# Supplementary material for: Altered Gene-Regulatory Function of KDM5C by a Novel Mutation Associated With Autism and Intellectual Disability
Source: Front Mol Neurosci. 2018 Apr 4;11:104. doi: 10.3389/fnmol.2018.00104 (PMC5893713; doi:10.3389/fnmol.2018.00104)
Supplement: TABLE S2 — DAVID GO term analysis of WT, R1115H, and H514A down-regulated DE genes. [file Data_Sheet_1.XLSX]

## Sheet: WT down genes
DAVID GO term analysis of WT down-regulated DE genes
Vallianatos et al., 2018
Annotation Cluster 1	Enrichment Score: 1.6800369613421262
Category	Term	Count	%	PValue	Genes	List Total	Pop Hits	Pop Total	Fold Enrichment	Bonferroni	Benjamini	FDR
GOTERM_BP_ALL	GO:0010035~response to inorganic substance	5	14.2857	0.00781851	GPX1, CCND1, CPNE6, KRT10, COL1A1	27	558	18082	6.00093	0.999947	0.439798	11.9798
GOTERM_BP_ALL	GO:0051592~response to calcium ion	3	8.57143	0.0142474	CCND1, CPNE6, KRT10	27	127	18082	15.8198	1	0.499756	20.8071
GOTERM_BP_ALL	GO:0010038~response to metal ion	3	8.57143	0.0818518	CCND1, CPNE6, KRT10	27	332	18082	6.05154	1	0.596767	75.0495
Annotation Cluster 2	Enrichment Score: 1.5413405824139232
Category	Term	Count	%	PValue	Genes	List Total	Pop Hits	Pop Total	Fold Enrichment	Bonferroni	Benjamini	FDR
GOTERM_BP_ALL	GO:0044767~single-organism developmental process	18	51.4286	0.000592409	MYL6, SEPT4, NES, CCK, TNFRSF12A, CPNE6, ROMO1, KRT10, CDC20, VGF, H19, PIN1, CDKN1C, GPX1, CCND1, SPRED3, COL1A1, HIST1H4I	27	5879	18082	2.05046	0.524645	0.524645	0.958729
GOTERM_BP_ALL	GO:0032502~developmental process	18	51.4286	0.000744831	MYL6, SEPT4, NES, CCK, TNFRSF12A, CPNE6, ROMO1, KRT10, CDC20, VGF, H19, PIN1, CDKN1C, GPX1, CCND1, SPRED3, COL1A1, HIST1H4I	27	5983	18082	2.01482	0.607458	0.373468	1.204
GOTERM_BP_ALL	GO:0044707~single-multicellular organism process	18	51.4286	0.0010879	MYL6, SEPT4, NES, CCK, TNFRSF12A, CPNE6, KRT10, CDC20, VGF, H19, PIN1, CDKN1C, GPX1, CCND1, RIN1, SPRED3, COL1A1, HIST1H4I	27	6161	18082	1.95661	0.74489	0.239068	1.75398
GOTERM_BP_ALL	GO:0048731~system development	15	42.8571	0.00186102	MYL6, SEPT4, NES, CCK, TNFRSF12A, CPNE6, KRT10, CDC20, VGF, PIN1, CDKN1C, GPX1, CCND1, COL1A1, HIST1H4I	27	4610	18082	2.17908	0.903456	0.283922	2.98286
GOTERM_BP_ALL	GO:0007275~multicellular organism development	16	45.7143	0.00188359	MYL6, SEPT4, NES, CCK, TNFRSF12A, CPNE6, KRT10, CDC20, VGF, PIN1, CDKN1C, GPX1, CCND1, SPRED3, COL1A1, HIST1H4I	27	5195	18082	2.06261	0.906157	0.256039	3.01851
GOTERM_MF_ALL	GO:0005515~protein binding	21	60	0.0026297	MYL6, HYPK, TPPP3, NES, CCK, TNFRSF12A, NFKBIB, CPNE6, CDC20, KRT10, VGF, TIMM23, PIN1, CDKN1C, GPX1, CCND1, HIST1H3A, RIN1, SPRED3, COL1A1, HIST1H4I	28	7972	17446	1.64131	0.350686	0.350686	3.14248
GOTERM_BP_ALL	GO:0048468~cell development	10	28.5714	0.00328546	CDKN1C, GPX1, SEPT4, CCK, TNFRSF12A, CPNE6, CDC20, KRT10, COL1A1, PIN1	27	2278	18082	2.93988	0.983918	0.33834	5.20932
GOTERM_BP_ALL	GO:0050793~regulation of developmental process	10	28.5714	0.00349983	CDKN1C, GPX1, CCND1, TNFRSF12A, CPNE6, CDC20, COL1A1, HIST1H4I, H19, PIN1	27	2299	18082	2.91302	0.987723	0.32968	5.54021
GOTERM_BP_ALL	GO:0051239~regulation of multicellular organismal process	11	31.4286	0.00384322	CDKN1C, GPX1, CCND1, CCK, TNFRSF12A, CPNE6, CDC20, COL1A1, HIST1H4I, H19, PIN1	27	2804	18082	2.62723	0.992034	0.331495	6.06798
GOTERM_BP_ALL	GO:2000026~regulation of multicellular organismal development	9	25.7143	0.00387875	CDKN1C, GPX1, CCND1, TNFRSF12A, CPNE6, CDC20, COL1A1, HIST1H4I, PIN1	27	1888	18082	3.19244	0.992382	0.312832	6.12244
GOTERM_BP_ALL	GO:0048869~cellular developmental process	14	40	0.00462274	CDKN1C, GPX1, SEPT4, NES, CCND1, CCK, TNFRSF12A, CPNE6, ROMO1, CDC20, KRT10, COL1A1, HIST1H4I, PIN1	27	4465	18082	2.09985	0.997017	0.339895	7.25582
GOTERM_BP_ALL	GO:0048856~anatomical structure development	16	45.7143	0.00614525	MYL6, SEPT4, NES, CCK, TNFRSF12A, CPNE6, KRT10, CDC20, VGF, PIN1, CDKN1C, GPX1, CCND1, SPRED3, COL1A1, HIST1H4I	27	5799	18082	1.84778	0.999563	0.402941	9.53531
GOTERM_BP_ALL	GO:0016043~cellular component organization	16	45.7143	0.00699782	SEPT4, TPPP3, NES, CCK, TNFRSF12A, CPNE6, KRT10, CDC20, TAF6L, TIMM23, PIN1, CDKN1C, GPX1, HIST1H3A, COL1A1, HIST1H4I	27	5872	18082	1.82481	0.999851	0.423524	10.7887
GOTERM_BP_ALL	GO:0006996~organelle organization	12	34.2857	0.00792895	CDKN1C, GPX1, TPPP3, SEPT4, NES, CCK, HIST1H3A, CDC20, KRT10, TIMM23, HIST1H4I, TAF6L	27	3620	18082	2.22001	0.999954	0.425943	12.1389
GOTERM_BP_ALL	GO:0071840~cellular component organization or biogenesis	16	45.7143	0.00929787	SEPT4, TPPP3, NES, CCK, TNFRSF12A, CPNE6, KRT10, CDC20, TAF6L, TIMM23, PIN1, CDKN1C, GPX1, HIST1H3A, COL1A1, HIST1H4I	27	6037	18082	1.77493	0.999992	0.460451	14.0892
GOTERM_BP_ALL	GO:0045595~regulation of cell differentiation	8	22.8571	0.0115973	CDKN1C, CCND1, TNFRSF12A, CPNE6, CDC20, COL1A1, HIST1H4I, PIN1	27	1802	18082	2.97316	1	0.501987	17.2741
GOTERM_BP_ALL	GO:0051128~regulation of cellular component organization	9	25.7143	0.0162099	CDKN1C, GPX1, NES, CCK, TNFRSF12A, CPNE6, CDC20, COL1A1, PIN1	27	2399	18082	2.51244	1	0.519297	23.3317
GOTERM_BP_ALL	GO:0048513~animal organ development	11	31.4286	0.0193277	CDKN1C, MYL6, GPX1, SEPT4, NES, CCND1, KRT10, COL1A1, VGF, HIST1H4I, PIN1	27	3520	18082	2.09282	1	0.558005	27.1875
GOTERM_BP_ALL	GO:0048518~positive regulation of biological process	14	40	0.0213367	CDKN1C, GPX1, SEPT4, NES, CCND1, CCK, TNFRSF12A, CPNE6, HIST1H3A, ROMO1, CDC20, COL1A1, HIST1H4I, PIN1	27	5311	18082	1.76536	1	0.559666	29.5749
GOTERM_BP_ALL	GO:0030154~cell differentiation	12	34.2857	0.0217484	CDKN1C, GPX1, SEPT4, CCND1, CCK, TNFRSF12A, CPNE6, CDC20, KRT10, COL1A1, HIST1H4I, PIN1	27	4143	18082	1.93976	1	0.555866	30.055
GOTERM_BP_ALL	GO:0050794~regulation of cellular process	22	62.8571	0.021935	SEPT4, NES, CCK, TNFRSF12A, NFKBIB, CPNE6, ROMO1, CDC20, VGF, TAF6L, H19, GPR153, PIN1, CDKN1C, GPX1, CCND1, HIST1H3A, REM2, RIN1, SPRED3, COL1A1, HIST1H4I	27	10870	18082	1.35543	1	0.548545	30.2716
GOTERM_BP_ALL	GO:0044763~single-organism cellular process	24	68.5714	0.0219408	MYL6, TPPP3, SEPT4, NES, CCK, TNFRSF12A, NFKBIB, CPNE6, ROMO1, CDC20, KRT10, VGF, TIMM23, GPR153, PIN1, CDKN1C, GPX1, CCND1, HIST1H3A, REM2, RIN1, SPRED3, COL1A1, HIST1H4I	27	12536	18082	1.28214	1	0.538557	30.2783
GOTERM_BP_ALL	GO:0032501~multicellular organismal process	18	51.4286	0.0272735	MYL6, SEPT4, NES, CCK, TNFRSF12A, CPNE6, KRT10, CDC20, VGF, H19, PIN1, CDKN1C, GPX1, CCND1, RIN1, SPRED3, COL1A1, HIST1H4I	27	8084	18082	1.49118	1	0.580039	36.2078
GOTERM_BP_ALL	GO:0007399~nervous system development	8	22.8571	0.03631	CDKN1C, SEPT4, NES, CCK, TNFRSF12A, CPNE6, CDC20, PIN1	27	2261	18082	2.36958	1	0.563459	45.1884
GOTERM_BP_ALL	GO:0031323~regulation of cellular metabolic process	14	40	0.0364587	SEPT4, CCK, ROMO1, CDC20, TAF6L, PIN1, H19, CDKN1C, GPX1, CCND1, HIST1H3A, SPRED3, COL1A1, HIST1H4I	27	5673	18082	1.65271	1	0.558567	45.3258
GOTERM_BP_ALL	GO:0010604~positive regulation of macromolecule metabolic process	9	25.7143	0.0374452	CDKN1C, SEPT4, CCND1, CCK, HIST1H3A, CDC20, COL1A1, HIST1H4I, PIN1	27	2794	18082	2.15724	1	0.549893	46.2287
GOTERM_BP_ALL	GO:0050789~regulation of biological process	22	62.8571	0.0415305	SEPT4, NES, CCK, TNFRSF12A, NFKBIB, CPNE6, ROMO1, CDC20, VGF, TAF6L, H19, GPR153, PIN1, CDKN1C, GPX1, CCND1, HIST1H3A, REM2, RIN1, SPRED3, COL1A1, HIST1H4I	27	11372	18082	1.29559	1	0.54821	49.8211
GOTERM_BP_ALL	GO:0044699~single-organism process	25	71.4286	0.0484995	MYL6, SEPT4, TPPP3, NES, CCK, TNFRSF12A, CPNE6, NFKBIB, ROMO1, KRT10, CDC20, VGF, TIMM23, H19, GPR153, PIN1, CDKN1C, GPX1, CCND1, REM2, HIST1H3A, RIN1, SPRED3, COL1A1, HIST1H4I	27	14030	18082	1.19334	1	0.564778	55.4344
GOTERM_BP_ALL	GO:0048522~positive regulation of cellular process	12	34.2857	0.0600572	CDKN1C, GPX1, SEPT4, NES, CCND1, CCK, TNFRSF12A, CPNE6, ROMO1, CDC20, COL1A1, PIN1	27	4808	18082	1.67147	1	0.570396	63.4645
GOTERM_BP_ALL	GO:0019222~regulation of metabolic process	14	40	0.0634112	SEPT4, CCK, ROMO1, CDC20, TAF6L, PIN1, H19, CDKN1C, GPX1, CCND1, HIST1H3A, SPRED3, COL1A1, HIST1H4I	27	6098	18082	1.53753	1	0.57532	65.5272
GOTERM_BP_ALL	GO:0080090~regulation of primary metabolic process	13	37.1429	0.0774271	SEPT4, CCK, CDC20, TAF6L, PIN1, H19, CDKN1C, GPX1, CCND1, HIST1H3A, SPRED3, COL1A1, HIST1H4I	27	5629	18082	1.54666	1	0.604609	73.0212
GOTERM_BP_ALL	GO:0065007~biological regulation	22	62.8571	0.0775977	SEPT4, NES, CCK, TNFRSF12A, NFKBIB, CPNE6, ROMO1, CDC20, VGF, TAF6L, H19, GPR153, PIN1, CDKN1C, GPX1, CCND1, HIST1H3A, REM2, RIN1, SPRED3, COL1A1, HIST1H4I	27	11917	18082	1.23634	1	0.598783	73.1022
GOTERM_BP_ALL	GO:0060255~regulation of macromolecule metabolic process	13	37.1429	0.0880185	SEPT4, CCK, CDC20, TAF6L, PIN1, H19, CDKN1C, GPX1, CCND1, HIST1H3A, SPRED3, COL1A1, HIST1H4I	27	5739	18082	1.51701	1	0.615427	77.6386
GOTERM_BP_ALL	GO:0031325~positive regulation of cellular metabolic process	8	22.8571	0.0908821	CDKN1C, SEPT4, CCND1, CCK, ROMO1, CDC20, COL1A1, PIN1	27	2769	18082	1.93486	1	0.618762	78.7531
GOTERM_MF_ALL	GO:0005488~binding	25	71.4286	0.119526	HYPK, MYL6, SEPT4, FLYWCH2, TPPP3, CCK, TNFRSF12A, NFKBIB, VGF, PIN1, TRIM47, GPX1, SPRED3, HIST1H4I, NES, CPNE6, KRT10, CDC20, TIMM23, CDKN1C, CCND1, REM2, HIST1H3A, RIN1, COL1A1	28	13572	17446	1.14771	1	0.99905	78.6379
GOTERM_BP_ALL	GO:0009653~anatomical structure morphogenesis	7	20	0.192023	CDKN1C, GPX1, NES, CCK, TNFRSF12A, CPNE6, COL1A1	27	2744	18082	1.70843	1	0.772	96.8768
GOTERM_BP_ALL	GO:0009987~cellular process	26	74.2857	0.198619	MYL6, TPPP3, SEPT4, CCK, TNFRSF12A, NFKBIB, ROMO1, VGF, PIN1, H19, GPX1, SPRED3, HIST1H4I, NES, CPNE6, CDC20, KRT10, TIMM23, TAF6L, GPR153, CDKN1C, CCND1, HIST1H3A, REM2, RIN1, COL1A1	27	16073	18082	1.08333	1	0.775523	97.2665
GOTERM_CC_ALL	GO:0044464~cell part	30	85.7143	0.396995	COPZ2, MYL6, HYPK, SEPT4, TPPP3, CCK, TNFRSF12A, NFKBIB, ROMO1, VGF, H19, PIN1, GPX1, TRIM47, SPRED3, HIST1H4I, NES, CPNE6, CDC20, KRT10, TIMM23, TAF6L, GPR153, CDKN1C, CCND1, TMEM240, HIST1H3A, REM2, RIN1, COL1A1	33	17135	19662	1.04316	1	0.938953	99.8227
GOTERM_CC_ALL	GO:0005623~cell	30	85.7143	0.409644	COPZ2, MYL6, HYPK, SEPT4, TPPP3, CCK, TNFRSF12A, NFKBIB, ROMO1, VGF, H19, PIN1, GPX1, TRIM47, SPRED3, HIST1H4I, NES, CPNE6, CDC20, KRT10, TIMM23, TAF6L, GPR153, CDKN1C, CCND1, TMEM240, HIST1H3A, REM2, RIN1, COL1A1	33	17173	19662	1.04085	1	0.932065	99.864
GOTERM_BP_ALL	GO:0044260~cellular macromolecule metabolic process	13	37.1429	0.506121	SEPT4, CCK, CDC20, TAF6L, PIN1, H19, CDKN1C, GPX1, CCND1, HIST1H3A, SPRED3, COL1A1, HIST1H4I	27	8038	18082	1.08312	1	0.953277	99.999
GOTERM_BP_ALL	GO:0044237~cellular metabolic process	15	42.8571	0.592526	SEPT4, CCK, ROMO1, CDC20, VGF, TAF6L, PIN1, H19, CDKN1C, GPX1, CCND1, HIST1H3A, SPRED3, COL1A1, HIST1H4I	27	9794	18082	1.02568	1	0.974829	100
GOTERM_BP_ALL	GO:0043170~macromolecule metabolic process	13	37.1429	0.691187	SEPT4, CCK, CDC20, TAF6L, PIN1, H19, CDKN1C, GPX1, CCND1, HIST1H3A, SPRED3, COL1A1, HIST1H4I	27	8886	18082	0.97976	1	0.990174	100
GOTERM_BP_ALL	GO:0008152~metabolic process	15	42.8571	0.805828	SEPT4, CCK, ROMO1, CDC20, VGF, TAF6L, PIN1, H19, CDKN1C, GPX1, CCND1, HIST1H3A, SPRED3, COL1A1, HIST1H4I	27	10880	18082	0.923305	1	0.997557	100
GOTERM_BP_ALL	GO:0044238~primary metabolic process	13	37.1429	0.853364	SEPT4, CCK, CDC20, TAF6L, PIN1, H19, CDKN1C, GPX1, CCND1, HIST1H3A, SPRED3, COL1A1, HIST1H4I	27	9853	18082	0.883604	1	0.99911	100
GOTERM_BP_ALL	GO:0071704~organic substance metabolic process	13	37.1429	0.918145	SEPT4, CCK, CDC20, TAF6L, PIN1, H19, CDKN1C, GPX1, CCND1, HIST1H3A, SPRED3, COL1A1, HIST1H4I	27	10445	18082	0.833523	1	0.999883	100
Annotation Cluster 3	Enrichment Score: 1.2514488704267965
Category	Term	Count	%	PValue	Genes	List Total	Pop Hits	Pop Total	Fold Enrichment	Bonferroni	Benjamini	FDR
GOTERM_BP_ALL	GO:2000026~regulation of multicellular organismal development	9	25.7143	0.00387875	CDKN1C, GPX1, CCND1, TNFRSF12A, CPNE6, CDC20, COL1A1, HIST1H4I, PIN1	27	1888	18082	3.19244	0.992382	0.312832	6.12244
GOTERM_BP_ALL	GO:0010035~response to inorganic substance	5	14.2857	0.00781851	GPX1, CCND1, CPNE6, KRT10, COL1A1	27	558	18082	6.00093	0.999947	0.439798	11.9798
GOTERM_BP_ALL	GO:0009966~regulation of signal transduction	9	25.7143	0.0190316	CDKN1C, GPX1, SEPT4, CCND1, TNFRSF12A, NFKBIB, SPRED3, COL1A1, PIN1	27	2468	18082	2.44219	1	0.564624	26.8293
GOTERM_BP_ALL	GO:0030154~cell differentiation	12	34.2857	0.0217484	CDKN1C, GPX1, SEPT4, CCND1, CCK, TNFRSF12A, CPNE6, CDC20, KRT10, COL1A1, HIST1H4I, PIN1	27	4143	18082	1.93976	1	0.555866	30.055
GOTERM_BP_ALL	GO:0070887~cellular response to chemical stimulus	9	25.7143	0.0257964	CDKN1C, GPX1, CCND1, NFKBIB, CPNE6, ROMO1, KRT10, COL1A1, PIN1	27	2607	18082	2.31198	1	0.568725	34.6146
GOTERM_BP_ALL	GO:0009888~tissue development	7	20	0.0477105	CDKN1C, MYL6, GPX1, CCND1, KRT10, COL1A1, PIN1	27	1889	18082	2.4817	1	0.573488	54.8299
GOTERM_BP_ALL	GO:0042221~response to chemical	11	31.4286	0.0509925	CDKN1C, GPX1, CCND1, CCK, NFKBIB, CPNE6, ROMO1, KRT10, COL1A1, VGF, PIN1	27	4096	18082	1.79852	1	0.564585	57.2952
GOTERM_BP_ALL	GO:0030855~epithelial cell differentiation	4	11.4286	0.0611356	CDKN1C, GPX1, CCND1, KRT10	27	633	18082	4.23193	1	0.569256	64.14
GOTERM_BP_ALL	GO:0050678~regulation of epithelial cell proliferation	3	8.57143	0.0780721	CDKN1C, GPX1, CCND1	27	323	18082	6.22016	1	0.597824	73.3262
GOTERM_BP_ALL	GO:0050673~epithelial cell proliferation	3	8.57143	0.101567	CDKN1C, GPX1, CCND1	27	377	18082	5.32921	1	0.644402	82.4682
GOTERM_BP_ALL	GO:0071310~cellular response to organic substance	6	17.1429	0.177874	CDKN1C, GPX1, CCND1, NFKBIB, COL1A1, PIN1	27	2103	18082	1.91071	1	0.754536	95.8584
GOTERM_BP_ALL	GO:0009719~response to endogenous stimulus	5	14.2857	0.196141	CDKN1C, CCND1, COL1A1, VGF, PIN1	27	1608	18082	2.08241	1	0.774439	97.1258
GOTERM_BP_ALL	GO:0007166~cell surface receptor signaling pathway	6	17.1429	0.223389	CDKN1C, GPX1, CCND1, TNFRSF12A, COL1A1, PIN1	27	2278	18082	1.76393	1	0.798596	98.3592
GOTERM_BP_ALL	GO:0060429~epithelium development	4	11.4286	0.230055	CDKN1C, GPX1, CCND1, KRT10	27	1157	18082	2.31531	1	0.801361	98.5737
GOTERM_BP_ALL	GO:0010033~response to organic substance	7	20	0.247034	CDKN1C, GPX1, CCND1, NFKBIB, COL1A1, VGF, PIN1	27	2972	18082	1.57736	1	0.81652	99.0074
Annotation Cluster 4	Enrichment Score: 1.148357629877837
Category	Term	Count	%	PValue	Genes	List Total	Pop Hits	Pop Total	Fold Enrichment	Bonferroni	Benjamini	FDR
GOTERM_BP_ALL	GO:0010646~regulation of cell communication	12	34.2857	0.000922886	CDKN1C, GPX1, SEPT4, CCND1, TNFRSF12A, NFKBIB, RIN1, SPRED3, CDC20, COL1A1, VGF, PIN1	27	2785	18082	2.88562	0.686124	0.320401	1.4898
GOTERM_BP_ALL	GO:0023051~regulation of signaling	12	34.2857	0.00099048	CDKN1C, GPX1, SEPT4, CCND1, TNFRSF12A, NFKBIB, RIN1, SPRED3, CDC20, COL1A1, VGF, PIN1	27	2808	18082	2.86198	0.711676	0.267225	1.5981
GOTERM_BP_ALL	GO:0048468~cell development	10	28.5714	0.00328546	CDKN1C, GPX1, SEPT4, CCK, TNFRSF12A, CPNE6, CDC20, KRT10, COL1A1, PIN1	27	2278	18082	2.93988	0.983918	0.33834	5.20932
GOTERM_BP_ALL	GO:0051239~regulation of multicellular organismal process	11	31.4286	0.00384322	CDKN1C, GPX1, CCND1, CCK, TNFRSF12A, CPNE6, CDC20, COL1A1, HIST1H4I, H19, PIN1	27	2804	18082	2.62723	0.992034	0.331495	6.06798
GOTERM_BP_ALL	GO:2000026~regulation of multicellular organismal development	9	25.7143	0.00387875	CDKN1C, GPX1, CCND1, TNFRSF12A, CPNE6, CDC20, COL1A1, HIST1H4I, PIN1	27	1888	18082	3.19244	0.992382	0.312832	6.12244
GOTERM_BP_ALL	GO:0048583~regulation of response to stimulus	11	31.4286	0.0131624	CDKN1C, GPX1, SEPT4, CCND1, CCK, TNFRSF12A, NFKBIB, HIST1H3A, SPRED3, COL1A1, PIN1	27	3327	18082	2.21423	1	0.530384	19.3781
GOTERM_BP_ALL	GO:0051128~regulation of cellular component organization	9	25.7143	0.0162099	CDKN1C, GPX1, NES, CCK, TNFRSF12A, CPNE6, CDC20, COL1A1, PIN1	27	2399	18082	2.51244	1	0.519297	23.3317
GOTERM_BP_ALL	GO:0009966~regulation of signal transduction	9	25.7143	0.0190316	CDKN1C, GPX1, SEPT4, CCND1, TNFRSF12A, NFKBIB, SPRED3, COL1A1, PIN1	27	2468	18082	2.44219	1	0.564624	26.8293
GOTERM_BP_ALL	GO:0050794~regulation of cellular process	22	62.8571	0.021935	SEPT4, NES, CCK, TNFRSF12A, NFKBIB, CPNE6, ROMO1, CDC20, VGF, TAF6L, H19, GPR153, PIN1, CDKN1C, GPX1, CCND1, HIST1H3A, REM2, RIN1, SPRED3, COL1A1, HIST1H4I	27	10870	18082	1.35543	1	0.548545	30.2716
GOTERM_BP_ALL	GO:0044763~single-organism cellular process	24	68.5714	0.0219408	MYL6, TPPP3, SEPT4, NES, CCK, TNFRSF12A, NFKBIB, CPNE6, ROMO1, CDC20, KRT10, VGF, TIMM23, GPR153, PIN1, CDKN1C, GPX1, CCND1, HIST1H3A, REM2, RIN1, SPRED3, COL1A1, HIST1H4I	27	12536	18082	1.28214	1	0.538557	30.2783
GOTERM_BP_ALL	GO:0050790~regulation of catalytic activity	7	20	0.0276667	GPX1, NES, CCND1, CCK, SPRED3, CDC20, PIN1	27	1662	18082	2.82065	1	0.567581	36.6257
GOTERM_BP_ALL	GO:0044700~single organism signaling	15	42.8571	0.0288855	SEPT4, CCK, TNFRSF12A, NFKBIB, CDC20, VGF, GPR153, PIN1, CDKN1C, GPX1, CCND1, REM2, SPRED3, RIN1, COL1A1	27	6137	18082	1.63688	1	0.558443	37.9048
GOTERM_BP_ALL	GO:0023052~signaling	15	42.8571	0.0303018	SEPT4, CCK, TNFRSF12A, NFKBIB, CDC20, VGF, GPR153, PIN1, CDKN1C, GPX1, CCND1, REM2, SPRED3, RIN1, COL1A1	27	6171	18082	1.62787	1	0.560288	39.3608
GOTERM_BP_ALL	GO:0051130~positive regulation of cellular component organization	6	17.1429	0.0307763	NES, CCK, TNFRSF12A, CPNE6, CDC20, COL1A1	27	1253	18082	3.20688	1	0.550956	39.8414
GOTERM_BP_ALL	GO:0007154~cell communication	15	42.8571	0.0329338	SEPT4, CCK, TNFRSF12A, NFKBIB, CDC20, VGF, GPR153, PIN1, CDKN1C, GPX1, CCND1, REM2, SPRED3, RIN1, COL1A1	27	6231	18082	1.61219	1	0.56136	41.9819
GOTERM_BP_ALL	GO:0007399~nervous system development	8	22.8571	0.03631	CDKN1C, SEPT4, NES, CCK, TNFRSF12A, CPNE6, CDC20, PIN1	27	2261	18082	2.36958	1	0.563459	45.1884
GOTERM_BP_ALL	GO:0009967~positive regulation of signal transduction	6	17.1429	0.0382431	CDKN1C, GPX1, SEPT4, TNFRSF12A, COL1A1, PIN1	27	1328	18082	3.02577	1	0.545839	46.9487
GOTERM_BP_ALL	GO:0050789~regulation of biological process	22	62.8571	0.0415305	SEPT4, NES, CCK, TNFRSF12A, NFKBIB, CPNE6, ROMO1, CDC20, VGF, TAF6L, H19, GPR153, PIN1, CDKN1C, GPX1, CCND1, HIST1H3A, REM2, RIN1, SPRED3, COL1A1, HIST1H4I	27	11372	18082	1.29559	1	0.54821	49.8211
GOTERM_BP_ALL	GO:0043065~positive regulation of apoptotic process	4	11.4286	0.0487809	SEPT4, CCK, TNFRSF12A, PIN1	27	577	18082	4.64266	1	0.55741	55.6482
GOTERM_BP_ALL	GO:0043068~positive regulation of programmed cell death	4	11.4286	0.0498276	SEPT4, CCK, TNFRSF12A, PIN1	27	582	18082	4.60277	1	0.560613	56.435
GOTERM_BP_ALL	GO:0097190~apoptotic signaling pathway	4	11.4286	0.0498276	GPX1, SEPT4, CCK, TNFRSF12A	27	582	18082	4.60277	1	0.560613	56.435
GOTERM_BP_ALL	GO:0010720~positive regulation of cell development	4	11.4286	0.0526012	TNFRSF12A, CPNE6, COL1A1, PIN1	27	595	18082	4.50221	1	0.567084	58.4569
GOTERM_BP_ALL	GO:0051716~cellular response to stimulus	16	45.7143	0.0529017	SEPT4, CCK, TNFRSF12A, NFKBIB, CPNE6, ROMO1, KRT10, GPR153, PIN1, CDKN1C, GPX1, CCND1, REM2, RIN1, SPRED3, COL1A1	27	7253	18082	1.47736	1	0.564759	58.6706
GOTERM_BP_ALL	GO:0042981~regulation of apoptotic process	6	17.1429	0.0569124	GPX1, SEPT4, NES, CCK, TNFRSF12A, PIN1	27	1482	18082	2.71135	1	0.574757	61.4258
GOTERM_BP_ALL	GO:0010647~positive regulation of cell communication	6	17.1429	0.0580079	CDKN1C, GPX1, SEPT4, TNFRSF12A, COL1A1, PIN1	27	1490	18082	2.69679	1	0.577697	62.1478
GOTERM_BP_ALL	GO:0010942~positive regulation of cell death	4	11.4286	0.058145	SEPT4, CCK, TNFRSF12A, PIN1	27	620	18082	4.32067	1	0.574424	62.2373
GOTERM_BP_ALL	GO:0023056~positive regulation of signaling	6	17.1429	0.0589767	CDKN1C, GPX1, SEPT4, TNFRSF12A, COL1A1, PIN1	27	1497	18082	2.68418	1	0.575639	62.7757
GOTERM_BP_ALL	GO:0043067~regulation of programmed cell death	6	17.1429	0.0591158	GPX1, SEPT4, NES, CCK, TNFRSF12A, PIN1	27	1498	18082	2.68239	1	0.57246	62.8651
GOTERM_BP_ALL	GO:0048522~positive regulation of cellular process	12	34.2857	0.0600572	CDKN1C, GPX1, SEPT4, NES, CCND1, CCK, TNFRSF12A, CPNE6, ROMO1, CDC20, COL1A1, PIN1	27	4808	18082	1.67147	1	0.570396	63.4645
GOTERM_BP_ALL	GO:0007005~mitochondrion organization	4	11.4286	0.0715398	GPX1, SEPT4, CCK, TIMM23	27	676	18082	3.96274	1	0.60241	70.0819
GOTERM_BP_ALL	GO:0050896~response to stimulus	18	51.4286	0.0758323	SEPT4, CCK, TNFRSF12A, NFKBIB, CPNE6, ROMO1, KRT10, VGF, GPR153, PIN1, CDKN1C, GPX1, CCND1, HIST1H3A, REM2, RIN1, SPRED3, COL1A1	27	8942	18082	1.3481	1	0.603456	72.253
GOTERM_BP_ALL	GO:0010941~regulation of cell death	6	17.1429	0.0775675	GPX1, SEPT4, NES, CCK, TNFRSF12A, PIN1	27	1620	18082	2.48038	1	0.601952	73.0879
GOTERM_BP_ALL	GO:0065007~biological regulation	22	62.8571	0.0775977	SEPT4, NES, CCK, TNFRSF12A, NFKBIB, CPNE6, ROMO1, CDC20, VGF, TAF6L, H19, GPR153, PIN1, CDKN1C, GPX1, CCND1, HIST1H3A, REM2, RIN1, SPRED3, COL1A1, HIST1H4I	27	11917	18082	1.23634	1	0.598783	73.1022
GOTERM_BP_ALL	GO:0007165~signal transduction	13	37.1429	0.0904552	CDKN1C, GPX1, SEPT4, CCND1, CCK, TNFRSF12A, NFKBIB, REM2, RIN1, SPRED3, COL1A1, GPR153, PIN1	27	5763	18082	1.5107	1	0.619923	78.5903
GOTERM_BP_ALL	GO:0006928~movement of cell or subcellular component	6	17.1429	0.0955875	MYL6, GPX1, CCK, TNFRSF12A, COL1A1, PIN1	27	1724	18082	2.33076	1	0.629474	80.472
GOTERM_BP_ALL	GO:0065008~regulation of biological quality	9	25.7143	0.0989845	GPX1, CCND1, CCK, TNFRSF12A, NFKBIB, RIN1, CDC20, VGF, PIN1	27	3398	18082	1.77379	1	0.637252	81.6308
GOTERM_BP_ALL	GO:0032268~regulation of cellular protein metabolic process	7	20	0.103193	GPX1, SEPT4, CCND1, CCK, SPRED3, CDC20, PIN1	27	2298	18082	2.04	1	0.644958	82.9771
GOTERM_BP_ALL	GO:2001233~regulation of apoptotic signaling pathway	3	8.57143	0.103835	GPX1, SEPT4, TNFRSF12A	27	382	18082	5.25945	1	0.644591	83.174
GOTERM_BP_ALL	GO:0006915~apoptotic process	6	17.1429	0.105953	GPX1, SEPT4, NES, CCK, TNFRSF12A, PIN1	27	1779	18082	2.2587	1	0.649686	83.809
GOTERM_BP_ALL	GO:0000902~cell morphogenesis	5	14.2857	0.108659	NES, CCK, TNFRSF12A, CPNE6, COL1A1	27	1283	18082	2.60991	1	0.643401	84.5875
GOTERM_BP_ALL	GO:0048584~positive regulation of response to stimulus	6	17.1429	0.116881	CDKN1C, GPX1, SEPT4, TNFRSF12A, COL1A1, PIN1	27	1834	18082	2.19096	1	0.658976	86.7432
GOTERM_BP_ALL	GO:0012501~programmed cell death	6	17.1429	0.124333	GPX1, SEPT4, NES, CCK, TNFRSF12A, PIN1	27	1870	18082	2.14878	1	0.670716	88.4491
GOTERM_BP_ALL	GO:0051674~localization of cell	5	14.2857	0.124369	GPX1, CCK, TNFRSF12A, COL1A1, PIN1	27	1348	18082	2.48406	1	0.6684	88.4569
GOTERM_BP_ALL	GO:0048870~cell motility	5	14.2857	0.124369	GPX1, CCK, TNFRSF12A, COL1A1, PIN1	27	1348	18082	2.48406	1	0.6684	88.4569
GOTERM_BP_ALL	GO:0032989~cellular component morphogenesis	5	14.2857	0.132974	NES, CCK, TNFRSF12A, CPNE6, COL1A1	27	1382	18082	2.42295	1	0.685036	90.169
GOTERM_BP_ALL	GO:0051246~regulation of protein metabolic process	7	20	0.136661	GPX1, SEPT4, CCND1, CCK, SPRED3, CDC20, PIN1	27	2483	18082	1.88801	1	0.691073	90.8271
GOTERM_BP_ALL	GO:0008219~cell death	6	17.1429	0.153815	GPX1, SEPT4, NES, CCK, TNFRSF12A, PIN1	27	2003	18082	2.0061	1	0.721431	93.3806
GOTERM_BP_ALL	GO:0045597~positive regulation of cell differentiation	4	11.4286	0.16482	TNFRSF12A, CPNE6, COL1A1, PIN1	27	981	18082	2.7307	1	0.737495	94.6495
GOTERM_BP_ALL	GO:0009611~response to wounding	3	8.57143	0.170614	GPX1, TNFRSF12A, COL1A1	27	519	18082	3.87112	1	0.746637	95.222
GOTERM_BP_ALL	GO:0040011~locomotion	5	14.2857	0.172972	GPX1, CCK, TNFRSF12A, COL1A1, PIN1	27	1529	18082	2.19001	1	0.747846	95.4381
GOTERM_BP_ALL	GO:0071310~cellular response to organic substance	6	17.1429	0.177874	CDKN1C, GPX1, CCND1, NFKBIB, COL1A1, PIN1	27	2103	18082	1.91071	1	0.754536	95.8584
GOTERM_BP_ALL	GO:0009653~anatomical structure morphogenesis	7	20	0.192023	CDKN1C, GPX1, NES, CCK, TNFRSF12A, CPNE6, COL1A1	27	2744	18082	1.70843	1	0.772	96.8768
GOTERM_BP_ALL	GO:0072358~cardiovascular system development	4	11.4286	0.194094	GPX1, TNFRSF12A, COL1A1, PIN1	27	1062	18082	2.52242	1	0.774174	97.0044
GOTERM_BP_ALL	GO:0072359~circulatory system development	4	11.4286	0.194094	GPX1, TNFRSF12A, COL1A1, PIN1	27	1062	18082	2.52242	1	0.774174	97.0044
GOTERM_BP_ALL	GO:0007166~cell surface receptor signaling pathway	6	17.1429	0.223389	CDKN1C, GPX1, CCND1, TNFRSF12A, COL1A1, PIN1	27	2278	18082	1.76393	1	0.798596	98.3592
GOTERM_BP_ALL	GO:0001568~blood vessel development	3	8.57143	0.234866	GPX1, TNFRSF12A, COL1A1	27	641	18082	3.13434	1	0.805802	98.7119
GOTERM_BP_ALL	GO:0016477~cell migration	4	11.4286	0.246393	GPX1, CCK, TNFRSF12A, COL1A1	27	1199	18082	2.23421	1	0.817072	98.9936
GOTERM_BP_ALL	GO:0010033~response to organic substance	7	20	0.247034	CDKN1C, GPX1, CCND1, NFKBIB, COL1A1, VGF, PIN1	27	2972	18082	1.57736	1	0.81652	99.0074
GOTERM_BP_ALL	GO:0001944~vasculature development	3	8.57143	0.254225	GPX1, TNFRSF12A, COL1A1	27	677	18082	2.96767	1	0.818103	99.1508
GOTERM_BP_ALL	GO:0000904~cell morphogenesis involved in differentiation	3	8.57143	0.322183	CCK, TNFRSF12A, COL1A1	27	803	18082	2.50201	1	0.873558	99.8204
GOTERM_BP_ALL	GO:0003008~system process	6	17.1429	0.344559	MYL6, GPX1, CCK, RIN1, COL1A1, PIN1	27	2696	18082	1.49044	1	0.886145	99.8959
GOTERM_BP_ALL	GO:0051336~regulation of hydrolase activity	3	8.57143	0.37168	GPX1, CCK, PIN1	27	896	18082	2.24231	1	0.898438	99.9476
GOTERM_BP_ALL	GO:0048646~anatomical structure formation involved in morphogenesis	3	8.57143	0.550823	GPX1, TNFRSF12A, COL1A1	27	1263	18082	1.59075	1	0.965629	99.9998
GOTERM_BP_ALL	GO:0050877~neurological system process	4	11.4286	0.587523	GPX1, CCK, RIN1, COL1A1	27	2077	18082	1.28975	1	0.97385	99.9999
GOTERM_BP_ALL	GO:0007600~sensory perception	3	8.57143	0.713495	GPX1, CCK, COL1A1	27	1691	18082	1.18812	1	0.991989	100
GOTERM_BP_ALL	GO:0044710~single-organism metabolic process	4	11.4286	0.918566	GPX1, SPRED3, COL1A1, PIN1	27	3641	18082	0.735736	1	0.999882	100
Annotation Cluster 5	Enrichment Score: 1.145604024184497
Category	Term	Count	%	PValue	Genes	List Total	Pop Hits	Pop Total	Fold Enrichment	Bonferroni	Benjamini	FDR
GOTERM_BP_ALL	GO:0048589~developmental growth	6	17.1429	0.00312172	CDKN1C, GPX1, TNFRSF12A, CPNE6, H19, PIN1	27	714	18082	5.62776	0.980236	0.353374	4.95585
GOTERM_BP_ALL	GO:0048468~cell development	10	28.5714	0.00328546	CDKN1C, GPX1, SEPT4, CCK, TNFRSF12A, CPNE6, CDC20, KRT10, COL1A1, PIN1	27	2278	18082	2.93988	0.983918	0.33834	5.20932
GOTERM_BP_ALL	GO:0050793~regulation of developmental process	10	28.5714	0.00349983	CDKN1C, GPX1, CCND1, TNFRSF12A, CPNE6, CDC20, COL1A1, HIST1H4I, H19, PIN1	27	2299	18082	2.91302	0.987723	0.32968	5.54021
GOTERM_BP_ALL	GO:2000026~regulation of multicellular organismal development	9	25.7143	0.00387875	CDKN1C, GPX1, CCND1, TNFRSF12A, CPNE6, CDC20, COL1A1, HIST1H4I, PIN1	27	1888	18082	3.19244	0.992382	0.312832	6.12244
GOTERM_BP_ALL	GO:0048638~regulation of developmental growth	4	11.4286	0.0140674	TNFRSF12A, CPNE6, H19, PIN1	27	356	18082	7.52476	1	0.523284	20.5717
GOTERM_BP_ALL	GO:0040007~growth	6	17.1429	0.0146428	CDKN1C, GPX1, TNFRSF12A, CPNE6, H19, PIN1	27	1035	18082	3.88234	1	0.496238	21.3219
GOTERM_BP_ALL	GO:0051128~regulation of cellular component organization	9	25.7143	0.0162099	CDKN1C, GPX1, NES, CCK, TNFRSF12A, CPNE6, CDC20, COL1A1, PIN1	27	2399	18082	2.51244	1	0.519297	23.3317
GOTERM_BP_ALL	GO:0030307~positive regulation of cell growth	3	8.57143	0.0251749	TNFRSF12A, CPNE6, PIN1	27	172	18082	11.6809	1	0.569186	33.9332
GOTERM_BP_ALL	GO:0048639~positive regulation of developmental growth	3	8.57143	0.0293836	TNFRSF12A, CPNE6, PIN1	27	187	18082	10.7439	1	0.556774	38.4206
GOTERM_BP_ALL	GO:0051094~positive regulation of developmental process	6	17.1429	0.0306837	CCND1, TNFRSF12A, CPNE6, CDC20, COL1A1, PIN1	27	1252	18082	3.20944	1	0.557279	39.7479
GOTERM_BP_ALL	GO:0051130~positive regulation of cellular component organization	6	17.1429	0.0307763	NES, CCK, TNFRSF12A, CPNE6, CDC20, COL1A1	27	1253	18082	3.20688	1	0.550956	39.8414
GOTERM_BP_ALL	GO:0007399~nervous system development	8	22.8571	0.03631	CDKN1C, SEPT4, NES, CCK, TNFRSF12A, CPNE6, CDC20, PIN1	27	2261	18082	2.36958	1	0.563459	45.1884
GOTERM_BP_ALL	GO:0048588~developmental cell growth	3	8.57143	0.0379308	TNFRSF12A, CPNE6, PIN1	27	215	18082	9.3447	1	0.548674	46.668
GOTERM_BP_ALL	GO:0009967~positive regulation of signal transduction	6	17.1429	0.0382431	CDKN1C, GPX1, SEPT4, TNFRSF12A, COL1A1, PIN1	27	1328	18082	3.02577	1	0.545839	46.9487
GOTERM_BP_ALL	GO:0030182~neuron differentiation	6	17.1429	0.0439211	CDKN1C, CCK, TNFRSF12A, CPNE6, CDC20, PIN1	27	1379	18082	2.91387	1	0.56349	51.8174
GOTERM_BP_ALL	GO:0010720~positive regulation of cell development	4	11.4286	0.0526012	TNFRSF12A, CPNE6, COL1A1, PIN1	27	595	18082	4.50221	1	0.567084	58.4569
GOTERM_BP_ALL	GO:0060284~regulation of cell development	5	14.2857	0.0536607	TNFRSF12A, CPNE6, CDC20, COL1A1, PIN1	27	1006	18082	3.32855	1	0.565673	59.2058
GOTERM_BP_ALL	GO:0010647~positive regulation of cell communication	6	17.1429	0.0580079	CDKN1C, GPX1, SEPT4, TNFRSF12A, COL1A1, PIN1	27	1490	18082	2.69679	1	0.577697	62.1478
GOTERM_BP_ALL	GO:0023056~positive regulation of signaling	6	17.1429	0.0589767	CDKN1C, GPX1, SEPT4, TNFRSF12A, COL1A1, PIN1	27	1497	18082	2.68418	1	0.575639	62.7757
GOTERM_BP_ALL	GO:0045927~positive regulation of growth	3	8.57143	0.0597199	TNFRSF12A, CPNE6, PIN1	27	277	18082	7.25311	1	0.572255	63.2508
GOTERM_BP_ALL	GO:0048699~generation of neurons	6	17.1429	0.0630925	CDKN1C, CCK, TNFRSF12A, CPNE6, CDC20, PIN1	27	1526	18082	2.63317	1	0.577236	65.3361
GOTERM_BP_ALL	GO:0048666~neuron development	5	14.2857	0.0685629	CDKN1C, CCK, TNFRSF12A, CPNE6, CDC20	27	1092	18082	3.06641	1	0.593588	68.4838
GOTERM_BP_ALL	GO:0051240~positive regulation of multicellular organismal process	6	17.1429	0.0737072	CCND1, TNFRSF12A, CPNE6, CDC20, COL1A1, PIN1	27	1596	18082	2.51768	1	0.603045	71.1974
GOTERM_BP_ALL	GO:0040008~regulation of growth	4	11.4286	0.0745806	TNFRSF12A, CPNE6, H19, PIN1	27	688	18082	3.89363	1	0.604027	71.6357
GOTERM_BP_ALL	GO:0022008~neurogenesis	6	17.1429	0.0805365	CDKN1C, CCK, TNFRSF12A, CPNE6, CDC20, PIN1	27	1638	18082	2.45313	1	0.596837	74.462
GOTERM_BP_ALL	GO:0000902~cell morphogenesis	5	14.2857	0.108659	NES, CCK, TNFRSF12A, CPNE6, COL1A1	27	1283	18082	2.60991	1	0.643401	84.5875
GOTERM_BP_ALL	GO:0048858~cell projection morphogenesis	4	11.4286	0.114774	NES, CCK, TNFRSF12A, CPNE6	27	830	18082	3.22749	1	0.659541	86.2193
GOTERM_BP_ALL	GO:0001558~regulation of cell growth	3	8.57143	0.116794	TNFRSF12A, CPNE6, PIN1	27	410	18082	4.90027	1	0.661223	86.7219
GOTERM_BP_ALL	GO:0048584~positive regulation of response to stimulus	6	17.1429	0.116881	CDKN1C, GPX1, SEPT4, TNFRSF12A, COL1A1, PIN1	27	1834	18082	2.19096	1	0.658976	86.7432
GOTERM_CC_ALL	GO:0042995~cell projection	7	20	0.123943	SEPT4, CCK, TNFRSF12A, CPNE6, RIN1, VGF, PIN1	33	2120	19662	1.96732	1	0.94638	80.9324
GOTERM_BP_ALL	GO:0051674~localization of cell	5	14.2857	0.124369	GPX1, CCK, TNFRSF12A, COL1A1, PIN1	27	1348	18082	2.48406	1	0.6684	88.4569
GOTERM_BP_ALL	GO:0048870~cell motility	5	14.2857	0.124369	GPX1, CCK, TNFRSF12A, COL1A1, PIN1	27	1348	18082	2.48406	1	0.6684	88.4569
GOTERM_BP_ALL	GO:0032990~cell part morphogenesis	4	11.4286	0.125132	NES, CCK, TNFRSF12A, CPNE6	27	863	18082	3.10407	1	0.668377	88.6192
GOTERM_BP_ALL	GO:0032989~cellular component morphogenesis	5	14.2857	0.132974	NES, CCK, TNFRSF12A, CPNE6, COL1A1	27	1382	18082	2.42295	1	0.685036	90.169
GOTERM_BP_ALL	GO:0030030~cell projection organization	5	14.2857	0.135553	NES, CCK, TNFRSF12A, CPNE6, CDC20	27	1392	18082	2.40554	1	0.69021	90.6338
GOTERM_BP_ALL	GO:0016049~cell growth	3	8.57143	0.143863	TNFRSF12A, CPNE6, PIN1	27	466	18082	4.3114	1	0.704276	91.9949
GOTERM_BP_ALL	GO:0031175~neuron projection development	4	11.4286	0.144153	CCK, TNFRSF12A, CPNE6, CDC20	27	921	18082	2.90859	1	0.702815	92.0388
GOTERM_BP_ALL	GO:0045597~positive regulation of cell differentiation	4	11.4286	0.16482	TNFRSF12A, CPNE6, COL1A1, PIN1	27	981	18082	2.7307	1	0.737495	94.6495
GOTERM_BP_ALL	GO:0010975~regulation of neuron projection development	3	8.57143	0.167539	TNFRSF12A, CPNE6, CDC20	27	513	18082	3.9164	1	0.741717	94.9258
GOTERM_BP_ALL	GO:0040011~locomotion	5	14.2857	0.172972	GPX1, CCK, TNFRSF12A, COL1A1, PIN1	27	1529	18082	2.19001	1	0.747846	95.4381
GOTERM_BP_ALL	GO:0051962~positive regulation of nervous system development	3	8.57143	0.191354	TNFRSF12A, CPNE6, CDC20	27	559	18082	3.59412	1	0.774432	96.8345
GOTERM_BP_ALL	GO:0009653~anatomical structure morphogenesis	7	20	0.192023	CDKN1C, GPX1, NES, CCK, TNFRSF12A, CPNE6, COL1A1	27	2744	18082	1.70843	1	0.772	96.8768
GOTERM_BP_ALL	GO:0072358~cardiovascular system development	4	11.4286	0.194094	GPX1, TNFRSF12A, COL1A1, PIN1	27	1062	18082	2.52242	1	0.774174	97.0044
GOTERM_BP_ALL	GO:0072359~circulatory system development	4	11.4286	0.194094	GPX1, TNFRSF12A, COL1A1, PIN1	27	1062	18082	2.52242	1	0.774174	97.0044
GOTERM_BP_ALL	GO:0048812~neuron projection morphogenesis	3	8.57143	0.197124	CCK, TNFRSF12A, CPNE6	27	570	18082	3.52476	1	0.774495	97.1824
GOTERM_BP_ALL	GO:0022604~regulation of cell morphogenesis	3	8.57143	0.202919	TNFRSF12A, CPNE6, COL1A1	27	581	18082	3.45802	1	0.776437	97.4954
GOTERM_BP_ALL	GO:0007166~cell surface receptor signaling pathway	6	17.1429	0.223389	CDKN1C, GPX1, CCND1, TNFRSF12A, COL1A1, PIN1	27	2278	18082	1.76393	1	0.798596	98.3592
GOTERM_BP_ALL	GO:0031344~regulation of cell projection organization	3	8.57143	0.246147	TNFRSF12A, CPNE6, CDC20	27	662	18082	3.03491	1	0.818202	98.9883
GOTERM_BP_ALL	GO:0045664~regulation of neuron differentiation	3	8.57143	0.256382	TNFRSF12A, CPNE6, CDC20	27	681	18082	2.95024	1	0.81687	99.1899
GOTERM_BP_ALL	GO:0050767~regulation of neurogenesis	3	8.57143	0.333442	TNFRSF12A, CPNE6, CDC20	27	824	18082	2.43824	1	0.8801	99.8632
GOTERM_BP_ALL	GO:0051960~regulation of nervous system development	3	8.57143	0.385314	TNFRSF12A, CPNE6, CDC20	27	922	18082	2.17908	1	0.904535	99.9633
GOTERM_BP_ALL	GO:0022603~regulation of anatomical structure morphogenesis	3	8.57143	0.442153	TNFRSF12A, CPNE6, COL1A1	27	1033	18082	1.94493	1	0.928275	99.9924
Annotation Cluster 6	Enrichment Score: 1.0227478283027536
Category	Term	Count	%	PValue	Genes	List Total	Pop Hits	Pop Total	Fold Enrichment	Bonferroni	Benjamini	FDR
GOTERM_BP_ALL	GO:0048167~regulation of synaptic plasticity	3	8.57143	0.0251749	RIN1, CDC20, VGF	27	172	18082	11.6809	1	0.569186	33.9332
GOTERM_BP_ALL	GO:0007267~cell-cell signaling	6	17.1429	0.0347295	CCND1, RIN1, CDC20, COL1A1, VGF, PIN1	27	1294	18082	3.10527	1	0.566987	43.7086
GOTERM_BP_ALL	GO:0050803~regulation of synapse structure or activity	3	8.57143	0.0608643	RIN1, CDC20, VGF	27	280	18082	7.1754	1	0.571472	63.9712
GOTERM_BP_ALL	GO:0050804~modulation of synaptic transmission	3	8.57143	0.0818518	RIN1, CDC20, VGF	27	332	18082	6.05154	1	0.596767	75.0495
GOTERM_BP_ALL	GO:0099537~trans-synaptic signaling	3	8.57143	0.197124	RIN1, CDC20, VGF	27	570	18082	3.52476	1	0.774495	97.1824
GOTERM_BP_ALL	GO:0098916~anterograde trans-synaptic signaling	3	8.57143	0.197124	RIN1, CDC20, VGF	27	570	18082	3.52476	1	0.774495	97.1824
GOTERM_BP_ALL	GO:0099536~synaptic signaling	3	8.57143	0.197124	RIN1, CDC20, VGF	27	570	18082	3.52476	1	0.774495	97.1824
GOTERM_BP_ALL	GO:0007268~chemical synaptic transmission	3	8.57143	0.197124	RIN1, CDC20, VGF	27	570	18082	3.52476	1	0.774495	97.1824
Annotation Cluster 7	Enrichment Score: 1.0015230222497649
Category	Term	Count	%	PValue	Genes	List Total	Pop Hits	Pop Total	Fold Enrichment	Bonferroni	Benjamini	FDR
GOTERM_CC_ALL	GO:0031988~membrane-bounded vesicle	11	31.4286	0.0426217	COPZ2, MYL6, GPX1, TPPP3, CPNE6, HIST1H3A, KRT10, COL1A1, VGF, HIST1H4I, TAF6L	33	3455	19662	1.89696	0.999828	0.986884	42.0442
GOTERM_CC_ALL	GO:0031982~vesicle	11	31.4286	0.0565919	COPZ2, MYL6, GPX1, TPPP3, CPNE6, HIST1H3A, KRT10, COL1A1, VGF, HIST1H4I, TAF6L	33	3624	19662	1.8085	0.999991	0.979023	51.789
GOTERM_CC_ALL	GO:0044421~extracellular region part	11	31.4286	0.0881309	MYL6, GPX1, TPPP3, CCK, CPNE6, HIST1H3A, KRT10, COL1A1, VGF, HIST1H4I, TAF6L	33	3920	19662	1.67194	1	0.953108	68.5075
GOTERM_CC_ALL	GO:0070062~extracellular exosome	8	22.8571	0.135094	MYL6, GPX1, TPPP3, CPNE6, HIST1H3A, KRT10, HIST1H4I, TAF6L	33	2674	19662	1.78255	1	0.944322	83.7587
GOTERM_CC_ALL	GO:1903561~extracellular vesicle	8	22.8571	0.138054	MYL6, GPX1, TPPP3, CPNE6, HIST1H3A, KRT10, HIST1H4I, TAF6L	33	2689	19662	1.77261	1	0.931958	84.4412
GOTERM_CC_ALL	GO:0043230~extracellular organelle	8	22.8571	0.139446	MYL6, GPX1, TPPP3, CPNE6, HIST1H3A, KRT10, HIST1H4I, TAF6L	33	2696	19662	1.76801	1	0.91713	84.7532
GOTERM_CC_ALL	GO:0005576~extracellular region	11	31.4286	0.176496	MYL6, GPX1, TPPP3, CCK, CPNE6, HIST1H3A, KRT10, COL1A1, VGF, HIST1H4I, TAF6L	33	4493	19662	1.45871	1	0.936722	91.2133
Annotation Cluster 8	Enrichment Score: 0.9357040771983867
Category	Term	Count	%	PValue	Genes	List Total	Pop Hits	Pop Total	Fold Enrichment	Bonferroni	Benjamini	FDR
GOTERM_BP_ALL	GO:0051291~protein heterooligomerization	3	8.57143	0.0202395	HIST1H3A, COL1A1, HIST1H4I	27	153	18082	13.1314	1	0.551529	28.2803
GOTERM_BP_ALL	GO:0051259~protein oligomerization	4	11.4286	0.0383835	CCK, HIST1H3A, COL1A1, HIST1H4I	27	524	18082	5.11224	1	0.541449	47.0745
GOTERM_BP_ALL	GO:0071822~protein complex subunit organization	6	17.1429	0.0481052	TPPP3, NES, CCK, HIST1H3A, COL1A1, HIST1H4I	27	1414	18082	2.84174	1	0.566608	55.1333
GOTERM_BP_ALL	GO:0043933~macromolecular complex subunit organization	7	20	0.0920282	TPPP3, NES, CCK, HIST1H3A, COL1A1, HIST1H4I, TAF6L	27	2229	18082	2.10315	1	0.617715	79.1844
GOTERM_BP_ALL	GO:0006461~protein complex assembly	5	14.2857	0.107259	TPPP3, CCK, HIST1H3A, COL1A1, HIST1H4I	27	1277	18082	2.62218	1	0.649008	84.1893
GOTERM_BP_ALL	GO:0070271~protein complex biogenesis	5	14.2857	0.107492	TPPP3, CCK, HIST1H3A, COL1A1, HIST1H4I	27	1278	18082	2.62012	1	0.647159	84.2561
GOTERM_BP_ALL	GO:0065003~macromolecular complex assembly	5	14.2857	0.177288	TPPP3, CCK, HIST1H3A, COL1A1, HIST1H4I	27	1544	18082	2.16873	1	0.755256	95.8101
GOTERM_BP_ALL	GO:0010628~positive regulation of gene expression	5	14.2857	0.226877	CDKN1C, HIST1H3A, COL1A1, HIST1H4I, PIN1	27	1708	18082	1.96049	1	0.799438	98.475
GOTERM_BP_ALL	GO:0022607~cellular component assembly	6	17.1429	0.262401	TPPP3, CCK, HIST1H3A, CDC20, COL1A1, HIST1H4I	27	2418	18082	1.6618	1	0.821035	99.2901
GOTERM_BP_ALL	GO:0044085~cellular component biogenesis	6	17.1429	0.331866	TPPP3, CCK, HIST1H3A, CDC20, COL1A1, HIST1H4I	27	2654	18082	1.51402	1	0.880743	99.8578
GOTERM_BP_ALL	GO:0034622~cellular macromolecular complex assembly	3	8.57143	0.366937	TPPP3, HIST1H3A, HIST1H4I	27	887	18082	2.26506	1	0.899246	99.9408
Annotation Cluster 9	Enrichment Score: 0.9266113061408828
Category	Term	Count	%	PValue	Genes	List Total	Pop Hits	Pop Total	Fold Enrichment	Bonferroni	Benjamini	FDR
GOTERM_BP_ALL	GO:0050790~regulation of catalytic activity	7	20	0.0276667	GPX1, NES, CCND1, CCK, SPRED3, CDC20, PIN1	27	1662	18082	2.82065	1	0.567581	36.6257
GOTERM_BP_ALL	GO:0043523~regulation of neuron apoptotic process	3	8.57143	0.0487164	GPX1, NES, PIN1	27	247	18082	8.13405	1	0.561641	55.5993
GOTERM_BP_ALL	GO:0042981~regulation of apoptotic process	6	17.1429	0.0569124	GPX1, SEPT4, NES, CCK, TNFRSF12A, PIN1	27	1482	18082	2.71135	1	0.574757	61.4258
GOTERM_BP_ALL	GO:0043067~regulation of programmed cell death	6	17.1429	0.0591158	GPX1, SEPT4, NES, CCK, TNFRSF12A, PIN1	27	1498	18082	2.68239	1	0.57246	62.8651
GOTERM_BP_ALL	GO:0010941~regulation of cell death	6	17.1429	0.0775675	GPX1, SEPT4, NES, CCK, TNFRSF12A, PIN1	27	1620	18082	2.48038	1	0.601952	73.0879
GOTERM_BP_ALL	GO:1901214~regulation of neuron death	3	8.57143	0.0784892	GPX1, NES, PIN1	27	324	18082	6.20096	1	0.593376	73.5217
GOTERM_BP_ALL	GO:0070997~neuron death	3	8.57143	0.0908893	GPX1, NES, PIN1	27	353	18082	5.69153	1	0.61584	78.7558
GOTERM_BP_ALL	GO:0006915~apoptotic process	6	17.1429	0.105953	GPX1, SEPT4, NES, CCK, TNFRSF12A, PIN1	27	1779	18082	2.2587	1	0.649686	83.809
GOTERM_BP_ALL	GO:0012501~programmed cell death	6	17.1429	0.124333	GPX1, SEPT4, NES, CCK, TNFRSF12A, PIN1	27	1870	18082	2.14878	1	0.670716	88.4491
GOTERM_BP_ALL	GO:0044092~negative regulation of molecular function	4	11.4286	0.144489	GPX1, NES, SPRED3, PIN1	27	922	18082	2.90544	1	0.701491	92.0895
GOTERM_BP_ALL	GO:0008219~cell death	6	17.1429	0.153815	GPX1, SEPT4, NES, CCK, TNFRSF12A, PIN1	27	2003	18082	2.0061	1	0.721431	93.3806
GOTERM_BP_ALL	GO:0043086~negative regulation of catalytic activity	3	8.57143	0.244534	GPX1, NES, SPRED3	27	659	18082	3.04873	1	0.81734	98.9525
GOTERM_BP_ALL	GO:0043066~negative regulation of apoptotic process	3	8.57143	0.39261	GPX1, NES, PIN1	27	936	18082	2.14649	1	0.908211	99.9698
GOTERM_BP_ALL	GO:0043069~negative regulation of programmed cell death	3	8.57143	0.40039	GPX1, NES, PIN1	27	951	18082	2.11263	1	0.91209	99.9755
GOTERM_BP_ALL	GO:0060548~negative regulation of cell death	3	8.57143	0.446651	GPX1, NES, PIN1	27	1042	18082	1.92813	1	0.930184	99.9934
Annotation Cluster 10	Enrichment Score: 0.8877418619128185
Category	Term	Count	%	PValue	Genes	List Total	Pop Hits	Pop Total	Fold Enrichment	Bonferroni	Benjamini	FDR
GOTERM_BP_ALL	GO:0009888~tissue development	7	20	0.0477105	CDKN1C, MYL6, GPX1, CCND1, KRT10, COL1A1, PIN1	27	1889	18082	2.4817	1	0.573488	54.8299
GOTERM_BP_ALL	GO:0006928~movement of cell or subcellular component	6	17.1429	0.0955875	MYL6, GPX1, CCK, TNFRSF12A, COL1A1, PIN1	27	1724	18082	2.33076	1	0.629474	80.472
GOTERM_BP_ALL	GO:0007517~muscle organ development	3	8.57143	0.106576	MYL6, GPX1, PIN1	27	388	18082	5.17812	1	0.649233	83.9914
GOTERM_BP_ALL	GO:0014706~striated muscle tissue development	3	8.57143	0.118207	MYL6, GPX1, PIN1	27	413	18082	4.86468	1	0.658358	87.063
GOTERM_BP_ALL	GO:0060537~muscle tissue development	3	8.57143	0.130153	MYL6, GPX1, PIN1	27	438	18082	4.58701	1	0.68138	89.6359
GOTERM_BP_ALL	GO:0061061~muscle structure development	3	8.57143	0.237012	MYL6, GPX1, PIN1	27	645	18082	3.1149	1	0.807571	98.7694
GOTERM_BP_ALL	GO:0003008~system process	6	17.1429	0.344559	MYL6, GPX1, CCK, RIN1, COL1A1, PIN1	27	2696	18082	1.49044	1	0.886145	99.8959
Annotation Cluster 11	Enrichment Score: 0.8540368796773107
Category	Term	Count	%	PValue	Genes	List Total	Pop Hits	Pop Total	Fold Enrichment	Bonferroni	Benjamini	FDR
GOTERM_CC_ALL	GO:0043025~neuronal cell body	4	11.4286	0.0845718	CCK, CPNE6, RIN1, VGF	33	639	19662	3.72969	1	0.970308	66.933
GOTERM_CC_ALL	GO:0044297~cell body	4	11.4286	0.112339	CCK, CPNE6, RIN1, VGF	33	724	19662	3.29181	1	0.966214	77.5165
GOTERM_CC_ALL	GO:0097458~neuron part	6	17.1429	0.118962	GPX1, CCK, CPNE6, RIN1, VGF, PIN1	33	1620	19662	2.20673	1	0.95717	79.5293
GOTERM_CC_ALL	GO:0042995~cell projection	7	20	0.123943	SEPT4, CCK, TNFRSF12A, CPNE6, RIN1, VGF, PIN1	33	2120	19662	1.96732	1	0.94638	80.9324
GOTERM_CC_ALL	GO:0043005~neuron projection	5	14.2857	0.143893	CCK, CPNE6, RIN1, VGF, PIN1	33	1253	19662	2.37757	1	0.907284	85.7111
GOTERM_CC_ALL	GO:0036477~somatodendritic compartment	4	11.4286	0.187657	CCK, CPNE6, RIN1, VGF	33	921	19662	2.5877	1	0.936534	92.5936
GOTERM_CC_ALL	GO:0030425~dendrite	3	8.57143	0.27794	CCK, CPNE6, RIN1	33	637	19662	2.80605	1	0.925141	98.3064
Annotation Cluster 12	Enrichment Score: 0.8496141493396925
Category	Term	Count	%	PValue	Genes	List Total	Pop Hits	Pop Total	Fold Enrichment	Bonferroni	Benjamini	FDR
GOTERM_BP_ALL	GO:0000302~response to reactive oxygen species	3	8.57143	0.0372918	GPX1, ROMO1, COL1A1	27	213	18082	9.43245	1	0.554434	46.0892
GOTERM_BP_ALL	GO:0009605~response to external stimulus	8	22.8571	0.0394726	GPX1, CCND1, CCK, NFKBIB, HIST1H3A, ROMO1, COL1A1, VGF	27	2301	18082	2.32839	1	0.546029	48.0406
GOTERM_BP_ALL	GO:1901700~response to oxygen-containing compound	6	17.1429	0.0859703	GPX1, CCND1, NFKBIB, ROMO1, COL1A1, VGF	27	1670	18082	2.40612	1	0.60942	76.808
GOTERM_BP_ALL	GO:0006979~response to oxidative stress	3	8.57143	0.119152	GPX1, ROMO1, COL1A1	27	415	18082	4.84123	1	0.658983	87.2865
GOTERM_BP_ALL	GO:0051707~response to other organism	4	11.4286	0.181268	GPX1, NFKBIB, HIST1H3A, ROMO1	27	1027	18082	2.60839	1	0.757818	96.1277
GOTERM_BP_ALL	GO:0043207~response to external biotic stimulus	4	11.4286	0.18163	GPX1, NFKBIB, HIST1H3A, ROMO1	27	1028	18082	2.60585	1	0.756643	96.1556
GOTERM_BP_ALL	GO:1901701~cellular response to oxygen-containing compound	4	11.4286	0.194464	GPX1, NFKBIB, ROMO1, COL1A1	27	1063	18082	2.52005	1	0.773046	97.0267
GOTERM_BP_ALL	GO:0009607~response to biotic stimulus	4	11.4286	0.202281	GPX1, NFKBIB, HIST1H3A, ROMO1	27	1084	18082	2.47123	1	0.777022	97.4626
GOTERM_BP_ALL	GO:0009617~response to bacterium	3	8.57143	0.251531	GPX1, NFKBIB, ROMO1	27	672	18082	2.98975	1	0.817151	99.0995
GOTERM_BP_ALL	GO:0051704~multi-organism process	6	17.1429	0.25529	GPX1, SEPT4, NFKBIB, HIST1H3A, ROMO1, VGF	27	2393	18082	1.67916	1	0.818177	99.1703
GOTERM_BP_ALL	GO:0006952~defense response	4	11.4286	0.359713	GPX1, CCK, HIST1H3A, ROMO1	27	1481	18082	1.80879	1	0.895248	99.9288
Annotation Cluster 13	Enrichment Score: 0.8044167150973267
Category	Term	Count	%	PValue	Genes	List Total	Pop Hits	Pop Total	Fold Enrichment	Bonferroni	Benjamini	FDR
GOTERM_BP_ALL	GO:0031667~response to nutrient levels	4	11.4286	0.023148	CCND1, CCK, COL1A1, VGF	27	430	18082	6.2298	1	0.548141	31.6643
GOTERM_BP_ALL	GO:0009991~response to extracellular stimulus	4	11.4286	0.0278692	CCND1, CCK, COL1A1, VGF	27	462	18082	5.7983	1	0.561739	36.8399
GOTERM_BP_ALL	GO:0007267~cell-cell signaling	6	17.1429	0.0347295	CCND1, RIN1, CDC20, COL1A1, VGF, PIN1	27	1294	18082	3.10527	1	0.566987	43.7086
GOTERM_BP_ALL	GO:1901700~response to oxygen-containing compound	6	17.1429	0.0859703	GPX1, CCND1, NFKBIB, ROMO1, COL1A1, VGF	27	1670	18082	2.40612	1	0.60942	76.808
GOTERM_BP_ALL	GO:0071310~cellular response to organic substance	6	17.1429	0.177874	CDKN1C, GPX1, CCND1, NFKBIB, COL1A1, PIN1	27	2103	18082	1.91071	1	0.754536	95.8584
GOTERM_BP_ALL	GO:0009719~response to endogenous stimulus	5	14.2857	0.196141	CDKN1C, CCND1, COL1A1, VGF, PIN1	27	1608	18082	2.08241	1	0.774439	97.1258
GOTERM_BP_ALL	GO:0009628~response to abiotic stimulus	4	11.4286	0.226585	GPX1, CCND1, COL1A1, VGF	27	1148	18082	2.33346	1	0.800571	98.4656
GOTERM_BP_ALL	GO:0010033~response to organic substance	7	20	0.247034	CDKN1C, GPX1, CCND1, NFKBIB, COL1A1, VGF, PIN1	27	2972	18082	1.57736	1	0.81652	99.0074
GOTERM_BP_ALL	GO:0009725~response to hormone	3	8.57143	0.332371	CCND1, COL1A1, VGF	27	822	18082	2.44417	1	0.880153	99.8596
GOTERM_BP_ALL	GO:0010243~response to organonitrogen compound	3	8.57143	0.362182	CCND1, COL1A1, VGF	27	878	18082	2.28828	1	0.896333	99.9332
GOTERM_BP_ALL	GO:0033993~response to lipid	3	8.57143	0.420932	CCND1, NFKBIB, COL1A1	27	991	18082	2.02736	1	0.919603	99.9861
GOTERM_BP_ALL	GO:1901698~response to nitrogen compound	3	8.57143	0.42754	CCND1, COL1A1, VGF	27	1004	18082	2.00111	1	0.923027	99.9885
GOTERM_BP_ALL	GO:0014070~response to organic cyclic compound	3	8.57143	0.428047	CCND1, COL1A1, VGF	27	1005	18082	1.99912	1	0.922618	99.9886
Annotation Cluster 14	Enrichment Score: 0.747758035661331
Category	Term	Count	%	PValue	Genes	List Total	Pop Hits	Pop Total	Fold Enrichment	Bonferroni	Benjamini	FDR
GOTERM_BP_ALL	GO:0010646~regulation of cell communication	12	34.2857	0.000922886	CDKN1C, GPX1, SEPT4, CCND1, TNFRSF12A, NFKBIB, RIN1, SPRED3, CDC20, COL1A1, VGF, PIN1	27	2785	18082	2.88562	0.686124	0.320401	1.4898
GOTERM_BP_ALL	GO:0023051~regulation of signaling	12	34.2857	0.00099048	CDKN1C, GPX1, SEPT4, CCND1, TNFRSF12A, NFKBIB, RIN1, SPRED3, CDC20, COL1A1, VGF, PIN1	27	2808	18082	2.86198	0.711676	0.267225	1.5981
GOTERM_BP_ALL	GO:0042127~regulation of cell proliferation	9	25.7143	0.00159843	CDKN1C, GPX1, NES, CCND1, CCK, ROMO1, CDC20, H19, PIN1	27	1642	18082	3.67073	0.865694	0.284379	2.56709
GOTERM_BP_ALL	GO:0051239~regulation of multicellular organismal process	11	31.4286	0.00384322	CDKN1C, GPX1, CCND1, CCK, TNFRSF12A, CPNE6, CDC20, COL1A1, HIST1H4I, H19, PIN1	27	2804	18082	2.62723	0.992034	0.331495	6.06798
GOTERM_BP_ALL	GO:2000026~regulation of multicellular organismal development	9	25.7143	0.00387875	CDKN1C, GPX1, CCND1, TNFRSF12A, CPNE6, CDC20, COL1A1, HIST1H4I, PIN1	27	1888	18082	3.19244	0.992382	0.312832	6.12244
GOTERM_BP_ALL	GO:0031398~positive regulation of protein ubiquitination	3	8.57143	0.00991233	SEPT4, CDC20, PIN1	27	105	18082	19.1344	0.999996	0.464793	14.9514
GOTERM_BP_ALL	GO:0045595~regulation of cell differentiation	8	22.8571	0.0115973	CDKN1C, CCND1, TNFRSF12A, CPNE6, CDC20, COL1A1, HIST1H4I, PIN1	27	1802	18082	2.97316	1	0.501987	17.2741
GOTERM_BP_ALL	GO:0048583~regulation of response to stimulus	11	31.4286	0.0131624	CDKN1C, GPX1, SEPT4, CCND1, CCK, TNFRSF12A, NFKBIB, HIST1H3A, SPRED3, COL1A1, PIN1	27	3327	18082	2.21423	1	0.530384	19.3781
GOTERM_BP_ALL	GO:1903322~positive regulation of protein modification by small protein conjugation or removal	3	8.57143	0.0136155	SEPT4, CDC20, PIN1	27	124	18082	16.2025	1	0.526705	19.9777
GOTERM_BP_ALL	GO:0008283~cell proliferation	8	22.8571	0.0142296	CDKN1C, GPX1, NES, CCND1, CCK, ROMO1, CDC20, H19	27	1874	18082	2.85893	1	0.512982	20.7838
GOTERM_BP_ALL	GO:0009966~regulation of signal transduction	9	25.7143	0.0190316	CDKN1C, GPX1, SEPT4, CCND1, TNFRSF12A, NFKBIB, SPRED3, COL1A1, PIN1	27	2468	18082	2.44219	1	0.564624	26.8293
GOTERM_BP_ALL	GO:0009893~positive regulation of metabolic process	10	28.5714	0.0200653	CDKN1C, SEPT4, CCND1, CCK, HIST1H3A, ROMO1, CDC20, COL1A1, HIST1H4I, PIN1	27	3004	18082	2.22937	1	0.559824	28.0727
GOTERM_BP_ALL	GO:0051291~protein heterooligomerization	3	8.57143	0.0202395	HIST1H3A, COL1A1, HIST1H4I	27	153	18082	13.1314	1	0.551529	28.2803
GOTERM_BP_ALL	GO:1902532~negative regulation of intracellular signal transduction	4	11.4286	0.0274061	GPX1, NFKBIB, SPRED3, PIN1	27	459	18082	5.8362	1	0.572843	36.349
GOTERM_BP_ALL	GO:0050790~regulation of catalytic activity	7	20	0.0276667	GPX1, NES, CCND1, CCK, SPRED3, CDC20, PIN1	27	1662	18082	2.82065	1	0.567581	36.6257
GOTERM_BP_ALL	GO:0031396~regulation of protein ubiquitination	3	8.57143	0.0282352	SEPT4, CDC20, PIN1	27	183	18082	10.9787	1	0.558215	37.2254
GOTERM_BP_ALL	GO:0065009~regulation of molecular function	8	22.8571	0.0319001	GPX1, NES, CCND1, CCK, SPRED3, CDC20, TAF6L, PIN1	27	2201	18082	2.43418	1	0.556803	40.9654
GOTERM_BP_ALL	GO:0071560~cellular response to transforming growth factor beta stimulus	3	8.57143	0.0338541	CDKN1C, COL1A1, PIN1	27	202	18082	9.94609	1	0.564476	42.8729
GOTERM_BP_ALL	GO:0007267~cell-cell signaling	6	17.1429	0.0347295	CCND1, RIN1, CDC20, COL1A1, VGF, PIN1	27	1294	18082	3.10527	1	0.566987	43.7086
GOTERM_BP_ALL	GO:0071559~response to transforming growth factor beta	3	8.57143	0.0347785	CDKN1C, COL1A1, PIN1	27	205	18082	9.80054	1	0.560742	43.7551
GOTERM_BP_ALL	GO:1903320~regulation of protein modification by small protein conjugation or removal	3	8.57143	0.0360265	SEPT4, CDC20, PIN1	27	209	18082	9.61297	1	0.567093	44.9257
GOTERM_BP_ALL	GO:0031323~regulation of cellular metabolic process	14	40	0.0364587	SEPT4, CCK, ROMO1, CDC20, TAF6L, PIN1, H19, CDKN1C, GPX1, CCND1, HIST1H3A, SPRED3, COL1A1, HIST1H4I	27	5673	18082	1.65271	1	0.558567	45.3258
GOTERM_BP_ALL	GO:0010564~regulation of cell cycle process	4	11.4286	0.0369261	CDKN1C, CCND1, CDC20, PIN1	27	516	18082	5.1915	1	0.556975	45.7553
GOTERM_BP_ALL	GO:0010604~positive regulation of macromolecule metabolic process	9	25.7143	0.0374452	CDKN1C, SEPT4, CCND1, CCK, HIST1H3A, CDC20, COL1A1, HIST1H4I, PIN1	27	2794	18082	2.15724	1	0.549893	46.2287
GOTERM_BP_ALL	GO:0009967~positive regulation of signal transduction	6	17.1429	0.0382431	CDKN1C, GPX1, SEPT4, TNFRSF12A, COL1A1, PIN1	27	1328	18082	3.02577	1	0.545839	46.9487
GOTERM_BP_ALL	GO:0048585~negative regulation of response to stimulus	6	17.1429	0.0406319	GPX1, CCND1, CCK, NFKBIB, SPRED3, PIN1	27	1350	18082	2.97646	1	0.551072	49.0508
GOTERM_BP_ALL	GO:0060070~canonical Wnt signaling pathway	3	8.57143	0.0411896	CCND1, COL1A1, PIN1	27	225	18082	8.92938	1	0.550587	49.5301
GOTERM_BP_ALL	GO:0008284~positive regulation of cell proliferation	5	14.2857	0.0440283	NES, CCND1, CCK, ROMO1, CDC20	27	943	18082	3.55092	1	0.559114	51.9051
GOTERM_BP_ALL	GO:0051301~cell division	4	11.4286	0.0441114	SEPT4, CCND1, CDC20, PIN1	27	554	18082	4.83541	1	0.55462	51.9731
GOTERM_BP_ALL	GO:0010605~negative regulation of macromolecule metabolic process	8	22.8571	0.0455392	CDKN1C, GPX1, CCND1, HIST1H3A, SPRED3, HIST1H4I, H19, PIN1	27	2372	18082	2.2587	1	0.561265	53.1262
GOTERM_BP_ALL	GO:0030111~regulation of Wnt signaling pathway	3	8.57143	0.0480125	CCND1, COL1A1, PIN1	27	245	18082	8.20045	1	0.570826	55.0622
GOTERM_BP_ALL	GO:0007049~cell cycle	6	17.1429	0.0513664	CDKN1C, SEPT4, NES, CCND1, CDC20, PIN1	27	1440	18082	2.79043	1	0.562747	57.568
GOTERM_BP_ALL	GO:0048519~negative regulation of biological process	12	34.2857	0.0560558	CDKN1C, GPX1, NES, CCND1, CCK, NFKBIB, HIST1H3A, SPRED3, COL1A1, HIST1H4I, H19, PIN1	27	4757	18082	1.68939	1	0.577637	60.8523
GOTERM_BP_ALL	GO:0009968~negative regulation of signal transduction	5	14.2857	0.0567795	GPX1, CCND1, NFKBIB, SPRED3, PIN1	27	1025	18082	3.26685	1	0.578137	61.3374
GOTERM_BP_ALL	GO:0010647~positive regulation of cell communication	6	17.1429	0.0580079	CDKN1C, GPX1, SEPT4, TNFRSF12A, COL1A1, PIN1	27	1490	18082	2.69679	1	0.577697	62.1478
GOTERM_BP_ALL	GO:0023056~positive regulation of signaling	6	17.1429	0.0589767	CDKN1C, GPX1, SEPT4, TNFRSF12A, COL1A1, PIN1	27	1497	18082	2.68418	1	0.575639	62.7757
GOTERM_BP_ALL	GO:0021700~developmental maturation	3	8.57143	0.0608643	CDKN1C, SEPT4, CDC20	27	280	18082	7.1754	1	0.571472	63.9712
GOTERM_BP_ALL	GO:0019222~regulation of metabolic process	14	40	0.0634112	SEPT4, CCK, ROMO1, CDC20, TAF6L, PIN1, H19, CDKN1C, GPX1, CCND1, HIST1H3A, SPRED3, COL1A1, HIST1H4I	27	6098	18082	1.53753	1	0.57532	65.5272
GOTERM_BP_ALL	GO:0009892~negative regulation of metabolic process	8	22.8571	0.0666971	CDKN1C, GPX1, CCND1, HIST1H3A, SPRED3, HIST1H4I, H19, PIN1	27	2579	18082	2.07741	1	0.590599	67.4416
GOTERM_BP_ALL	GO:0031401~positive regulation of protein modification process	5	14.2857	0.0667269	SEPT4, CCND1, CCK, CDC20, PIN1	27	1082	18082	3.09475	1	0.587021	67.4585
GOTERM_BP_ALL	GO:0043412~macromolecule modification	10	28.5714	0.0687952	GPX1, SEPT4, CCND1, CCK, HIST1H3A, SPRED3, CDC20, HIST1H4I, TAF6L, PIN1	27	3719	18082	1.80076	1	0.591194	68.6113
GOTERM_BP_ALL	GO:0022402~cell cycle process	5	14.2857	0.0717458	CDKN1C, NES, CCND1, CDC20, PIN1	27	1109	18082	3.0194	1	0.599893	70.1897
GOTERM_BP_ALL	GO:0040029~regulation of gene expression, epigenetic	3	8.57143	0.0719049	GPX1, HIST1H3A, HIST1H4I	27	308	18082	6.52309	1	0.597161	70.2726
GOTERM_BP_ALL	GO:0044772~mitotic cell cycle phase transition	3	8.57143	0.075585	CDKN1C, NES, CCND1	27	317	18082	6.33789	1	0.605654	72.132
GOTERM_CC_ALL	GO:0005654~nucleoplasm	8	22.8571	0.0761892	HYPK, SEPT4, CCND1, HIST1H3A, CDC20, HIST1H4I, TAF6L, PIN1	33	2325	19662	2.05013	1	0.980602	62.9342
GOTERM_BP_ALL	GO:0031399~regulation of protein modification process	6	17.1429	0.0772415	SEPT4, CCND1, CCK, SPRED3, CDC20, PIN1	27	1618	18082	2.48345	1	0.607075	72.9329
GOTERM_BP_ALL	GO:0080090~regulation of primary metabolic process	13	37.1429	0.0774271	SEPT4, CCK, CDC20, TAF6L, PIN1, H19, CDKN1C, GPX1, CCND1, HIST1H3A, SPRED3, COL1A1, HIST1H4I	27	5629	18082	1.54666	1	0.604609	73.0212
GOTERM_BP_ALL	GO:1903047~mitotic cell cycle process	4	11.4286	0.0782022	CDKN1C, NES, CCND1, CDC20	27	702	18082	3.81598	1	0.595203	73.3873
GOTERM_BP_ALL	GO:0048523~negative regulation of cellular process	11	31.4286	0.0795671	CDKN1C, GPX1, NES, CCND1, NFKBIB, HIST1H3A, SPRED3, COL1A1, HIST1H4I, H19, PIN1	27	4417	18082	1.66782	1	0.595383	74.0208
GOTERM_BP_ALL	GO:0010648~negative regulation of cell communication	5	14.2857	0.0817563	GPX1, CCND1, NFKBIB, SPRED3, PIN1	27	1160	18082	2.88665	1	0.599439	75.0072
GOTERM_BP_ALL	GO:0023057~negative regulation of signaling	5	14.2857	0.0825704	GPX1, CCND1, NFKBIB, SPRED3, PIN1	27	1164	18082	2.87673	1	0.597019	75.3651
GOTERM_BP_ALL	GO:0060255~regulation of macromolecule metabolic process	13	37.1429	0.0880185	SEPT4, CCK, CDC20, TAF6L, PIN1, H19, CDKN1C, GPX1, CCND1, HIST1H3A, SPRED3, COL1A1, HIST1H4I	27	5739	18082	1.51701	1	0.615427	77.6386
GOTERM_BP_ALL	GO:0044770~cell cycle phase transition	3	8.57143	0.0895802	CDKN1C, NES, CCND1	27	350	18082	5.74032	1	0.619176	78.253
GOTERM_BP_ALL	GO:0031325~positive regulation of cellular metabolic process	8	22.8571	0.0908821	CDKN1C, SEPT4, CCND1, CCK, ROMO1, CDC20, COL1A1, PIN1	27	2769	18082	1.93486	1	0.618762	78.7531
GOTERM_BP_ALL	GO:0051338~regulation of transferase activity	4	11.4286	0.0971703	CCND1, SPRED3, CDC20, PIN1	27	771	18082	3.47447	1	0.632947	81.0202
GOTERM_BP_ALL	GO:0000278~mitotic cell cycle	4	11.4286	0.101823	CDKN1C, NES, CCND1, CDC20	27	787	18082	3.40383	1	0.642563	82.5493
GOTERM_BP_ALL	GO:0032268~regulation of cellular protein metabolic process	7	20	0.103193	GPX1, SEPT4, CCND1, CCK, SPRED3, CDC20, PIN1	27	2298	18082	2.04	1	0.644958	82.9771
GOTERM_BP_ALL	GO:0016055~Wnt signaling pathway	3	8.57143	0.107494	CCND1, COL1A1, PIN1	27	390	18082	5.15157	1	0.644493	84.2567
GOTERM_BP_ALL	GO:0198738~cell-cell signaling by wnt	3	8.57143	0.107954	CCND1, COL1A1, PIN1	27	391	18082	5.13839	1	0.643501	84.3881
GOTERM_BP_ALL	GO:0003006~developmental process involved in reproduction	4	11.4286	0.114465	CDKN1C, SEPT4, CCND1, VGF	27	829	18082	3.23138	1	0.661083	86.141
GOTERM_BP_ALL	GO:0051726~regulation of cell cycle	4	11.4286	0.11601	CDKN1C, CCND1, CDC20, PIN1	27	834	18082	3.21201	1	0.661149	86.5289
GOTERM_BP_ALL	GO:0048584~positive regulation of response to stimulus	6	17.1429	0.116881	CDKN1C, GPX1, SEPT4, TNFRSF12A, COL1A1, PIN1	27	1834	18082	2.19096	1	0.658976	86.7432
GOTERM_BP_ALL	GO:0031324~negative regulation of cellular metabolic process	7	20	0.117402	CDKN1C, GPX1, CCND1, HIST1H3A, SPRED3, HIST1H4I, PIN1	27	2380	18082	1.96972	1	0.658191	86.8697
GOTERM_BP_ALL	GO:0032270~positive regulation of cellular protein metabolic process	5	14.2857	0.120902	SEPT4, CCND1, CCK, CDC20, PIN1	27	1334	18082	2.51013	1	0.662219	87.6911
GOTERM_BP_ALL	GO:0042326~negative regulation of phosphorylation	3	8.57143	0.131121	CDKN1C, SPRED3, PIN1	27	440	18082	4.56616	1	0.681905	89.8218
GOTERM_BP_ALL	GO:0051246~regulation of protein metabolic process	7	20	0.136661	GPX1, SEPT4, CCND1, CCK, SPRED3, CDC20, PIN1	27	2483	18082	1.88801	1	0.691073	90.8271
GOTERM_BP_ALL	GO:0042325~regulation of phosphorylation	5	14.2857	0.139463	CDKN1C, CCND1, CCK, SPRED3, PIN1	27	1407	18082	2.3799	1	0.696701	91.2992
GOTERM_BP_ALL	GO:1905114~cell surface receptor signaling pathway involved in cell-cell signaling	3	8.57143	0.143368	CCND1, COL1A1, PIN1	27	465	18082	4.32067	1	0.705191	91.9193
GOTERM_BP_ALL	GO:0044092~negative regulation of molecular function	4	11.4286	0.144489	GPX1, NES, SPRED3, PIN1	27	922	18082	2.90544	1	0.701491	92.0895
GOTERM_BP_ALL	GO:0051247~positive regulation of protein metabolic process	5	14.2857	0.145017	SEPT4, CCND1, CCK, CDC20, PIN1	27	1428	18082	2.3449	1	0.700696	92.1686
GOTERM_BP_ALL	GO:0048608~reproductive structure development	3	8.57143	0.155858	CDKN1C, CCND1, VGF	27	490	18082	4.10023	1	0.72438	93.6358
GOTERM_BP_ALL	GO:0051347~positive regulation of transferase activity	3	8.57143	0.157878	CCND1, CDC20, PIN1	27	494	18082	4.06703	1	0.727216	93.8788
GOTERM_BP_ALL	GO:0061458~reproductive system development	3	8.57143	0.158383	CDKN1C, CCND1, VGF	27	495	18082	4.05881	1	0.726324	93.9383
GOTERM_BP_ALL	GO:0043085~positive regulation of catalytic activity	4	11.4286	0.159217	CCND1, CCK, CDC20, PIN1	27	965	18082	2.77597	1	0.726239	94.0351
GOTERM_MF_ALL	GO:0032403~protein complex binding	4	11.4286	0.161786	NES, CCND1, HIST1H3A, CDC20	28	903	17446	2.76001	1	0.99928	88.2342
GOTERM_MF_ALL	GO:0030234~enzyme regulator activity	4	11.4286	0.17052	CDKN1C, CCND1, RIN1, CDC20	28	926	17446	2.69145	1	0.997828	89.6377
GOTERM_BP_ALL	GO:0044702~single organism reproductive process	5	14.2857	0.171827	CDKN1C, SEPT4, CCND1, CDC20, VGF	27	1525	18082	2.19575	1	0.747322	95.3344
GOTERM_BP_ALL	GO:0071310~cellular response to organic substance	6	17.1429	0.177874	CDKN1C, GPX1, CCND1, NFKBIB, COL1A1, PIN1	27	2103	18082	1.91071	1	0.754536	95.8584
GOTERM_BP_ALL	GO:1902531~regulation of intracellular signal transduction	5	14.2857	0.179606	GPX1, SEPT4, NFKBIB, SPRED3, PIN1	27	1552	18082	2.15755	1	0.756264	95.998
GOTERM_BP_ALL	GO:0010563~negative regulation of phosphorus metabolic process	3	8.57143	0.191878	CDKN1C, SPRED3, PIN1	27	560	18082	3.5877	1	0.773583	96.8676
GOTERM_BP_ALL	GO:0045936~negative regulation of phosphate metabolic process	3	8.57143	0.191878	CDKN1C, SPRED3, PIN1	27	560	18082	3.5877	1	0.773583	96.8676
GOTERM_BP_ALL	GO:0009719~response to endogenous stimulus	5	14.2857	0.196141	CDKN1C, CCND1, COL1A1, VGF, PIN1	27	1608	18082	2.08241	1	0.774439	97.1258
GOTERM_BP_ALL	GO:0051276~chromosome organization	4	11.4286	0.198921	HIST1H3A, CDC20, HIST1H4I, TAF6L	27	1075	18082	2.49192	1	0.774294	97.2831
GOTERM_BP_ALL	GO:0010629~negative regulation of gene expression	5	14.2857	0.20217	CDKN1C, CCND1, HIST1H3A, HIST1H4I, H19	27	1628	18082	2.05683	1	0.77859	97.4569
GOTERM_BP_ALL	GO:0019220~regulation of phosphate metabolic process	5	14.2857	0.203384	CDKN1C, CCND1, CCK, SPRED3, PIN1	27	1632	18082	2.05179	1	0.775539	97.519
GOTERM_BP_ALL	GO:0051174~regulation of phosphorus metabolic process	5	14.2857	0.203687	CDKN1C, CCND1, CCK, SPRED3, PIN1	27	1633	18082	2.05053	1	0.774349	97.5343
GOTERM_BP_ALL	GO:0071363~cellular response to growth factor stimulus	3	8.57143	0.212448	CDKN1C, COL1A1, PIN1	27	599	18082	3.35411	1	0.788384	97.9402
GOTERM_BP_ALL	GO:0022414~reproductive process	5	14.2857	0.215028	CDKN1C, SEPT4, CCND1, CDC20, VGF	27	1670	18082	2.0051	1	0.791165	98.0472
GOTERM_BP_ALL	GO:0000003~reproduction	5	14.2857	0.215647	CDKN1C, SEPT4, CCND1, CDC20, VGF	27	1672	18082	2.0027	1	0.790547	98.0721
GOTERM_BP_ALL	GO:0006464~cellular protein modification process	8	22.8571	0.219925	GPX1, SEPT4, CCND1, CCK, SPRED3, CDC20, TAF6L, PIN1	27	3474	18082	1.54221	1	0.794483	98.2361
GOTERM_BP_ALL	GO:0036211~protein modification process	8	22.8571	0.219925	GPX1, SEPT4, CCND1, CCK, SPRED3, CDC20, TAF6L, PIN1	27	3474	18082	1.54221	1	0.794483	98.2361
GOTERM_BP_ALL	GO:0007166~cell surface receptor signaling pathway	6	17.1429	0.223389	CDKN1C, GPX1, CCND1, TNFRSF12A, COL1A1, PIN1	27	2278	18082	1.76393	1	0.798596	98.3592
GOTERM_BP_ALL	GO:0070848~response to growth factor	3	8.57143	0.225231	CDKN1C, COL1A1, PIN1	27	623	18082	3.2249	1	0.799986	98.4213
GOTERM_CC_ALL	GO:0031974~membrane-enclosed lumen	9	25.7143	0.226485	HYPK, SEPT4, CCND1, HIST1H3A, CDC20, TIMM23, HIST1H4I, TAF6L, PIN1	33	3628	19662	1.47805	1	0.922328	95.9893
GOTERM_BP_ALL	GO:0033043~regulation of organelle organization	4	11.4286	0.226585	CDKN1C, GPX1, NES, CDC20	27	1148	18082	2.33346	1	0.800571	98.4656
GOTERM_BP_ALL	GO:0010628~positive regulation of gene expression	5	14.2857	0.226877	CDKN1C, HIST1H3A, COL1A1, HIST1H4I, PIN1	27	1708	18082	1.96049	1	0.799438	98.475
GOTERM_CC_ALL	GO:0031981~nuclear lumen	8	22.8571	0.241274	HYPK, SEPT4, CCND1, HIST1H3A, CDC20, HIST1H4I, TAF6L, PIN1	33	3139	19662	1.51849	1	0.908278	96.8506
GOTERM_BP_ALL	GO:0010033~response to organic substance	7	20	0.247034	CDKN1C, GPX1, CCND1, NFKBIB, COL1A1, VGF, PIN1	27	2972	18082	1.57736	1	0.81652	99.0074
GOTERM_BP_ALL	GO:0016567~protein ubiquitination	3	8.57143	0.248839	SEPT4, CDC20, PIN1	27	667	18082	3.01216	1	0.816192	99.0454
GOTERM_BP_ALL	GO:0045892~negative regulation of transcription, DNA-templated	4	11.4286	0.24953	CDKN1C, CCND1, HIST1H3A, HIST1H4I	27	1207	18082	2.2194	1	0.815728	99.0596
GOTERM_BP_ALL	GO:0035556~intracellular signal transduction	6	17.1429	0.251616	GPX1, SEPT4, NFKBIB, REM2, SPRED3, PIN1	27	2380	18082	1.68833	1	0.815822	99.1012
GOTERM_BP_ALL	GO:1903507~negative regulation of nucleic acid-templated transcription	4	11.4286	0.255433	CDKN1C, CCND1, HIST1H3A, HIST1H4I	27	1222	18082	2.19216	1	0.816951	99.1729
GOTERM_BP_ALL	GO:0010468~regulation of gene expression	9	25.7143	0.25659	CDKN1C, GPX1, CCND1, HIST1H3A, COL1A1, HIST1H4I, TAF6L, H19, PIN1	27	4268	18082	1.41221	1	0.815746	99.1935
GOTERM_BP_ALL	GO:1902679~negative regulation of RNA biosynthetic process	4	11.4286	0.261359	CDKN1C, CCND1, HIST1H3A, HIST1H4I	27	1237	18082	2.16557	1	0.820994	99.2737
GOTERM_BP_ALL	GO:0044093~positive regulation of molecular function	4	11.4286	0.274474	CCND1, CCK, CDC20, PIN1	27	1270	18082	2.1093	1	0.834314	99.4572
GOTERM_BP_ALL	GO:0032446~protein modification by small protein conjugation	3	8.57143	0.275814	SEPT4, CDC20, PIN1	27	717	18082	2.80211	1	0.834699	99.4732
GOTERM_BP_ALL	GO:0051253~negative regulation of RNA metabolic process	4	11.4286	0.279666	CDKN1C, CCND1, HIST1H3A, HIST1H4I	27	1283	18082	2.08793	1	0.836936	99.517
GOTERM_BP_ALL	GO:0006325~chromatin organization	3	8.57143	0.287697	HIST1H3A, HIST1H4I, TAF6L	27	739	18082	2.71869	1	0.844206	99.5975
GOTERM_BP_ALL	GO:0006351~transcription, DNA-templated	7	20	0.287745	CDKN1C, CCND1, HIST1H3A, COL1A1, HIST1H4I, TAF6L, PIN1	27	3129	18082	1.49822	1	0.842999	99.5979
GOTERM_BP_ALL	GO:0001932~regulation of protein phosphorylation	4	11.4286	0.290087	CCND1, CCK, SPRED3, PIN1	27	1309	18082	2.04646	1	0.844543	99.6189
GOTERM_MF_ALL	GO:0098772~molecular function regulator	4	11.4286	0.299147	CDKN1C, CCND1, RIN1, CDC20	28	1237	17446	2.01478	1	0.99994	98.6569
GOTERM_BP_ALL	GO:0019219~regulation of nucleobase-containing compound metabolic process	8	22.8571	0.328137	CDKN1C, CCND1, HIST1H3A, COL1A1, HIST1H4I, TAF6L, H19, PIN1	27	3924	18082	1.36535	1	0.878272	99.8444
GOTERM_BP_ALL	GO:0007167~enzyme linked receptor protein signaling pathway	3	8.57143	0.333442	CDKN1C, COL1A1, PIN1	27	824	18082	2.43824	1	0.8801	99.8632
GOTERM_BP_ALL	GO:0045934~negative regulation of nucleobase-containing compound metabolic process	4	11.4286	0.333738	CDKN1C, CCND1, HIST1H3A, HIST1H4I	27	1417	18082	1.89048	1	0.87932	99.8642
GOTERM_BP_ALL	GO:2000113~negative regulation of cellular macromolecule biosynthetic process	4	11.4286	0.344291	CDKN1C, CCND1, HIST1H3A, HIST1H4I	27	1443	18082	1.85642	1	0.887934	99.8952
GOTERM_BP_ALL	GO:0016310~phosphorylation	5	14.2857	0.344462	CDKN1C, CCND1, CCK, SPRED3, PIN1	27	2063	18082	1.62313	1	0.887073	99.8957
GOTERM_BP_ALL	GO:0070647~protein modification by small protein conjugation or removal	3	8.57143	0.345724	SEPT4, CDC20, PIN1	27	847	18082	2.37203	1	0.885163	99.8989
GOTERM_MF_ALL	GO:0019899~enzyme binding	5	14.2857	0.34681	CCND1, RIN1, CDC20, TIMM23, PIN1	28	1923	17446	1.62005	1	0.999574	99.4282
GOTERM_CC_ALL	GO:0070013~intracellular organelle lumen	8	22.8571	0.353126	HYPK, SEPT4, CCND1, HIST1H3A, CDC20, HIST1H4I, TAF6L, PIN1	33	3548	19662	1.34345	1	0.933391	99.5727
GOTERM_CC_ALL	GO:0043233~organelle lumen	8	22.8571	0.356848	HYPK, SEPT4, CCND1, HIST1H3A, CDC20, HIST1H4I, TAF6L, PIN1	33	3561	19662	1.33854	1	0.930165	99.6025
GOTERM_BP_ALL	GO:0010558~negative regulation of macromolecule biosynthetic process	4	11.4286	0.36985	CDKN1C, CCND1, HIST1H3A, HIST1H4I	27	1506	18082	1.77876	1	0.898807	99.9451
GOTERM_BP_ALL	GO:0001934~positive regulation of protein phosphorylation	3	8.57143	0.370101	CCND1, CCK, PIN1	27	893	18082	2.24984	1	0.898092	99.9455
GOTERM_CC_ALL	GO:0043234~protein complex	9	25.7143	0.370166	COPZ2, MYL6, CCND1, HIST1H3A, CDC20, COL1A1, TIMM23, HIST1H4I, TAF6L	33	4190	19662	1.2798	1	0.933184	99.6941
GOTERM_CC_ALL	GO:0044428~nuclear part	8	22.8571	0.375258	HYPK, SEPT4, CCND1, HIST1H3A, CDC20, HIST1H4I, TAF6L, PIN1	33	3625	19662	1.31491	1	0.931069	99.7237
GOTERM_BP_ALL	GO:0006355~regulation of transcription, DNA-templated	7	20	0.375407	CDKN1C, CCND1, HIST1H3A, COL1A1, HIST1H4I, TAF6L, PIN1	27	3449	18082	1.35921	1	0.899574	99.9525
GOTERM_BP_ALL	GO:1903506~regulation of nucleic acid-templated transcription	7	20	0.376247	CDKN1C, CCND1, HIST1H3A, COL1A1, HIST1H4I, TAF6L, PIN1	27	3452	18082	1.35803	1	0.899337	99.9535
GOTERM_BP_ALL	GO:2001141~regulation of RNA biosynthetic process	7	20	0.377929	CDKN1C, CCND1, HIST1H3A, COL1A1, HIST1H4I, TAF6L, PIN1	27	3458	18082	1.35568	1	0.89976	99.9555
GOTERM_BP_ALL	GO:0042327~positive regulation of phosphorylation	3	8.57143	0.39157	CCND1, CCK, PIN1	27	934	18082	2.15108	1	0.908295	99.969
GOTERM_BP_ALL	GO:0031327~negative regulation of cellular biosynthetic process	4	11.4286	0.393298	CDKN1C, CCND1, HIST1H3A, HIST1H4I	27	1564	18082	1.7128	1	0.907873	99.9704
GOTERM_BP_ALL	GO:0032269~negative regulation of cellular protein metabolic process	3	8.57143	0.402974	GPX1, SPRED3, PIN1	27	956	18082	2.10158	1	0.913077	99.9772
GOTERM_BP_ALL	GO:0097659~nucleic acid-templated transcription	7	20	0.403229	CDKN1C, CCND1, HIST1H3A, COL1A1, HIST1H4I, TAF6L, PIN1	27	3548	18082	1.32129	1	0.912451	99.9773
GOTERM_BP_ALL	GO:0051171~regulation of nitrogen compound metabolic process	8	22.8571	0.405461	CDKN1C, CCND1, HIST1H3A, COL1A1, HIST1H4I, TAF6L, H19, PIN1	27	4221	18082	1.26928	1	0.913192	99.9787
GOTERM_BP_ALL	GO:0009890~negative regulation of biosynthetic process	4	11.4286	0.405772	CDKN1C, CCND1, HIST1H3A, HIST1H4I	27	1595	18082	1.67951	1	0.912611	99.9789
GOTERM_CC_ALL	GO:0005634~nucleus	13	37.1429	0.40796	HYPK, SEPT4, NFKBIB, KRT10, CDC20, TAF6L, PIN1, CDKN1C, TRIM47, GPX1, CCND1, HIST1H3A, HIST1H4I	33	6713	19662	1.15383	1	0.935755	99.8591
GOTERM_BP_ALL	GO:0032774~RNA biosynthetic process	7	20	0.40802	CDKN1C, CCND1, HIST1H3A, COL1A1, HIST1H4I, TAF6L, PIN1	27	3565	18082	1.31499	1	0.91336	99.9801
GOTERM_BP_ALL	GO:0051172~negative regulation of nitrogen compound metabolic process	4	11.4286	0.409785	CDKN1C, CCND1, HIST1H3A, HIST1H4I	27	1605	18082	1.66904	1	0.913777	99.9811
GOTERM_BP_ALL	GO:0051252~regulation of RNA metabolic process	7	20	0.410839	CDKN1C, CCND1, HIST1H3A, COL1A1, HIST1H4I, TAF6L, PIN1	27	3575	18082	1.31131	1	0.913711	99.9816
GOTERM_MF_ALL	GO:0044877~macromolecular complex binding	4	11.4286	0.412579	NES, CCND1, HIST1H3A, CDC20	28	1498	17446	1.66374	1	0.999304	99.8421
GOTERM_CC_ALL	GO:0005829~cytosol	5	14.2857	0.416852	COPZ2, GPX1, CCND1, NFKBIB, PIN1	33	2011	19662	1.4814	1	0.927026	99.8834
GOTERM_BP_ALL	GO:0051248~negative regulation of protein metabolic process	3	8.57143	0.432599	GPX1, SPRED3, PIN1	27	1014	18082	1.98137	1	0.923983	99.99
GOTERM_BP_ALL	GO:0010562~positive regulation of phosphorus metabolic process	3	8.57143	0.452124	CCND1, CCK, PIN1	27	1053	18082	1.90799	1	0.932588	99.9944
GOTERM_BP_ALL	GO:0045937~positive regulation of phosphate metabolic process	3	8.57143	0.452124	CCND1, CCK, PIN1	27	1053	18082	1.90799	1	0.932588	99.9944
GOTERM_CC_ALL	GO:0032991~macromolecular complex	10	28.5714	0.454244	COPZ2, MYL6, CCND1, HIST1H3A, CDC20, COL1A1, TIMM23, HIST1H4I, TAF6L, H19	33	5097	19662	1.16896	1	0.935358	99.9492
GOTERM_BP_ALL	GO:0006468~protein phosphorylation	4	11.4286	0.462069	CCND1, CCK, SPRED3, PIN1	27	1737	18082	1.54221	1	0.936666	99.9958
GOTERM_BP_ALL	GO:0010467~gene expression	9	25.7143	0.489619	CDKN1C, GPX1, CCND1, HIST1H3A, COL1A1, HIST1H4I, TAF6L, H19, PIN1	27	5224	18082	1.15378	1	0.947736	99.9982
GOTERM_BP_ALL	GO:2000112~regulation of cellular macromolecule biosynthetic process	7	20	0.495073	CDKN1C, CCND1, HIST1H3A, COL1A1, HIST1H4I, TAF6L, PIN1	27	3875	18082	1.20979	1	0.949618	99.9985
GOTERM_BP_ALL	GO:0044260~cellular macromolecule metabolic process	13	37.1429	0.506121	SEPT4, CCK, CDC20, TAF6L, PIN1, H19, CDKN1C, GPX1, CCND1, HIST1H3A, SPRED3, COL1A1, HIST1H4I	27	8038	18082	1.08312	1	0.953277	99.999
GOTERM_BP_ALL	GO:0044267~cellular protein metabolic process	8	22.8571	0.507571	GPX1, SEPT4, CCND1, CCK, SPRED3, CDC20, TAF6L, PIN1	27	4608	18082	1.16268	1	0.953378	99.999
GOTERM_BP_ALL	GO:0034654~nucleobase-containing compound biosynthetic process	7	20	0.516352	CDKN1C, CCND1, HIST1H3A, COL1A1, HIST1H4I, TAF6L, PIN1	27	3952	18082	1.18622	1	0.956402	99.9993
GOTERM_BP_ALL	GO:0071495~cellular response to endogenous stimulus	3	8.57143	0.517365	CDKN1C, COL1A1, PIN1	27	1189	18082	1.68975	1	0.956327	99.9993
GOTERM_BP_ALL	GO:0010556~regulation of macromolecule biosynthetic process	7	20	0.520196	CDKN1C, CCND1, HIST1H3A, COL1A1, HIST1H4I, TAF6L, PIN1	27	3966	18082	1.18203	1	0.956493	99.9993
GOTERM_BP_ALL	GO:0018130~heterocycle biosynthetic process	7	20	0.531948	CDKN1C, CCND1, HIST1H3A, COL1A1, HIST1H4I, TAF6L, PIN1	27	4009	18082	1.16935	1	0.960431	99.9996
GOTERM_BP_ALL	GO:0019438~aromatic compound biosynthetic process	7	20	0.536299	CDKN1C, CCND1, HIST1H3A, COL1A1, HIST1H4I, TAF6L, PIN1	27	4025	18082	1.1647	1	0.96155	99.9996
GOTERM_BP_ALL	GO:0002682~regulation of immune system process	3	8.57143	0.544609	GPX1, HIST1H3A, HIST1H4I	27	1249	18082	1.60858	1	0.963986	99.9997
GOTERM_BP_ALL	GO:0090304~nucleic acid metabolic process	8	22.8571	0.558313	CDKN1C, CCND1, HIST1H3A, COL1A1, HIST1H4I, TAF6L, H19, PIN1	27	4805	18082	1.11501	1	0.967608	99.9998
GOTERM_BP_ALL	GO:1901362~organic cyclic compound biosynthetic process	7	20	0.564257	CDKN1C, CCND1, HIST1H3A, COL1A1, HIST1H4I, TAF6L, PIN1	27	4129	18082	1.13537	1	0.969042	99.9999
GOTERM_BP_ALL	GO:0031326~regulation of cellular biosynthetic process	7	20	0.567179	CDKN1C, CCND1, HIST1H3A, COL1A1, HIST1H4I, TAF6L, PIN1	27	4140	18082	1.13235	1	0.969548	99.9999
GOTERM_BP_ALL	GO:0009889~regulation of biosynthetic process	7	20	0.582198	CDKN1C, CCND1, HIST1H3A, COL1A1, HIST1H4I, TAF6L, PIN1	27	4197	18082	1.11697	1	0.973399	99.9999
GOTERM_BP_ALL	GO:0045893~positive regulation of transcription, DNA-templated	3	8.57143	0.583586	CDKN1C, COL1A1, PIN1	27	1339	18082	1.50046	1	0.973448	99.9999
GOTERM_BP_ALL	GO:1903508~positive regulation of nucleic acid-templated transcription	3	8.57143	0.583586	CDKN1C, COL1A1, PIN1	27	1339	18082	1.50046	1	0.973448	99.9999
GOTERM_BP_ALL	GO:1902680~positive regulation of RNA biosynthetic process	3	8.57143	0.585265	CDKN1C, COL1A1, PIN1	27	1343	18082	1.49599	1	0.973573	99.9999
GOTERM_BP_ALL	GO:0044237~cellular metabolic process	15	42.8571	0.592526	SEPT4, CCK, ROMO1, CDC20, VGF, TAF6L, PIN1, H19, CDKN1C, GPX1, CCND1, HIST1H3A, SPRED3, COL1A1, HIST1H4I	27	9794	18082	1.02568	1	0.974829	100
GOTERM_BP_ALL	GO:0051254~positive regulation of RNA metabolic process	3	8.57143	0.60747	CDKN1C, COL1A1, PIN1	27	1397	18082	1.43816	1	0.978134	100
GOTERM_BP_ALL	GO:0006796~phosphate-containing compound metabolic process	5	14.2857	0.609286	CDKN1C, CCND1, CCK, SPRED3, PIN1	27	2869	18082	1.16714	1	0.978275	100
GOTERM_BP_ALL	GO:0006793~phosphorus metabolic process	5	14.2857	0.610467	CDKN1C, CCND1, CCK, SPRED3, PIN1	27	2873	18082	1.16551	1	0.978273	100
GOTERM_BP_ALL	GO:0016070~RNA metabolic process	7	20	0.616645	CDKN1C, CCND1, HIST1H3A, COL1A1, HIST1H4I, TAF6L, PIN1	27	4331	18082	1.08241	1	0.979382	100
GOTERM_BP_ALL	GO:0019538~protein metabolic process	8	22.8571	0.650851	GPX1, SEPT4, CCND1, CCK, SPRED3, CDC20, TAF6L, PIN1	27	5186	18082	1.03309	1	0.985682	100
GOTERM_BP_ALL	GO:0006508~proteolysis	3	8.57143	0.667911	GPX1, CCK, CDC20	27	1556	18082	1.2912	1	0.987965	100
GOTERM_BP_ALL	GO:0002376~immune system process	4	11.4286	0.672691	CDKN1C, GPX1, HIST1H3A, HIST1H4I	27	2342	18082	1.14382	1	0.988482	100
GOTERM_BP_ALL	GO:0010557~positive regulation of macromolecule biosynthetic process	3	8.57143	0.675344	CDKN1C, COL1A1, PIN1	27	1577	18082	1.27401	1	0.98869	100
GOTERM_BP_ALL	GO:0043170~macromolecule metabolic process	13	37.1429	0.691187	SEPT4, CCK, CDC20, TAF6L, PIN1, H19, CDKN1C, GPX1, CCND1, HIST1H3A, SPRED3, COL1A1, HIST1H4I	27	8886	18082	0.97976	1	0.990174	100
GOTERM_BP_ALL	GO:0045935~positive regulation of nucleobase-containing compound metabolic process	3	8.57143	0.695883	CDKN1C, COL1A1, PIN1	27	1637	18082	1.22731	1	0.990612	100
GOTERM_BP_ALL	GO:0006139~nucleobase-containing compound metabolic process	8	22.8571	0.696065	CDKN1C, CCND1, HIST1H3A, COL1A1, HIST1H4I, TAF6L, H19, PIN1	27	5389	18082	0.994179	1	0.990497	100
GOTERM_BP_ALL	GO:0044271~cellular nitrogen compound biosynthetic process	7	20	0.708206	CDKN1C, CCND1, HIST1H3A, COL1A1, HIST1H4I, TAF6L, PIN1	27	4719	18082	0.993415	1	0.991652	100
GOTERM_BP_ALL	GO:0034641~cellular nitrogen compound metabolic process	9	25.7143	0.714899	CDKN1C, GPX1, CCND1, HIST1H3A, COL1A1, HIST1H4I, TAF6L, H19, PIN1	27	6198	18082	0.972464	1	0.992022	100
GOTERM_BP_ALL	GO:0006366~transcription from RNA polymerase II promoter	3	8.57143	0.716351	CDKN1C, CCND1, PIN1	27	1700	18082	1.18183	1	0.99206	100
GOTERM_BP_ALL	GO:0046483~heterocycle metabolic process	8	22.8571	0.718759	CDKN1C, CCND1, HIST1H3A, COL1A1, HIST1H4I, TAF6L, H19, PIN1	27	5497	18082	0.974646	1	0.992085	100
GOTERM_BP_ALL	GO:0031328~positive regulation of cellular biosynthetic process	3	8.57143	0.719184	CDKN1C, COL1A1, PIN1	27	1709	18082	1.17561	1	0.992014	100
GOTERM_BP_ALL	GO:0034645~cellular macromolecule biosynthetic process	7	20	0.727687	CDKN1C, CCND1, HIST1H3A, COL1A1, HIST1H4I, TAF6L, PIN1	27	4810	18082	0.974621	1	0.992571	100
GOTERM_BP_ALL	GO:0051173~positive regulation of nitrogen compound metabolic process	3	8.57143	0.729383	CDKN1C, COL1A1, PIN1	27	1742	18082	1.15334	1	0.992637	100
GOTERM_BP_ALL	GO:0009891~positive regulation of biosynthetic process	3	8.57143	0.729991	CDKN1C, COL1A1, PIN1	27	1744	18082	1.15201	1	0.992591	100
GOTERM_BP_ALL	GO:0006725~cellular aromatic compound metabolic process	8	22.8571	0.731536	CDKN1C, CCND1, HIST1H3A, COL1A1, HIST1H4I, TAF6L, H19, PIN1	27	5560	18082	0.963602	1	0.992533	100
GOTERM_BP_ALL	GO:0006357~regulation of transcription from RNA polymerase II promoter	3	8.57143	0.738989	CDKN1C, CCND1, PIN1	27	1774	18082	1.13253	1	0.993176	100
GOTERM_BP_ALL	GO:0009059~macromolecule biosynthetic process	7	20	0.751143	CDKN1C, CCND1, HIST1H3A, COL1A1, HIST1H4I, TAF6L, PIN1	27	4925	18082	0.951863	1	0.994195	100
GOTERM_BP_ALL	GO:1901360~organic cyclic compound metabolic process	8	22.8571	0.764446	CDKN1C, CCND1, HIST1H3A, COL1A1, HIST1H4I, TAF6L, H19, PIN1	27	5731	18082	0.934851	1	0.995189	100
GOTERM_BP_ALL	GO:0006807~nitrogen compound metabolic process	9	25.7143	0.778482	CDKN1C, GPX1, CCND1, HIST1H3A, COL1A1, HIST1H4I, TAF6L, H19, PIN1	27	6537	18082	0.922034	1	0.996102	100
GOTERM_BP_ALL	GO:0008152~metabolic process	15	42.8571	0.805828	SEPT4, CCK, ROMO1, CDC20, VGF, TAF6L, PIN1, H19, CDKN1C, GPX1, CCND1, HIST1H3A, SPRED3, COL1A1, HIST1H4I	27	10880	18082	0.923305	1	0.997557	100
GOTERM_BP_ALL	GO:0044238~primary metabolic process	13	37.1429	0.853364	SEPT4, CCK, CDC20, TAF6L, PIN1, H19, CDKN1C, GPX1, CCND1, HIST1H3A, SPRED3, COL1A1, HIST1H4I	27	9853	18082	0.883604	1	0.99911	100
GOTERM_BP_ALL	GO:0044249~cellular biosynthetic process	7	20	0.878634	CDKN1C, CCND1, HIST1H3A, COL1A1, HIST1H4I, TAF6L, PIN1	27	5732	18082	0.817852	1	0.999544	100
GOTERM_BP_ALL	GO:1901576~organic substance biosynthetic process	7	20	0.889901	CDKN1C, CCND1, HIST1H3A, COL1A1, HIST1H4I, TAF6L, PIN1	27	5830	18082	0.804104	1	0.999673	100
GOTERM_MF_ALL	GO:0016740~transferase activity	3	8.57143	0.895094	CDKN1C, CCND1, TAF6L	28	2347	17446	0.796427	1	1	100
GOTERM_BP_ALL	GO:0009058~biosynthetic process	7	20	0.899933	CDKN1C, CCND1, HIST1H3A, COL1A1, HIST1H4I, TAF6L, PIN1	27	5924	18082	0.791345	1	0.999763	100
GOTERM_BP_ALL	GO:0071704~organic substance metabolic process	13	37.1429	0.918145	SEPT4, CCK, CDC20, TAF6L, PIN1, H19, CDKN1C, GPX1, CCND1, HIST1H3A, SPRED3, COL1A1, HIST1H4I	27	10445	18082	0.833523	1	0.999883	100
GOTERM_BP_ALL	GO:0044710~single-organism metabolic process	4	11.4286	0.918566	GPX1, SPRED3, COL1A1, PIN1	27	3641	18082	0.735736	1	0.999882	100
Annotation Cluster 15	Enrichment Score: 0.6715889951443779
Category	Term	Count	%	PValue	Genes	List Total	Pop Hits	Pop Total	Fold Enrichment	Bonferroni	Benjamini	FDR
GOTERM_CC_ALL	GO:0005856~cytoskeleton	8	22.8571	0.0416852	HYPK, MYL6, TPPP3, SEPT4, NES, RIN1, CDC20, KRT10	33	2032	19662	2.34574	0.999791	0.999791	41.3302
GOTERM_CC_ALL	GO:0044446~intracellular organelle part	16	45.7143	0.197781	MYL6, HYPK, COPZ2, SEPT4, TPPP3, NES, ROMO1, KRT10, CDC20, VGF, TIMM23, TAF6L, PIN1, CCND1, HIST1H3A, HIST1H4I	33	7483	19662	1.27397	1	0.924201	93.6701
GOTERM_CC_ALL	GO:0043228~non-membrane-bounded organelle	10	28.5714	0.207625	HYPK, MYL6, TPPP3, SEPT4, NES, HIST1H3A, RIN1, CDC20, KRT10, HIST1H4I	33	4096	19662	1.45463	1	0.912616	94.577
GOTERM_CC_ALL	GO:0043232~intracellular non-membrane-bounded organelle	10	28.5714	0.207625	HYPK, MYL6, TPPP3, SEPT4, NES, HIST1H3A, RIN1, CDC20, KRT10, HIST1H4I	33	4096	19662	1.45463	1	0.912616	94.577
GOTERM_BP_ALL	GO:0007010~cytoskeleton organization	4	11.4286	0.215869	TPPP3, NES, CDC20, KRT10	27	1120	18082	2.3918	1	0.789251	98.0809
GOTERM_CC_ALL	GO:0044422~organelle part	16	45.7143	0.23001	MYL6, HYPK, COPZ2, SEPT4, TPPP3, NES, ROMO1, KRT10, CDC20, VGF, TIMM23, TAF6L, PIN1, CCND1, HIST1H3A, HIST1H4I	33	7667	19662	1.24339	1	0.915993	96.2123
GOTERM_CC_ALL	GO:0044430~cytoskeletal part	5	14.2857	0.240578	MYL6, TPPP3, NES, CDC20, KRT10	33	1544	19662	1.92946	1	0.917031	96.8143
GOTERM_CC_ALL	GO:0099512~supramolecular fiber	3	8.57143	0.31624	TPPP3, NES, KRT10	33	700	19662	2.55351	1	0.926362	99.1442
GOTERM_CC_ALL	GO:0099513~polymeric cytoskeletal fiber	3	8.57143	0.31624	TPPP3, NES, KRT10	33	700	19662	2.55351	1	0.926362	99.1442
GOTERM_BP_ALL	GO:1902589~single-organism organelle organization	4	11.4286	0.453066	TPPP3, NES, CDC20, KRT10	27	1714	18082	1.5629	1	0.932459	99.9945
Annotation Cluster 16	Enrichment Score: 0.6554085965866623
Category	Term	Count	%	PValue	Genes	List Total	Pop Hits	Pop Total	Fold Enrichment	Bonferroni	Benjamini	FDR
GOTERM_BP_ALL	GO:0050790~regulation of catalytic activity	7	20	0.0276667	GPX1, NES, CCND1, CCK, SPRED3, CDC20, PIN1	27	1662	18082	2.82065	1	0.567581	36.6257
GOTERM_BP_ALL	GO:0032268~regulation of cellular protein metabolic process	7	20	0.103193	GPX1, SEPT4, CCND1, CCK, SPRED3, CDC20, PIN1	27	2298	18082	2.04	1	0.644958	82.9771
GOTERM_BP_ALL	GO:0051246~regulation of protein metabolic process	7	20	0.136661	GPX1, SEPT4, CCND1, CCK, SPRED3, CDC20, PIN1	27	2483	18082	1.88801	1	0.691073	90.8271
GOTERM_BP_ALL	GO:0030163~protein catabolic process	3	8.57143	0.304965	GPX1, CDC20, PIN1	27	771	18082	2.60585	1	0.859069	99.7299
GOTERM_BP_ALL	GO:0009057~macromolecule catabolic process	3	8.57143	0.430578	GPX1, CDC20, PIN1	27	1010	18082	1.98922	1	0.92346	99.9894
GOTERM_BP_ALL	GO:1901575~organic substance catabolic process	3	8.57143	0.696216	GPX1, CDC20, PIN1	27	1638	18082	1.22656	1	0.990378	100
GOTERM_BP_ALL	GO:0009056~catabolic process	3	8.57143	0.724166	GPX1, CDC20, PIN1	27	1725	18082	1.1647	1	0.992428	100
Annotation Cluster 17	Enrichment Score: 0.5256572932085548
Category	Term	Count	%	PValue	Genes	List Total	Pop Hits	Pop Total	Fold Enrichment	Bonferroni	Benjamini	FDR
GOTERM_BP_ALL	GO:0031667~response to nutrient levels	4	11.4286	0.023148	CCND1, CCK, COL1A1, VGF	27	430	18082	6.2298	1	0.548141	31.6643
GOTERM_BP_ALL	GO:0009991~response to extracellular stimulus	4	11.4286	0.0278692	CCND1, CCK, COL1A1, VGF	27	462	18082	5.7983	1	0.561739	36.8399
GOTERM_BP_ALL	GO:0009605~response to external stimulus	8	22.8571	0.0394726	GPX1, CCND1, CCK, NFKBIB, HIST1H3A, ROMO1, COL1A1, VGF	27	2301	18082	2.32839	1	0.546029	48.0406
GOTERM_BP_ALL	GO:0009628~response to abiotic stimulus	4	11.4286	0.226585	GPX1, CCND1, COL1A1, VGF	27	1148	18082	2.33346	1	0.800571	98.4656
GOTERM_BP_ALL	GO:0015031~protein transport	5	14.2857	0.234775	COPZ2, NFKBIB, COL1A1, VGF, TIMM23	27	1733	18082	1.93221	1	0.807214	98.7094
GOTERM_BP_ALL	GO:0008104~protein localization	6	17.1429	0.247958	COPZ2, NFKBIB, COL1A1, VGF, TIMM23, PIN1	27	2367	18082	1.6976	1	0.816387	99.0271
GOTERM_CC_ALL	GO:0016023~cytoplasmic, membrane-bounded vesicle	4	11.4286	0.259196	COPZ2, CPNE6, COL1A1, VGF	33	1087	19662	2.19252	1	0.916896	97.6654
GOTERM_BP_ALL	GO:0051179~localization	11	31.4286	0.268951	COPZ2, GPX1, CCND1, CCK, TNFRSF12A, NFKBIB, RIN1, COL1A1, VGF, TIMM23, PIN1	27	5623	18082	1.31011	1	0.828479	99.386
GOTERM_BP_ALL	GO:0071702~organic substance transport	6	17.1429	0.279108	COPZ2, CCK, NFKBIB, COL1A1, VGF, TIMM23	27	2476	18082	1.62287	1	0.837542	99.5109
GOTERM_BP_ALL	GO:0045184~establishment of protein localization	5	14.2857	0.287275	COPZ2, NFKBIB, COL1A1, VGF, TIMM23	27	1894	18082	1.76796	1	0.844967	99.5936
GOTERM_CC_ALL	GO:0031410~cytoplasmic vesicle	4	11.4286	0.312355	COPZ2, CPNE6, COL1A1, VGF	33	1205	19662	1.97782	1	0.936713	99.0812
GOTERM_CC_ALL	GO:0097708~intracellular vesicle	4	11.4286	0.314173	COPZ2, CPNE6, COL1A1, VGF	33	1209	19662	1.97128	1	0.931459	99.1112
GOTERM_BP_ALL	GO:0033365~protein localization to organelle	3	8.57143	0.316272	NFKBIB, COL1A1, TIMM23	27	792	18082	2.53676	1	0.868717	99.7931
GOTERM_BP_ALL	GO:0033036~macromolecule localization	6	17.1429	0.347288	COPZ2, NFKBIB, COL1A1, VGF, TIMM23, PIN1	27	2705	18082	1.48548	1	0.885552	99.9027
GOTERM_BP_ALL	GO:0034613~cellular protein localization	4	11.4286	0.367418	NFKBIB, COL1A1, TIMM23, PIN1	27	1500	18082	1.78588	1	0.898706	99.9415
GOTERM_BP_ALL	GO:0070727~cellular macromolecule localization	4	11.4286	0.37228	NFKBIB, COL1A1, TIMM23, PIN1	27	1512	18082	1.7717	1	0.898005	99.9484
GOTERM_BP_ALL	GO:0006810~transport	8	22.8571	0.432973	COPZ2, CCND1, CCK, NFKBIB, RIN1, COL1A1, VGF, TIMM23	27	4325	18082	1.23876	1	0.923501	99.9901
GOTERM_BP_ALL	GO:0046903~secretion	3	8.57143	0.463477	CCND1, CCK, VGF	27	1076	18082	1.8672	1	0.936784	99.996
GOTERM_BP_ALL	GO:0051234~establishment of localization	8	22.8571	0.470541	COPZ2, CCND1, CCK, NFKBIB, RIN1, COL1A1, VGF, TIMM23	27	4467	18082	1.19938	1	0.939798	99.9968
GOTERM_CC_ALL	GO:0005615~extracellular space	4	11.4286	0.482676	CCK, KRT10, COL1A1, VGF	33	1585	19662	1.50364	1	0.938615	99.974
GOTERM_BP_ALL	GO:0051641~cellular localization	4	11.4286	0.663065	NFKBIB, COL1A1, TIMM23, PIN1	27	2310	18082	1.15966	1	0.987423	100
GOTERM_BP_ALL	GO:0044765~single-organism transport	5	14.2857	0.681608	CCND1, CCK, NFKBIB, VGF, TIMM23	27	3128	18082	1.0705	1	0.98923	100
GOTERM_BP_ALL	GO:0032879~regulation of localization	4	11.4286	0.725484	CCK, NFKBIB, COL1A1, PIN1	27	2530	18082	1.05882	1	0.992454	100
GOTERM_BP_ALL	GO:1902578~single-organism localization	5	14.2857	0.730647	CCND1, CCK, NFKBIB, VGF, TIMM23	27	3325	18082	1.00707	1	0.99255	100
GOTERM_CC_ALL	GO:0031090~organelle membrane	4	11.4286	0.747151	COPZ2, ROMO1, VGF, TIMM23	33	2326	19662	1.02462	1	0.994814	100
GOTERM_CC_ALL	GO:0012505~endomembrane system	4	11.4286	0.953164	COPZ2, CPNE6, COL1A1, VGF	33	3661	19662	0.65099	1	0.999985	100
Annotation Cluster 18	Enrichment Score: 0.4894970200549674
Category	Term	Count	%	PValue	Genes	List Total	Pop Hits	Pop Total	Fold Enrichment	Bonferroni	Benjamini	FDR
GOTERM_CC_ALL	GO:0043229~intracellular organelle	23	65.7143	0.194224	MYL6, HYPK, COPZ2, TPPP3, SEPT4, NES, NFKBIB, CPNE6, ROMO1, CDC20, KRT10, VGF, TIMM23, TAF6L, PIN1, CDKN1C, GPX1, TRIM47, CCND1, HIST1H3A, RIN1, COL1A1, HIST1H4I	33	11735	19662	1.16777	1	0.931838	93.3095
GOTERM_CC_ALL	GO:0044446~intracellular organelle part	16	45.7143	0.197781	MYL6, HYPK, COPZ2, SEPT4, TPPP3, NES, ROMO1, KRT10, CDC20, VGF, TIMM23, TAF6L, PIN1, CCND1, HIST1H3A, HIST1H4I	33	7483	19662	1.27397	1	0.924201	93.6701
GOTERM_CC_ALL	GO:0044422~organelle part	16	45.7143	0.23001	MYL6, HYPK, COPZ2, SEPT4, TPPP3, NES, ROMO1, KRT10, CDC20, VGF, TIMM23, TAF6L, PIN1, CCND1, HIST1H3A, HIST1H4I	33	7667	19662	1.24339	1	0.915993	96.2123
GOTERM_CC_ALL	GO:0005737~cytoplasm	20	57.1429	0.295833	HYPK, COPZ2, TPPP3, SEPT4, NES, NFKBIB, CPNE6, ROMO1, KRT10, CDC20, VGF, TIMM23, H19, PIN1, CDKN1C, GPX1, TRIM47, CCND1, RIN1, COL1A1	33	10431	19662	1.1424	1	0.931745	98.7631
GOTERM_CC_ALL	GO:0043226~organelle	23	65.7143	0.40175	MYL6, HYPK, COPZ2, TPPP3, SEPT4, NES, NFKBIB, CPNE6, ROMO1, CDC20, KRT10, VGF, TIMM23, TAF6L, PIN1, CDKN1C, GPX1, TRIM47, CCND1, HIST1H3A, RIN1, COL1A1, HIST1H4I	33	12768	19662	1.07329	1	0.936906	99.8394
GOTERM_CC_ALL	GO:0005622~intracellular	25	71.4286	0.411931	HYPK, MYL6, COPZ2, SEPT4, TPPP3, NES, CPNE6, NFKBIB, ROMO1, KRT10, CDC20, VGF, TAF6L, TIMM23, H19, PIN1, CDKN1C, TRIM47, GPX1, CCND1, REM2, HIST1H3A, RIN1, COL1A1, HIST1H4I	33	14047	19662	1.0604	1	0.92873	99.8705
GOTERM_CC_ALL	GO:0044424~intracellular part	24	68.5714	0.424263	MYL6, HYPK, COPZ2, TPPP3, SEPT4, NES, NFKBIB, CPNE6, ROMO1, CDC20, KRT10, VGF, TIMM23, TAF6L, H19, PIN1, CDKN1C, GPX1, TRIM47, CCND1, HIST1H3A, RIN1, COL1A1, HIST1H4I	33	13479	19662	1.06088	1	0.9269	99.9007
GOTERM_CC_ALL	GO:0043227~membrane-bounded organelle	21	60	0.453033	MYL6, HYPK, COPZ2, TPPP3, SEPT4, NFKBIB, CPNE6, ROMO1, KRT10, CDC20, VGF, TIMM23, TAF6L, PIN1, CDKN1C, GPX1, TRIM47, CCND1, HIST1H3A, COL1A1, HIST1H4I	33	11760	19662	1.06396	1	0.938721	99.9477
GOTERM_CC_ALL	GO:0043231~intracellular membrane-bounded organelle	19	54.2857	0.472825	HYPK, COPZ2, SEPT4, NFKBIB, CPNE6, ROMO1, KRT10, CDC20, VGF, TIMM23, TAF6L, PIN1, CDKN1C, GPX1, TRIM47, CCND1, HIST1H3A, COL1A1, HIST1H4I	33	10626	19662	1.06536	1	0.937317	99.9671
Annotation Cluster 19	Enrichment Score: 0.4636070072548353
Category	Term	Count	%	PValue	Genes	List Total	Pop Hits	Pop Total	Fold Enrichment	Bonferroni	Benjamini	FDR
GOTERM_CC_ALL	GO:0097458~neuron part	6	17.1429	0.118962	GPX1, CCK, CPNE6, RIN1, VGF, PIN1	33	1620	19662	2.20673	1	0.95717	79.5293
GOTERM_BP_ALL	GO:0048878~chemical homeostasis	3	8.57143	0.475676	GPX1, CCK, VGF	27	1101	18082	1.82481	1	0.941755	99.9972
GOTERM_BP_ALL	GO:0042592~homeostatic process	3	8.57143	0.718556	GPX1, CCK, VGF	27	1707	18082	1.17698	1	0.992179	100
Annotation Cluster 20	Enrichment Score: 0.3816949218148414
Category	Term	Count	%	PValue	Genes	List Total	Pop Hits	Pop Total	Fold Enrichment	Bonferroni	Benjamini	FDR
GOTERM_MF_ALL	GO:0017111~nucleoside-triphosphatase activity	3	8.57143	0.319795	MYL6, REM2, PIN1	28	742	17446	2.51916	1	0.99988	99.0654
GOTERM_MF_ALL	GO:0016462~pyrophosphatase activity	3	8.57143	0.346266	MYL6, REM2, PIN1	28	788	17446	2.3721	1	0.999836	99.4224
GOTERM_MF_ALL	GO:0016818~hydrolase activity, acting on acid anhydrides, in phosphorus-containing anhydrides	3	8.57143	0.347411	MYL6, REM2, PIN1	28	790	17446	2.36609	1	0.999088	99.4346
GOTERM_MF_ALL	GO:0016817~hydrolase activity, acting on acid anhydrides	3	8.57143	0.349128	MYL6, REM2, PIN1	28	793	17446	2.35714	1	0.998343	99.4524
GOTERM_MF_ALL	GO:0016787~hydrolase activity	3	8.57143	0.919216	MYL6, REM2, PIN1	28	2532	17446	0.738236	1	1	100
Annotation Cluster 21	Enrichment Score: 0.005366034828701626
Category	Term	Count	%	PValue	Genes	List Total	Pop Hits	Pop Total	Fold Enrichment	Bonferroni	Benjamini	FDR
GOTERM_MF_ALL	GO:0043167~ion binding	4	11.4286	0.976895	MYL6, TRIM47, COL1A1, PIN1	28	4288	17446	0.581223	1	1	100
GOTERM_MF_ALL	GO:0046872~metal ion binding	3	8.57143	0.992935	MYL6, TRIM47, COL1A1	28	4068	17446	0.459492	1	1	100
GOTERM_MF_ALL	GO:0043169~cation binding	3	8.57143	0.993421	MYL6, TRIM47, COL1A1	28	4109	17446	0.454907	1	1	100
Annotation Cluster 22	Enrichment Score: 0.0030265538281293277
Category	Term	Count	%	PValue	Genes	List Total	Pop Hits	Pop Total	Fold Enrichment	Bonferroni	Benjamini	FDR
GOTERM_CC_ALL	GO:0016021~integral component of membrane	7	20	0.990721	TMEM240, 6330403K07RIK, TNFRSF12A, TMEM261, ROMO1, TIMM23, GPR153	33	7127	19662	0.585201	1	1	100
GOTERM_CC_ALL	GO:0031224~intrinsic component of membrane	7	20	0.992451	TMEM240, 6330403K07RIK, TNFRSF12A, TMEM261, ROMO1, TIMM23, GPR153	33	7260	19662	0.57448	1	1	100
GOTERM_CC_ALL	GO:0044425~membrane part	8	22.8571	0.996001	COPZ2, TMEM240, 6330403K07RIK, TNFRSF12A, TMEM261, ROMO1, TIMM23, GPR153	33	8380	19662	0.5688	1	1	100
Annotation Cluster 23	Enrichment Score: 0.002423809635353319
Category	Term	Count	%	PValue	Genes	List Total	Pop Hits	Pop Total	Fold Enrichment	Bonferroni	Benjamini	FDR
GOTERM_MF_ALL	GO:0003676~nucleic acid binding	3	8.57143	0.993317	FLYWCH2, HIST1H3A, HIST1H4I	28	4100	17446	0.455906	1	1	100
GOTERM_MF_ALL	GO:1901363~heterocyclic compound binding	5	14.2857	0.994627	FLYWCH2, SEPT4, HIST1H3A, REM2, HIST1H4I	28	6072	17446	0.513069	1	1	100
GOTERM_MF_ALL	GO:0097159~organic cyclic compound binding	5	14.2857	0.995361	FLYWCH2, SEPT4, HIST1H3A, REM2, HIST1H4I	28	6159	17446	0.505822	1	1	100

## Sheet: R1115H down genes
DAVID GO term analysis of R1115H down-regulated DE genes
Vallianatos et al., 2018
Annotation Cluster 1	Enrichment Score: 1.2997902432689488
Category	Term	Count	%	PValue	Genes	List Total	Pop Hits	Pop Total	Fold Enrichment	Bonferroni	Benjamini	FDR
GOTERM_CC_ALL	GO:0043229~intracellular organelle	34	73.913	0.00786744	MYL6, UTP3, HYPK, TPPP3, IER3IP1, COPRS, SHFM1, HIST1H2AE, BEX1, ROMO1, RHOQ, RPLP2, VGF, NAP1L5, NDUFAF2, PIN1, OAZ2, TAF5L, RASL10A, PLEKHO1, LSM4, TMEM223, NES, RPP21, BAIAP2L2, NDUFA8, PNCK, S100A10, MAFK, CERCAM, ZFP579, DOC2A, HIST1H3A, RHBDL1	43	11735	19662	1.32481	0.824072	0.824072	9.56545
GOTERM_CC_ALL	GO:0043227~membrane-bounded organelle	33	71.7391	0.0198146	MYL6, UTP3, HYPK, TPPP3, IER3IP1, COPRS, SHFM1, HIST1H2AE, BEX1, ROMO1, RHOQ, RPLP2, VGF, NAP1L5, NDUFAF2, PIN1, OAZ2, TAF5L, RASL10A, PLEKHO1, LSM4, TMEM223, RPP21, BAIAP2L2, NDUFA8, PNCK, S100A10, MAFK, CERCAM, ZFP579, DOC2A, HIST1H3A, RHBDL1	43	11760	19662	1.28312	0.987759	0.889362	22.4898
GOTERM_CC_ALL	GO:0044446~intracellular organelle part	24	52.1739	0.0203779	MYL6, UTP3, HYPK, TPPP3, NES, IER3IP1, RPP21, BAIAP2L2, NDUFA8, HIST1H2AE, SHFM1, ROMO1, RHOQ, RPLP2, VGF, MAFK, CERCAM, PIN1, TAF5L, DOC2A, RASL10A, HIST1H3A, LSM4, RHBDL1	43	7483	19662	1.46654	0.989213	0.779049	23.0548
GOTERM_CC_ALL	GO:0044422~organelle part	24	52.1739	0.0275257	MYL6, UTP3, HYPK, TPPP3, NES, IER3IP1, RPP21, BAIAP2L2, NDUFA8, HIST1H2AE, SHFM1, ROMO1, RHOQ, RPLP2, VGF, MAFK, CERCAM, PIN1, TAF5L, DOC2A, RASL10A, HIST1H3A, LSM4, RHBDL1	43	7667	19662	1.43135	0.997846	0.784574	29.9035
GOTERM_CC_ALL	GO:0043226~organelle	34	73.913	0.0416055	MYL6, UTP3, HYPK, TPPP3, IER3IP1, COPRS, SHFM1, HIST1H2AE, BEX1, ROMO1, RHOQ, RPLP2, VGF, NAP1L5, NDUFAF2, PIN1, OAZ2, TAF5L, RASL10A, PLEKHO1, LSM4, TMEM223, NES, RPP21, BAIAP2L2, NDUFA8, PNCK, S100A10, MAFK, CERCAM, ZFP579, DOC2A, HIST1H3A, RHBDL1	43	12768	19662	1.21763	0.999913	0.845848	41.7803
GOTERM_CC_ALL	GO:0044424~intracellular part	35	76.087	0.0542103	MYL6, UTP3, HYPK, TPPP3, IER3IP1, COPRS, SHFM1, HIST1H2AE, BEX1, ROMO1, RHOQ, RPLP2, VGF, NAP1L5, NDUFAF2, H19, PIN1, OAZ2, TAF5L, RASL10A, PLEKHO1, LSM4, TMEM223, NES, RPP21, BAIAP2L2, NDUFA8, PNCK, S100A10, MAFK, CERCAM, ZFP579, DOC2A, HIST1H3A, RHBDL1	43	13479	19662	1.18732	0.999995	0.870441	50.8097
GOTERM_CC_ALL	GO:0005622~intracellular	36	78.2609	0.0569895	MYL6, UTP3, HYPK, TPPP3, IER3IP1, COPRS, SHFM1, HIST1H2AE, BEX1, ROMO1, RHOQ, RPLP2, VGF, NAP1L5, NDUFAF2, H19, PIN1, OAZ2, TAF5L, RASL10A, PLEKHO1, LSM4, TMEM223, NES, RPP21, BAIAP2L2, NDUFA8, PNCK, S100A10, MAFK, CERCAM, ZFP579, DOC2A, REM2, HIST1H3A, RHBDL1	43	14047	19662	1.17187	0.999998	0.841842	52.6183
GOTERM_CC_ALL	GO:0043231~intracellular membrane-bounded organelle	29	63.0435	0.0671693	UTP3, HYPK, IER3IP1, SHFM1, COPRS, HIST1H2AE, BEX1, ROMO1, VGF, NAP1L5, NDUFAF2, PIN1, OAZ2, TAF5L, RASL10A, PLEKHO1, LSM4, TMEM223, RPP21, BAIAP2L2, NDUFA8, PNCK, S100A10, MAFK, CERCAM, ZFP579, DOC2A, HIST1H3A, RHBDL1	43	10626	19662	1.24792	1	0.852233	58.7325
GOTERM_CC_ALL	GO:0044464~cell part	39	84.7826	0.357912	HYPK, MYL6, UTP3, TPPP3, IER3IP1, TNFRSF12A, COPRS, SHFM1, HIST1H2AE, BEX1, ROMO1, RHOQ, RPLP2, VGF, NAP1L5, NDUFAF2, H19, PIN1, OAZ2, TAF5L, RASL10A, PLEKHO1, LSM4, TMEM223, NES, RPP21, BAIAP2L2, NDUFA8, PNCK, CAR11, S100A10, MAFK, CERCAM, ZFP579, DOC2A, REM2, HIST1H3A, RHBDL1, SST	43	17135	19662	1.04073	1	0.972945	99.6445
GOTERM_CC_ALL	GO:0005623~cell	39	84.7826	0.371884	HYPK, MYL6, UTP3, TPPP3, IER3IP1, TNFRSF12A, COPRS, SHFM1, HIST1H2AE, BEX1, ROMO1, RHOQ, RPLP2, VGF, NAP1L5, NDUFAF2, H19, PIN1, OAZ2, TAF5L, RASL10A, PLEKHO1, LSM4, TMEM223, NES, RPP21, BAIAP2L2, NDUFA8, PNCK, CAR11, S100A10, MAFK, CERCAM, ZFP579, DOC2A, REM2, HIST1H3A, RHBDL1, SST	43	17173	19662	1.03843	1	0.970631	99.7314
Annotation Cluster 2	Enrichment Score: 1.0444490325439253
Category	Term	Count	%	PValue	Genes	List Total	Pop Hits	Pop Total	Fold Enrichment	Bonferroni	Benjamini	FDR
GOTERM_BP_ALL	GO:0043933~macromolecular complex subunit organization	13	28.2609	0.00189635	UTP3, TPPP3, NES, BAIAP2L2, COL3A1, SHFM1, HIST1H2AE, COPRS, S100A10, NAP1L5, TAF5L, HIST1H3A, LSM4	40	2229	18082	2.63645	0.870775	0.870775	2.98234
GOTERM_BP_ALL	GO:0071822~protein complex subunit organization	8	17.3913	0.0297233	TPPP3, NES, BAIAP2L2, COL3A1, HIST1H3A, SHFM1, S100A10, NAP1L5	40	1414	18082	2.55757	1	0.99998	38.2023
GOTERM_BP_ALL	GO:0034622~cellular macromolecular complex assembly	6	13.0435	0.0406685	TPPP3, BAIAP2L2, HIST1H3A, SHFM1, LSM4, NAP1L5	40	887	18082	3.05784	1	0.99987	48.4316
GOTERM_BP_ALL	GO:0006996~organelle organization	13	28.2609	0.0744707	UTP3, TPPP3, NES, BAIAP2L2, HIST1H2AE, COPRS, RHOQ, S100A10, NAP1L5, TAF5L, DOC2A, HIST1H3A, LSM4	40	3620	18082	1.62338	1	0.999906	70.9001
GOTERM_BP_ALL	GO:0016043~cellular component organization	18	39.1304	0.0965114	UTP3, TPPP3, NES, BAIAP2L2, TNFRSF12A, COL3A1, COPRS, SHFM1, HIST1H2AE, S100A10, RHOQ, NAP1L5, PIN1, TAF5L, DOC2A, HIST1H3A, PLEKHO1, LSM4	40	5872	18082	1.38571	1	0.999596	80.1881
GOTERM_BP_ALL	GO:0065003~macromolecular complex assembly	7	15.2174	0.111267	TPPP3, BAIAP2L2, HIST1H3A, SHFM1, LSM4, S100A10, NAP1L5	40	1544	18082	2.04945	1	0.999792	84.7646
GOTERM_BP_ALL	GO:0071840~cellular component organization or biogenesis	18	39.1304	0.119602	UTP3, TPPP3, NES, BAIAP2L2, TNFRSF12A, COL3A1, COPRS, SHFM1, HIST1H2AE, S100A10, RHOQ, NAP1L5, PIN1, TAF5L, DOC2A, HIST1H3A, PLEKHO1, LSM4	40	6037	18082	1.34784	1	0.99969	86.8907
GOTERM_BP_ALL	GO:0006461~protein complex assembly	6	13.0435	0.137923	TPPP3, BAIAP2L2, HIST1H3A, SHFM1, S100A10, NAP1L5	40	1277	18082	2.12396	1	0.999047	90.6265
GOTERM_BP_ALL	GO:0070271~protein complex biogenesis	6	13.0435	0.138251	TPPP3, BAIAP2L2, HIST1H3A, SHFM1, S100A10, NAP1L5	40	1278	18082	2.1223	1	0.998365	90.6833
GOTERM_BP_ALL	GO:1902589~single-organism organelle organization	7	15.2174	0.159671	TPPP3, NES, DOC2A, BAIAP2L2, LSM4, S100A10, RHOQ	40	1714	18082	1.84618	1	0.998072	93.7642
GOTERM_BP_ALL	GO:0044085~cellular component biogenesis	9	19.5652	0.204836	UTP3, TPPP3, BAIAP2L2, HIST1H3A, SHFM1, LSM4, S100A10, RHOQ, NAP1L5	40	2654	18082	1.53295	1	0.997924	97.4166
GOTERM_BP_ALL	GO:0007010~cytoskeleton organization	5	10.8696	0.220339	TPPP3, NES, BAIAP2L2, S100A10, RHOQ	40	1120	18082	2.01808	1	0.997426	98.1129
GOTERM_BP_ALL	GO:0022607~cellular component assembly	8	17.3913	0.260614	TPPP3, BAIAP2L2, HIST1H3A, SHFM1, LSM4, S100A10, RHOQ, NAP1L5	40	2418	18082	1.49562	1	0.997009	99.1902
GOTERM_BP_ALL	GO:0043623~cellular protein complex assembly	3	6.52174	0.303908	TPPP3, BAIAP2L2, SHFM1	40	513	18082	2.64357	1	0.997058	99.6907
Annotation Cluster 3	Enrichment Score: 0.6954411170188441
Category	Term	Count	%	PValue	Genes	List Total	Pop Hits	Pop Total	Fold Enrichment	Bonferroni	Benjamini	FDR
GOTERM_BP_ALL	GO:0071822~protein complex subunit organization	8	17.3913	0.0297233	TPPP3, NES, BAIAP2L2, COL3A1, HIST1H3A, SHFM1, S100A10, NAP1L5	40	1414	18082	2.55757	1	0.99998	38.2023
GOTERM_BP_ALL	GO:0051495~positive regulation of cytoskeleton organization	3	6.52174	0.0666968	NES, BAIAP2L2, S100A10	40	196	18082	6.91913	1	0.999909	66.7467
GOTERM_BP_ALL	GO:1902589~single-organism organelle organization	7	15.2174	0.159671	TPPP3, NES, DOC2A, BAIAP2L2, LSM4, S100A10, RHOQ	40	1714	18082	1.84618	1	0.998072	93.7642
GOTERM_BP_ALL	GO:0007010~cytoskeleton organization	5	10.8696	0.220339	TPPP3, NES, BAIAP2L2, S100A10, RHOQ	40	1120	18082	2.01808	1	0.997426	98.1129
GOTERM_BP_ALL	GO:0051493~regulation of cytoskeleton organization	3	6.52174	0.246814	NES, BAIAP2L2, S100A10	40	442	18082	3.06821	1	0.997782	98.9124
GOTERM_BP_ALL	GO:0051130~positive regulation of cellular component organization	5	10.8696	0.28387	NES, BAIAP2L2, TNFRSF12A, S100A10, RHOQ	40	1253	18082	1.80387	1	0.997519	99.5136
GOTERM_BP_ALL	GO:0010638~positive regulation of organelle organization	3	6.52174	0.376837	NES, BAIAP2L2, S100A10	40	605	18082	2.24157	1	0.998153	99.9471
GOTERM_BP_ALL	GO:0051128~regulation of cellular component organization	7	15.2174	0.416557	NES, BAIAP2L2, TNFRSF12A, PLEKHO1, S100A10, RHOQ, PIN1	40	2399	18082	1.31903	1	0.998834	99.9815
GOTERM_BP_ALL	GO:0033043~regulation of organelle organization	3	6.52174	0.718111	NES, BAIAP2L2, S100A10	40	1148	18082	1.18132	1	0.999781	100
Annotation Cluster 4	Enrichment Score: 0.6418390932100676
Category	Term	Count	%	PValue	Genes	List Total	Pop Hits	Pop Total	Fold Enrichment	Bonferroni	Benjamini	FDR
GOTERM_BP_ALL	GO:0061061~muscle structure development	5	10.8696	0.0492697	MYL6, COL3A1, COPRS, PLEKHO1, PIN1	40	645	18082	3.50426	1	0.999886	55.3322
GOTERM_BP_ALL	GO:0007517~muscle organ development	4	8.69565	0.0507519	MYL6, COL3A1, COPRS, PIN1	40	388	18082	4.66031	1	0.999672	56.4302
GOTERM_BP_ALL	GO:0060537~muscle tissue development	3	6.52174	0.243605	MYL6, COL3A1, PIN1	40	438	18082	3.09623	1	0.99785	98.8361
GOTERM_BP_ALL	GO:0006928~movement of cell or subcellular component	6	13.0435	0.31328	MYL6, TNFRSF12A, COL3A1, PLEKHO1, SST, PIN1	40	1724	18082	1.57326	1	0.996112	99.7508
GOTERM_BP_ALL	GO:0048513~animal organ development	7	15.2174	0.798181	UTP3, MYL6, NES, COL3A1, COPRS, VGF, PIN1	40	3520	18082	0.898963	1	0.999869	100
GOTERM_BP_ALL	GO:0009888~tissue development	3	6.52174	0.925154	MYL6, COL3A1, PIN1	40	1889	18082	0.71792	1	0.999991	100
Annotation Cluster 5	Enrichment Score: 0.5991062779134334
Category	Term	Count	%	PValue	Genes	List Total	Pop Hits	Pop Total	Fold Enrichment	Bonferroni	Benjamini	FDR
GOTERM_BP_ALL	GO:0007009~plasma membrane organization	3	6.52174	0.121298	BAIAP2L2, S100A10, RHOQ	40	279	18082	4.86075	1	0.999567	87.2877
GOTERM_BP_ALL	GO:1902589~single-organism organelle organization	7	15.2174	0.159671	TPPP3, NES, DOC2A, BAIAP2L2, LSM4, S100A10, RHOQ	40	1714	18082	1.84618	1	0.998072	93.7642
GOTERM_BP_ALL	GO:0030029~actin filament-based process	4	8.69565	0.167257	MYL6, BAIAP2L2, S100A10, RHOQ	40	656	18082	2.7564	1	0.998279	94.6039
GOTERM_BP_ALL	GO:0044802~single-organism membrane organization	4	8.69565	0.204261	DOC2A, BAIAP2L2, S100A10, RHOQ	40	724	18082	2.49751	1	0.998192	97.3866
GOTERM_BP_ALL	GO:0007010~cytoskeleton organization	5	10.8696	0.220339	TPPP3, NES, BAIAP2L2, S100A10, RHOQ	40	1120	18082	2.01808	1	0.997426	98.1129
GOTERM_BP_ALL	GO:0044089~positive regulation of cellular component biogenesis	3	6.52174	0.247617	BAIAP2L2, S100A10, RHOQ	40	443	18082	3.06129	1	0.997555	98.9307
GOTERM_BP_ALL	GO:0022607~cellular component assembly	8	17.3913	0.260614	TPPP3, BAIAP2L2, HIST1H3A, SHFM1, LSM4, S100A10, RHOQ, NAP1L5	40	2418	18082	1.49562	1	0.997009	99.1902
GOTERM_BP_ALL	GO:0061024~membrane organization	4	8.69565	0.283632	DOC2A, BAIAP2L2, S100A10, RHOQ	40	861	18082	2.10012	1	0.997745	99.511
GOTERM_BP_ALL	GO:0051130~positive regulation of cellular component organization	5	10.8696	0.28387	NES, BAIAP2L2, TNFRSF12A, S100A10, RHOQ	40	1253	18082	1.80387	1	0.997519	99.5136
GOTERM_BP_ALL	GO:0010256~endomembrane system organization	3	6.52174	0.295074	BAIAP2L2, S100A10, RHOQ	40	502	18082	2.70149	1	0.997479	99.6218
GOTERM_BP_ALL	GO:0030036~actin cytoskeleton organization	3	6.52174	0.339848	BAIAP2L2, S100A10, RHOQ	40	558	18082	2.43038	1	0.997015	99.8672
GOTERM_BP_ALL	GO:0051128~regulation of cellular component organization	7	15.2174	0.416557	NES, BAIAP2L2, TNFRSF12A, PLEKHO1, S100A10, RHOQ, PIN1	40	2399	18082	1.31903	1	0.998834	99.9815
GOTERM_BP_ALL	GO:0044087~regulation of cellular component biogenesis	3	6.52174	0.51444	BAIAP2L2, S100A10, RHOQ	40	792	18082	1.71231	1	0.999399	99.999
Annotation Cluster 6	Enrichment Score: 0.5750361982036811
Category	Term	Count	%	PValue	Genes	List Total	Pop Hits	Pop Total	Fold Enrichment	Bonferroni	Benjamini	FDR
GOTERM_BP_ALL	GO:0030029~actin filament-based process	4	8.69565	0.167257	MYL6, BAIAP2L2, S100A10, RHOQ	40	656	18082	2.7564	1	0.998279	94.6039
GOTERM_CC_ALL	GO:0015629~actin cytoskeleton	3	6.52174	0.255346	MYL6, BAIAP2L2, RHOQ	43	457	19662	3.00168	1	0.932973	97.6554
GOTERM_CC_ALL	GO:0005856~cytoskeleton	6	13.0435	0.440939	HYPK, MYL6, TPPP3, NES, BAIAP2L2, RHOQ	43	2032	19662	1.35016	1	0.971378	99.939
Annotation Cluster 7	Enrichment Score: 0.5460972873816249
Category	Term	Count	%	PValue	Genes	List Total	Pop Hits	Pop Total	Fold Enrichment	Bonferroni	Benjamini	FDR
GOTERM_CC_ALL	GO:0030529~intracellular ribonucleoprotein complex	5	10.8696	0.137304	UTP3, RPP21, LSM4, RPLP2, H19	43	934	19662	2.44784	1	0.917867	84.7415
GOTERM_CC_ALL	GO:1990904~ribonucleoprotein complex	5	10.8696	0.137688	UTP3, RPP21, LSM4, RPLP2, H19	43	935	19662	2.44522	1	0.902498	84.8279
GOTERM_BP_ALL	GO:0006396~RNA processing	3	6.52174	0.495727	UTP3, RPP21, LSM4	40	765	18082	1.77275	1	0.999421	99.9982
GOTERM_MF_ALL	GO:0003723~RNA binding	4	8.69565	0.697894	UTP3, ZFP579, LSM4, RPLP2	37	1707	17446	1.10489	1	0.999996	100
Annotation Cluster 8	Enrichment Score: 0.5445489271270086
Category	Term	Count	%	PValue	Genes	List Total	Pop Hits	Pop Total	Fold Enrichment	Bonferroni	Benjamini	FDR
GOTERM_BP_ALL	GO:0007167~enzyme linked receptor protein signaling pathway	6	13.0435	0.0310124	BAIAP2L2, COL3A1, BEX1, RHOQ, FRS3, PIN1	40	824	18082	3.29163	1	0.999795	39.4989
GOTERM_BP_ALL	GO:0032868~response to insulin	3	6.52174	0.0898173	BAIAP2L2, RHOQ, VGF	40	233	18082	5.82039	1	0.999901	77.7124
GOTERM_BP_ALL	GO:0007169~transmembrane receptor protein tyrosine kinase signaling pathway	4	8.69565	0.0937584	BAIAP2L2, BEX1, RHOQ, FRS3	40	503	18082	3.59483	1	0.999715	79.203
GOTERM_BP_ALL	GO:0010243~response to organonitrogen compound	5	10.8696	0.119235	BAIAP2L2, COL3A1, RHOQ, VGF, SST	40	878	18082	2.57432	1	0.999807	86.8032
GOTERM_BP_ALL	GO:0009719~response to endogenous stimulus	7	15.2174	0.128455	BAIAP2L2, COL3A1, RHOQ, FRS3, VGF, SST, PIN1	40	1608	18082	1.96788	1	0.999591	88.8424
GOTERM_BP_ALL	GO:1901700~response to oxygen-containing compound	7	15.2174	0.146312	BAIAP2L2, COL3A1, ROMO1, RHOQ, VGF, SST, NDUFAF2	40	1670	18082	1.89482	1	0.998582	91.9803
GOTERM_BP_ALL	GO:1901698~response to nitrogen compound	5	10.8696	0.168959	BAIAP2L2, COL3A1, RHOQ, VGF, SST	40	1004	18082	2.25125	1	0.99804	94.7772
GOTERM_BP_ALL	GO:0070887~cellular response to chemical stimulus	9	19.5652	0.191341	BAIAP2L2, COL3A1, BEX1, ROMO1, S100A10, RHOQ, FRS3, NDUFAF2, PIN1	40	2607	18082	1.56059	1	0.99827	96.6211
GOTERM_BP_ALL	GO:1901701~cellular response to oxygen-containing compound	5	10.8696	0.194518	BAIAP2L2, COL3A1, ROMO1, RHOQ, NDUFAF2	40	1063	18082	2.12629	1	0.998168	96.8268
GOTERM_BP_ALL	GO:0043434~response to peptide hormone	3	6.52174	0.195908	BAIAP2L2, RHOQ, VGF	40	378	18082	3.5877	1	0.997941	96.913
GOTERM_BP_ALL	GO:0007166~cell surface receptor signaling pathway	8	17.3913	0.213987	BAIAP2L2, TNFRSF12A, COL3A1, BEX1, RHOQ, FRS3, SST, PIN1	40	2278	18082	1.58753	1	0.997258	97.8522
GOTERM_MF_ALL	GO:0005102~receptor binding	6	13.0435	0.21654	NES, COL3A1, FRS3, VGF, CORT, SST	37	1562	17446	1.81119	1	0.986364	94.9944
GOTERM_BP_ALL	GO:1901652~response to peptide	3	6.52174	0.227597	BAIAP2L2, RHOQ, VGF	40	418	18082	3.24438	1	0.996972	98.3744
GOTERM_BP_ALL	GO:0071495~cellular response to endogenous stimulus	5	10.8696	0.252816	BAIAP2L2, COL3A1, RHOQ, FRS3, PIN1	40	1189	18082	1.90097	1	0.997623	99.0427
GOTERM_BP_ALL	GO:0042221~response to chemical	12	26.087	0.255233	BAIAP2L2, RPP21, COL3A1, BEX1, ROMO1, S100A10, RHOQ, FRS3, VGF, SST, NDUFAF2, PIN1	40	4096	18082	1.32437	1	0.997506	99.0909
GOTERM_BP_ALL	GO:0009725~response to hormone	4	8.69565	0.260578	BAIAP2L2, RHOQ, VGF, SST	40	822	18082	2.19976	1	0.997307	99.1896
GOTERM_BP_ALL	GO:0071310~cellular response to organic substance	7	15.2174	0.297774	BAIAP2L2, COL3A1, BEX1, RHOQ, FRS3, NDUFAF2, PIN1	40	2103	18082	1.50468	1	0.997405	99.6442
GOTERM_BP_ALL	GO:0010033~response to organic substance	9	19.5652	0.305561	BAIAP2L2, COL3A1, BEX1, RHOQ, FRS3, VGF, SST, NDUFAF2, PIN1	40	2972	18082	1.36893	1	0.996359	99.7022
GOTERM_BP_ALL	GO:0071417~cellular response to organonitrogen compound	3	6.52174	0.312727	BAIAP2L2, COL3A1, RHOQ	40	524	18082	2.58807	1	0.996357	99.7476
GOTERM_BP_ALL	GO:1901699~cellular response to nitrogen compound	3	6.52174	0.378395	BAIAP2L2, COL3A1, RHOQ	40	607	18082	2.23418	1	0.99807	99.9491
GOTERM_BP_ALL	GO:0044700~single organism signaling	14	30.4348	0.591571	BAIAP2L2, TNFRSF12A, COL3A1, BEX1, RHOQ, VGF, NDUFAF2, PIN1, DOC2A, RASL10A, REM2, FRS3, CORT, SST	40	6137	18082	1.03124	1	0.999529	99.9999
GOTERM_BP_ALL	GO:0050896~response to stimulus	20	43.4783	0.599126	RPP21, BAIAP2L2, TNFRSF12A, COL3A1, SHFM1, BEX1, ROMO1, S100A10, RHOQ, VGF, MAFK, NDUFAF2, PIN1, RASL10A, HIST1H3A, REM2, LSM4, FRS3, CORT, SST	40	8942	18082	1.01107	1	0.999519	100
GOTERM_BP_ALL	GO:0023052~signaling	14	30.4348	0.6012	BAIAP2L2, TNFRSF12A, COL3A1, BEX1, RHOQ, VGF, NDUFAF2, PIN1, DOC2A, RASL10A, REM2, FRS3, CORT, SST	40	6171	18082	1.02556	1	0.999511	100
GOTERM_BP_ALL	GO:0007154~cell communication	14	30.4348	0.617998	BAIAP2L2, TNFRSF12A, COL3A1, BEX1, RHOQ, VGF, NDUFAF2, PIN1, DOC2A, RASL10A, REM2, FRS3, CORT, SST	40	6231	18082	1.01568	1	0.999566	100
GOTERM_BP_ALL	GO:0051716~cellular response to stimulus	16	34.7826	0.642034	BAIAP2L2, TNFRSF12A, COL3A1, SHFM1, BEX1, ROMO1, RHOQ, S100A10, NDUFAF2, PIN1, RASL10A, REM2, LSM4, FRS3, CORT, SST	40	7253	18082	0.997215	1	0.999492	100
GOTERM_BP_ALL	GO:0009628~response to abiotic stimulus	3	6.52174	0.718111	COL3A1, VGF, SST	40	1148	18082	1.18132	1	0.999781	100
GOTERM_BP_ALL	GO:0007165~signal transduction	11	23.913	0.843445	BAIAP2L2, TNFRSF12A, RASL10A, COL3A1, REM2, BEX1, RHOQ, FRS3, CORT, SST, PIN1	40	5763	18082	0.862841	1	0.99993	100
GOTERM_BP_ALL	GO:0048522~positive regulation of cellular process	9	19.5652	0.852016	NES, BAIAP2L2, TNFRSF12A, COL3A1, BEX1, ROMO1, S100A10, RHOQ, PIN1	40	4808	18082	0.846183	1	0.999942	100
GOTERM_CC_ALL	GO:0005615~extracellular space	3	6.52174	0.863059	COL3A1, VGF, SST	43	1585	19662	0.865468	1	0.999035	100
GOTERM_BP_ALL	GO:0044763~single-organism cellular process	25	54.3478	0.888999	MYL6, TPPP3, NES, IER3IP1, BAIAP2L2, TNFRSF12A, HIST1H2AE, COL3A1, BEX1, ROMO1, RHOQ, S100A10, VGF, NDUFAF2, PIN1, OAZ2, DOC2A, RASL10A, REM2, HIST1H3A, PLEKHO1, LSM4, FRS3, CORT, SST	40	12536	18082	0.901504	1	0.999977	100
Annotation Cluster 9	Enrichment Score: 0.5149431134606459
Category	Term	Count	%	PValue	Genes	List Total	Pop Hits	Pop Total	Fold Enrichment	Bonferroni	Benjamini	FDR
GOTERM_CC_ALL	GO:0043232~intracellular non-membrane-bounded organelle	13	28.2609	0.147957	MYL6, UTP3, HYPK, TPPP3, NES, BAIAP2L2, RPP21, HIST1H2AE, RPLP2, RHOQ, RASL10A, HIST1H3A, LSM4	43	4096	19662	1.45125	1	0.904479	86.9739
GOTERM_CC_ALL	GO:0043228~non-membrane-bounded organelle	13	28.2609	0.147957	MYL6, UTP3, HYPK, TPPP3, NES, BAIAP2L2, RPP21, HIST1H2AE, RPLP2, RHOQ, RASL10A, HIST1H3A, LSM4	43	4096	19662	1.45125	1	0.904479	86.9739
GOTERM_CC_ALL	GO:0031988~membrane-bounded vesicle	11	23.913	0.191342	MYL6, TPPP3, IER3IP1, DOC2A, BAIAP2L2, HIST1H3A, HIST1H2AE, RPLP2, S100A10, RHOQ, VGF	43	3455	19662	1.45581	1	0.946078	93.3027
GOTERM_CC_ALL	GO:0031982~vesicle	11	23.913	0.235151	MYL6, TPPP3, IER3IP1, DOC2A, BAIAP2L2, HIST1H3A, HIST1H2AE, RPLP2, S100A10, RHOQ, VGF	43	3624	19662	1.38792	1	0.9397	96.704
GOTERM_CC_ALL	GO:0005576~extracellular region	12	26.087	0.359002	MYL6, TPPP3, CAR11, COL3A1, HIST1H3A, HIST1H2AE, RPLP2, S100A10, RHOQ, VGF, CORT, SST	43	4493	19662	1.22125	1	0.96963	99.6521
GOTERM_CC_ALL	GO:0044421~extracellular region part	10	21.7391	0.464997	MYL6, TPPP3, COL3A1, HIST1H3A, HIST1H2AE, RPLP2, S100A10, RHOQ, VGF, SST	43	3920	19662	1.16647	1	0.970647	99.9652
GOTERM_CC_ALL	GO:0070062~extracellular exosome	7	15.2174	0.515867	MYL6, TPPP3, HIST1H3A, HIST1H2AE, RPLP2, S100A10, RHOQ	43	2674	19662	1.197	1	0.968861	99.9902
GOTERM_CC_ALL	GO:1903561~extracellular vesicle	7	15.2174	0.521651	MYL6, TPPP3, HIST1H3A, HIST1H2AE, RPLP2, S100A10, RHOQ	43	2689	19662	1.19033	1	0.968309	99.9916
GOTERM_CC_ALL	GO:0043230~extracellular organelle	7	15.2174	0.524342	MYL6, TPPP3, HIST1H3A, HIST1H2AE, RPLP2, S100A10, RHOQ	43	2696	19662	1.18724	1	0.964427	99.9922
Annotation Cluster 10	Enrichment Score: 0.49835034503495546
Category	Term	Count	%	PValue	Genes	List Total	Pop Hits	Pop Total	Fold Enrichment	Bonferroni	Benjamini	FDR
GOTERM_MF_ALL	GO:0017111~nucleoside-triphosphatase activity	4	8.69565	0.196207	MYL6, REM2, RHOQ, PIN1	37	742	17446	2.54185	1	0.995879	93.1451
GOTERM_MF_ALL	GO:0016462~pyrophosphatase activity	4	8.69565	0.220949	MYL6, REM2, RHOQ, PIN1	37	788	17446	2.39347	1	0.98159	95.3293
GOTERM_MF_ALL	GO:0016818~hydrolase activity, acting on acid anhydrides, in phosphorus-containing anhydrides	4	8.69565	0.222041	MYL6, REM2, RHOQ, PIN1	37	790	17446	2.38741	1	0.97484	95.409
GOTERM_MF_ALL	GO:0016817~hydrolase activity, acting on acid anhydrides	4	8.69565	0.22368	MYL6, REM2, RHOQ, PIN1	37	793	17446	2.37838	1	0.967542	95.5263
GOTERM_MF_ALL	GO:0016787~hydrolase activity	6	13.0435	0.614418	MYL6, RPP21, REM2, RHBDL1, RHOQ, PIN1	37	2532	17446	1.11733	1	0.999972	99.9992
GOTERM_BP_ALL	GO:0035556~intracellular signal transduction	5	10.8696	0.773334	RASL10A, COL3A1, REM2, RHOQ, PIN1	40	2380	18082	0.949685	1	0.999848	100
Annotation Cluster 11	Enrichment Score: 0.45021998270221963
Category	Term	Count	%	PValue	Genes	List Total	Pop Hits	Pop Total	Fold Enrichment	Bonferroni	Benjamini	FDR
GOTERM_BP_ALL	GO:1902589~single-organism organelle organization	7	15.2174	0.159671	TPPP3, NES, DOC2A, BAIAP2L2, LSM4, S100A10, RHOQ	40	1714	18082	1.84618	1	0.998072	93.7642
GOTERM_BP_ALL	GO:0007010~cytoskeleton organization	5	10.8696	0.220339	TPPP3, NES, BAIAP2L2, S100A10, RHOQ	40	1120	18082	2.01808	1	0.997426	98.1129
GOTERM_CC_ALL	GO:0005856~cytoskeleton	6	13.0435	0.440939	HYPK, MYL6, TPPP3, NES, BAIAP2L2, RHOQ	43	2032	19662	1.35016	1	0.971378	99.939
GOTERM_CC_ALL	GO:0099512~supramolecular fiber	3	6.52174	0.443763	TPPP3, NES, RHOQ	43	700	19662	1.95967	1	0.969428	99.9428
GOTERM_CC_ALL	GO:0099513~polymeric cytoskeletal fiber	3	6.52174	0.443763	TPPP3, NES, RHOQ	43	700	19662	1.95967	1	0.969428	99.9428
GOTERM_CC_ALL	GO:0044430~cytoskeletal part	4	8.69565	0.651149	MYL6, TPPP3, NES, RHOQ	43	1544	19662	1.1846	1	0.987366	99.9998
Annotation Cluster 12	Enrichment Score: 0.4009180980700131
Category	Term	Count	%	PValue	Genes	List Total	Pop Hits	Pop Total	Fold Enrichment	Bonferroni	Benjamini	FDR
GOTERM_BP_ALL	GO:0048638~regulation of developmental growth	3	6.52174	0.178756	TNFRSF12A, H19, PIN1	40	356	18082	3.80941	1	0.998058	95.6773
GOTERM_BP_ALL	GO:0050793~regulation of developmental process	8	17.3913	0.220757	TNFRSF12A, COL3A1, BEX1, PLEKHO1, S100A10, RHOQ, H19, PIN1	40	2299	18082	1.57303	1	0.997107	98.129
GOTERM_BP_ALL	GO:0040008~regulation of growth	3	6.52174	0.440092	TNFRSF12A, H19, PIN1	40	688	18082	1.97115	1	0.999179	99.9904
GOTERM_BP_ALL	GO:0048589~developmental growth	3	6.52174	0.459237	TNFRSF12A, H19, PIN1	40	714	18082	1.89937	1	0.999196	99.9945
GOTERM_BP_ALL	GO:0040007~growth	3	6.52174	0.662237	TNFRSF12A, H19, PIN1	40	1035	18082	1.31029	1	0.999546	100
GOTERM_BP_ALL	GO:0051239~regulation of multicellular organismal process	6	13.0435	0.744256	TNFRSF12A, COL3A1, BEX1, CORT, H19, PIN1	40	2804	18082	0.967297	1	0.999786	100
Annotation Cluster 13	Enrichment Score: 0.3932401605509776
Category	Term	Count	%	PValue	Genes	List Total	Pop Hits	Pop Total	Fold Enrichment	Bonferroni	Benjamini	FDR
GOTERM_CC_ALL	GO:0005743~mitochondrial inner membrane	3	6.52174	0.222061	NDUFA8, ROMO1, RHBDL1	43	415	19662	3.30546	1	0.953537	95.9093
GOTERM_CC_ALL	GO:0019866~organelle inner membrane	3	6.52174	0.263304	NDUFA8, ROMO1, RHBDL1	43	467	19662	2.9374	1	0.932058	97.9551
GOTERM_CC_ALL	GO:0005739~mitochondrion	6	13.0435	0.335729	TMEM223, NDUFA8, ROMO1, RHBDL1, NDUFAF2, PIN1	43	1792	19662	1.53099	1	0.968612	99.4523
GOTERM_CC_ALL	GO:0031966~mitochondrial membrane	3	6.52174	0.373717	NDUFA8, ROMO1, RHBDL1	43	607	19662	2.25991	1	0.967666	99.7412
GOTERM_CC_ALL	GO:0031090~organelle membrane	7	15.2174	0.377903	IER3IP1, DOC2A, BAIAP2L2, NDUFA8, ROMO1, RHBDL1, VGF	43	2326	19662	1.37609	1	0.961737	99.7623
GOTERM_CC_ALL	GO:0005740~mitochondrial envelope	3	6.52174	0.408076	NDUFA8, ROMO1, RHBDL1	43	652	19662	2.10394	1	0.966393	99.8738
GOTERM_CC_ALL	GO:0044429~mitochondrial part	3	6.52174	0.560204	NDUFA8, ROMO1, RHBDL1	43	870	19662	1.57674	1	0.971088	99.9971
GOTERM_CC_ALL	GO:0031967~organelle envelope	3	6.52174	0.673968	NDUFA8, ROMO1, RHBDL1	43	1069	19662	1.28322	1	0.988701	99.9999
GOTERM_CC_ALL	GO:0031975~envelope	3	6.52174	0.676505	NDUFA8, ROMO1, RHBDL1	43	1074	19662	1.27725	1	0.988129	99.9999
Annotation Cluster 14	Enrichment Score: 0.39151986594686167
Category	Term	Count	%	PValue	Genes	List Total	Pop Hits	Pop Total	Fold Enrichment	Bonferroni	Benjamini	FDR
GOTERM_CC_ALL	GO:0030659~cytoplasmic vesicle membrane	3	6.52174	0.204009	DOC2A, BAIAP2L2, VGF	43	392	19662	3.49941	1	0.947805	94.5221
GOTERM_CC_ALL	GO:0012506~vesicle membrane	3	6.52174	0.22285	DOC2A, BAIAP2L2, VGF	43	416	19662	3.29752	1	0.946029	95.9617
GOTERM_CC_ALL	GO:0044433~cytoplasmic vesicle part	3	6.52174	0.226006	DOC2A, BAIAP2L2, VGF	43	420	19662	3.26611	1	0.940281	96.1656
GOTERM_CC_ALL	GO:0031090~organelle membrane	7	15.2174	0.377903	IER3IP1, DOC2A, BAIAP2L2, NDUFA8, ROMO1, RHBDL1, VGF	43	2326	19662	1.37609	1	0.961737	99.7623
GOTERM_CC_ALL	GO:0016023~cytoplasmic, membrane-bounded vesicle	4	8.69565	0.41224	IER3IP1, DOC2A, BAIAP2L2, VGF	43	1087	19662	1.68263	1	0.964579	99.8846
GOTERM_CC_ALL	GO:0031410~cytoplasmic vesicle	4	8.69565	0.479744	IER3IP1, DOC2A, BAIAP2L2, VGF	43	1205	19662	1.51786	1	0.964675	99.9756
GOTERM_CC_ALL	GO:0097708~intracellular vesicle	4	8.69565	0.481978	IER3IP1, DOC2A, BAIAP2L2, VGF	43	1209	19662	1.51284	1	0.962697	99.9769
GOTERM_CC_ALL	GO:0098588~bounding membrane of organelle	3	6.52174	0.837152	IER3IP1, DOC2A, VGF	43	1487	19662	0.922507	1	0.998564	100
GOTERM_CC_ALL	GO:0012505~endomembrane system	5	10.8696	0.966424	IER3IP1, DOC2A, S100A10, VGF, CERCAM	43	3661	19662	0.624496	1	0.999988	100
Annotation Cluster 15	Enrichment Score: 0.38141735218776346
Category	Term	Count	%	PValue	Genes	List Total	Pop Hits	Pop Total	Fold Enrichment	Bonferroni	Benjamini	FDR
GOTERM_BP_ALL	GO:0050794~regulation of cellular process	28	60.8696	0.158606	IER3IP1, TNFRSF12A, COL3A1, COPRS, HIST1H2AE, BEX1, ROMO1, RHOQ, VGF, NDUFAF2, H19, PIN1, OAZ2, TAF5L, RASL10A, PLEKHO1, LSM4, FRS3, NES, BAIAP2L2, S100A10, MAFK, DOC2A, ZFP579, HIST1H3A, REM2, CORT, SST	40	10870	18082	1.16443	1	0.998371	93.6369
GOTERM_BP_ALL	GO:0050789~regulation of biological process	28	60.8696	0.259358	IER3IP1, TNFRSF12A, COL3A1, COPRS, HIST1H2AE, BEX1, ROMO1, RHOQ, VGF, NDUFAF2, H19, PIN1, OAZ2, TAF5L, RASL10A, PLEKHO1, LSM4, FRS3, NES, BAIAP2L2, S100A10, MAFK, DOC2A, ZFP579, HIST1H3A, REM2, CORT, SST	40	11372	18082	1.11303	1	0.997505	99.168
GOTERM_BP_ALL	GO:0065007~biological regulation	28	60.8696	0.400494	IER3IP1, TNFRSF12A, COL3A1, COPRS, HIST1H2AE, BEX1, ROMO1, RHOQ, VGF, NDUFAF2, H19, PIN1, OAZ2, TAF5L, RASL10A, PLEKHO1, LSM4, FRS3, NES, BAIAP2L2, S100A10, MAFK, DOC2A, ZFP579, HIST1H3A, REM2, CORT, SST	40	11917	18082	1.06213	1	0.99848	99.9715
GOTERM_BP_ALL	GO:0009987~cellular process	36	78.2609	0.560315	MYL6, UTP3, TPPP3, IER3IP1, TNFRSF12A, COPRS, COL3A1, SHFM1, HIST1H2AE, BEX1, ROMO1, RHOQ, RPLP2, VGF, NAP1L5, NDUFAF2, H19, PIN1, OAZ2, TAF5L, RASL10A, PLEKHO1, LSM4, FRS3, NES, RPP21, BAIAP2L2, PNCK, S100A10, MAFK, ZFP579, DOC2A, HIST1H3A, REM2, CORT, SST	40	16073	18082	1.01249	1	0.999415	99.9998
GOTERM_BP_ALL	GO:0044699~single-organism process	31	67.3913	0.627115	MYL6, UTP3, TPPP3, IER3IP1, TNFRSF12A, COPRS, COL3A1, HIST1H2AE, BEX1, ROMO1, RHOQ, VGF, NDUFAF2, H19, PIN1, OAZ2, RASL10A, PLEKHO1, LSM4, FRS3, TMEM223, NES, BAIAP2L2, NDUFA8, S100A10, MAFK, DOC2A, HIST1H3A, REM2, CORT, SST	40	14030	18082	0.998828	1	0.999575	100
GOTERM_BP_ALL	GO:0044763~single-organism cellular process	25	54.3478	0.888999	MYL6, TPPP3, NES, IER3IP1, BAIAP2L2, TNFRSF12A, HIST1H2AE, COL3A1, BEX1, ROMO1, RHOQ, S100A10, VGF, NDUFAF2, PIN1, OAZ2, DOC2A, RASL10A, REM2, HIST1H3A, PLEKHO1, LSM4, FRS3, CORT, SST	40	12536	18082	0.901504	1	0.999977	100
Annotation Cluster 16	Enrichment Score: 0.36755370352439476
Category	Term	Count	%	PValue	Genes	List Total	Pop Hits	Pop Total	Fold Enrichment	Bonferroni	Benjamini	FDR
GOTERM_BP_ALL	GO:0007267~cell-cell signaling	5	10.8696	0.304112	DOC2A, VGF, SST, NDUFAF2, PIN1	40	1294	18082	1.74672	1	0.99681	99.6921
GOTERM_CC_ALL	GO:0097458~neuron part	5	10.8696	0.459172	DOC2A, LSM4, VGF, SST, PIN1	43	1620	19662	1.41128	1	0.971519	99.96
GOTERM_CC_ALL	GO:0042995~cell projection	6	13.0435	0.479066	DOC2A, TNFRSF12A, PLEKHO1, LSM4, VGF, PIN1	43	2120	19662	1.29412	1	0.967154	99.9752
GOTERM_CC_ALL	GO:0043005~neuron projection	4	8.69565	0.506268	DOC2A, LSM4, VGF, PIN1	43	1253	19662	1.45972	1	0.968267	99.9875
Annotation Cluster 17	Enrichment Score: 0.35727222437827805
Category	Term	Count	%	PValue	Genes	List Total	Pop Hits	Pop Total	Fold Enrichment	Bonferroni	Benjamini	FDR
GOTERM_BP_ALL	GO:0044802~single-organism membrane organization	4	8.69565	0.204261	DOC2A, BAIAP2L2, S100A10, RHOQ	40	724	18082	2.49751	1	0.998192	97.3866
GOTERM_BP_ALL	GO:0061024~membrane organization	4	8.69565	0.283632	DOC2A, BAIAP2L2, S100A10, RHOQ	40	861	18082	2.10012	1	0.997745	99.511
GOTERM_CC_ALL	GO:0098805~whole membrane	4	8.69565	0.523589	DOC2A, S100A10, RHOQ, VGF	43	1285	19662	1.42336	1	0.966574	99.992
GOTERM_BP_ALL	GO:1902580~single-organism cellular localization	3	6.52174	0.620675	DOC2A, S100A10, RHOQ	40	960	18082	1.41266	1	0.999565	100
GOTERM_BP_ALL	GO:1902578~single-organism localization	6	13.0435	0.868647	OAZ2, DOC2A, S100A10, RHOQ, VGF, NDUFAF2	40	3325	18082	0.815729	1	0.999965	100
Annotation Cluster 18	Enrichment Score: 0.3341297579013199
Category	Term	Count	%	PValue	Genes	List Total	Pop Hits	Pop Total	Fold Enrichment	Bonferroni	Benjamini	FDR
GOTERM_BP_ALL	GO:0042127~regulation of cell proliferation	6	13.0435	0.277897	NES, HIST1H2AE, BEX1, ROMO1, H19, PIN1	40	1642	18082	1.65183	1	0.997646	99.4447
GOTERM_BP_ALL	GO:0008283~cell proliferation	5	10.8696	0.585955	NES, HIST1H2AE, BEX1, ROMO1, H19	40	1874	18082	1.20611	1	0.99956	99.9999
GOTERM_BP_ALL	GO:0008284~positive regulation of cell proliferation	3	6.52174	0.610748	NES, BEX1, ROMO1	40	943	18082	1.43812	1	0.999523	100
Annotation Cluster 19	Enrichment Score: 0.3242547722018659
Category	Term	Count	%	PValue	Genes	List Total	Pop Hits	Pop Total	Fold Enrichment	Bonferroni	Benjamini	FDR
GOTERM_BP_ALL	GO:0007167~enzyme linked receptor protein signaling pathway	6	13.0435	0.0310124	BAIAP2L2, COL3A1, BEX1, RHOQ, FRS3, PIN1	40	824	18082	3.29163	1	0.999795	39.4989
GOTERM_BP_ALL	GO:0031589~cell-substrate adhesion	3	6.52174	0.134278	TNFRSF12A, COL3A1, S100A10	40	297	18082	4.56616	1	0.99939	89.9741
GOTERM_BP_ALL	GO:0010720~positive regulation of cell development	4	8.69565	0.136092	TNFRSF12A, BEX1, S100A10, PIN1	40	595	18082	3.03899	1	0.999229	90.3038
GOTERM_BP_ALL	GO:0071363~cellular response to growth factor stimulus	4	8.69565	0.138067	COL3A1, BEX1, FRS3, PIN1	40	599	18082	3.0187	1	0.998736	90.6515
GOTERM_BP_ALL	GO:0070848~response to growth factor	4	8.69565	0.150127	COL3A1, BEX1, FRS3, PIN1	40	623	18082	2.90241	1	0.998489	92.5333
GOTERM_BP_ALL	GO:0060284~regulation of cell development	5	10.8696	0.169804	TNFRSF12A, COL3A1, BEX1, S100A10, PIN1	40	1006	18082	2.24677	1	0.99771	94.8612
GOTERM_BP_ALL	GO:0070887~cellular response to chemical stimulus	9	19.5652	0.191341	BAIAP2L2, COL3A1, BEX1, ROMO1, S100A10, RHOQ, FRS3, NDUFAF2, PIN1	40	2607	18082	1.56059	1	0.99827	96.6211
GOTERM_BP_ALL	GO:0007399~nervous system development	8	17.3913	0.20857	TMEM223, UTP3, NES, TNFRSF12A, COL3A1, BEX1, MAFK, PIN1	40	2261	18082	1.59947	1	0.997531	97.6034
GOTERM_BP_ALL	GO:0007166~cell surface receptor signaling pathway	8	17.3913	0.213987	BAIAP2L2, TNFRSF12A, COL3A1, BEX1, RHOQ, FRS3, SST, PIN1	40	2278	18082	1.58753	1	0.997258	97.8522
GOTERM_BP_ALL	GO:0050793~regulation of developmental process	8	17.3913	0.220757	TNFRSF12A, COL3A1, BEX1, PLEKHO1, S100A10, RHOQ, H19, PIN1	40	2299	18082	1.57303	1	0.997107	98.129
GOTERM_BP_ALL	GO:0006928~movement of cell or subcellular component	6	13.0435	0.31328	MYL6, TNFRSF12A, COL3A1, PLEKHO1, SST, PIN1	40	1724	18082	1.57326	1	0.996112	99.7508
GOTERM_BP_ALL	GO:0048870~cell motility	5	10.8696	0.331061	TNFRSF12A, COL3A1, PLEKHO1, SST, PIN1	40	1348	18082	1.67674	1	0.99714	99.836
GOTERM_BP_ALL	GO:0051674~localization of cell	5	10.8696	0.331061	TNFRSF12A, COL3A1, PLEKHO1, SST, PIN1	40	1348	18082	1.67674	1	0.99714	99.836
GOTERM_BP_ALL	GO:0045597~positive regulation of cell differentiation	4	8.69565	0.355486	TNFRSF12A, BEX1, S100A10, PIN1	40	981	18082	1.84322	1	0.997506	99.9094
GOTERM_BP_ALL	GO:0040011~locomotion	5	10.8696	0.422069	TNFRSF12A, COL3A1, PLEKHO1, SST, PIN1	40	1529	18082	1.47825	1	0.998879	99.9841
GOTERM_BP_ALL	GO:0007155~cell adhesion	5	10.8696	0.448939	TNFRSF12A, COL3A1, HIST1H3A, S100A10, CERCAM	40	1583	18082	1.42783	1	0.999205	99.9926
GOTERM_BP_ALL	GO:0022610~biological adhesion	5	10.8696	0.454869	TNFRSF12A, COL3A1, HIST1H3A, S100A10, CERCAM	40	1595	18082	1.41708	1	0.999244	99.9937
GOTERM_BP_ALL	GO:2000145~regulation of cell motility	3	6.52174	0.50756	COL3A1, SST, PIN1	40	782	18082	1.73421	1	0.99948	99.9988
GOTERM_BP_ALL	GO:0051094~positive regulation of developmental process	4	8.69565	0.512797	TNFRSF12A, BEX1, S100A10, PIN1	40	1252	18082	1.44425	1	0.999461	99.999
GOTERM_BP_ALL	GO:0040012~regulation of locomotion	3	6.52174	0.532714	COL3A1, SST, PIN1	40	819	18082	1.65586	1	0.999497	99.9995
GOTERM_BP_ALL	GO:0050767~regulation of neurogenesis	3	6.52174	0.536049	TNFRSF12A, COL3A1, BEX1	40	824	18082	1.64581	1	0.999497	99.9995
GOTERM_BP_ALL	GO:0051093~negative regulation of developmental process	3	6.52174	0.549886	COL3A1, BEX1, H19	40	845	18082	1.60491	1	0.999473	99.9997
GOTERM_BP_ALL	GO:0051270~regulation of cellular component movement	3	6.52174	0.550538	COL3A1, SST, PIN1	40	846	18082	1.60301	1	0.999445	99.9997
GOTERM_BP_ALL	GO:0045595~regulation of cell differentiation	5	10.8696	0.553633	TNFRSF12A, COL3A1, BEX1, S100A10, PIN1	40	1802	18082	1.2543	1	0.999408	99.9997
GOTERM_BP_ALL	GO:0051960~regulation of nervous system development	3	6.52174	0.598227	TNFRSF12A, COL3A1, BEX1	40	922	18082	1.47088	1	0.999538	100
GOTERM_BP_ALL	GO:0048699~generation of neurons	4	8.69565	0.650588	TNFRSF12A, COL3A1, BEX1, PIN1	40	1526	18082	1.18493	1	0.999503	100
GOTERM_BP_ALL	GO:0072359~circulatory system development	3	6.52174	0.676315	TNFRSF12A, COL3A1, PIN1	40	1062	18082	1.27698	1	0.999588	100
GOTERM_BP_ALL	GO:0072358~cardiovascular system development	3	6.52174	0.676315	TNFRSF12A, COL3A1, PIN1	40	1062	18082	1.27698	1	0.999588	100
GOTERM_BP_ALL	GO:0022008~neurogenesis	4	8.69565	0.698742	TNFRSF12A, COL3A1, BEX1, PIN1	40	1638	18082	1.10391	1	0.999691	100
GOTERM_BP_ALL	GO:0051241~negative regulation of multicellular organismal process	3	6.52174	0.722222	COL3A1, BEX1, H19	40	1157	18082	1.17213	1	0.999768	100
GOTERM_BP_ALL	GO:0016477~cell migration	3	6.52174	0.740771	TNFRSF12A, COL3A1, PLEKHO1	40	1199	18082	1.13107	1	0.999789	100
GOTERM_BP_ALL	GO:0048468~cell development	5	10.8696	0.741528	TNFRSF12A, COL3A1, BEX1, S100A10, PIN1	40	2278	18082	0.992208	1	0.999782	100
GOTERM_BP_ALL	GO:0051239~regulation of multicellular organismal process	6	13.0435	0.744256	TNFRSF12A, COL3A1, BEX1, CORT, H19, PIN1	40	2804	18082	0.967297	1	0.999786	100
GOTERM_BP_ALL	GO:0048518~positive regulation of biological process	11	23.913	0.749912	OAZ2, NES, BAIAP2L2, TNFRSF12A, COL3A1, HIST1H3A, BEX1, ROMO1, S100A10, RHOQ, PIN1	40	5311	18082	0.936274	1	0.999784	100
GOTERM_BP_ALL	GO:0048869~cellular developmental process	9	19.5652	0.782144	NES, TNFRSF12A, COL3A1, BEX1, PLEKHO1, ROMO1, S100A10, RHOQ, PIN1	40	4465	18082	0.911187	1	0.999867	100
GOTERM_BP_ALL	GO:2000026~regulation of multicellular organismal development	4	8.69565	0.788545	TNFRSF12A, COL3A1, BEX1, PIN1	40	1888	18082	0.957733	1	0.999858	100
GOTERM_BP_ALL	GO:0009967~positive regulation of signal transduction	3	6.52174	0.791452	TNFRSF12A, COL3A1, PIN1	40	1328	18082	1.0212	1	0.999863	100
GOTERM_BP_ALL	GO:0048585~negative regulation of response to stimulus	3	6.52174	0.7992	COL3A1, NDUFAF2, PIN1	40	1350	18082	1.00456	1	0.999866	100
GOTERM_BP_ALL	GO:0030182~neuron differentiation	3	6.52174	0.809036	TNFRSF12A, BEX1, PIN1	40	1379	18082	0.98343	1	0.999878	100
GOTERM_BP_ALL	GO:0010647~positive regulation of cell communication	3	6.52174	0.842947	TNFRSF12A, COL3A1, PIN1	40	1490	18082	0.910168	1	0.999932	100
GOTERM_BP_ALL	GO:0023056~positive regulation of signaling	3	6.52174	0.844897	TNFRSF12A, COL3A1, PIN1	40	1497	18082	0.905912	1	0.99993	100
GOTERM_BP_ALL	GO:0048522~positive regulation of cellular process	9	19.5652	0.852016	NES, BAIAP2L2, TNFRSF12A, COL3A1, BEX1, ROMO1, S100A10, RHOQ, PIN1	40	4808	18082	0.846183	1	0.999942	100
GOTERM_BP_ALL	GO:0048583~regulation of response to stimulus	6	13.0435	0.86901	TNFRSF12A, COL3A1, HIST1H3A, LSM4, NDUFAF2, PIN1	40	3327	18082	0.815239	1	0.999964	100
GOTERM_BP_ALL	GO:0051240~positive regulation of multicellular organismal process	3	6.52174	0.870289	TNFRSF12A, BEX1, PIN1	40	1596	18082	0.849718	1	0.999963	100
GOTERM_BP_ALL	GO:0010646~regulation of cell communication	5	10.8696	0.871271	TNFRSF12A, COL3A1, VGF, NDUFAF2, PIN1	40	2785	18082	0.81158	1	0.999962	100
GOTERM_BP_ALL	GO:0023051~regulation of signaling	5	10.8696	0.875593	TNFRSF12A, COL3A1, VGF, NDUFAF2, PIN1	40	2808	18082	0.804932	1	0.999965	100
GOTERM_BP_ALL	GO:0048584~positive regulation of response to stimulus	3	6.52174	0.91683	TNFRSF12A, COL3A1, PIN1	40	1834	18082	0.739449	1	0.999988	100
GOTERM_BP_ALL	GO:0030154~cell differentiation	6	13.0435	0.962594	TNFRSF12A, COL3A1, BEX1, PLEKHO1, S100A10, PIN1	40	4143	18082	0.654671	1	0.999999	100
GOTERM_BP_ALL	GO:0009966~regulation of signal transduction	3	6.52174	0.976681	TNFRSF12A, COL3A1, PIN1	40	2468	18082	0.549494	1	1	100
Annotation Cluster 20	Enrichment Score: 0.3177478990104711
Category	Term	Count	%	PValue	Genes	List Total	Pop Hits	Pop Total	Fold Enrichment	Bonferroni	Benjamini	FDR
GOTERM_BP_ALL	GO:0007399~nervous system development	8	17.3913	0.20857	TMEM223, UTP3, NES, TNFRSF12A, COL3A1, BEX1, MAFK, PIN1	40	2261	18082	1.59947	1	0.997531	97.6034
GOTERM_BP_ALL	GO:0007420~brain development	3	6.52174	0.481591	UTP3, NES, COL3A1	40	745	18082	1.82034	1	0.999325	99.9972
GOTERM_BP_ALL	GO:0060322~head development	3	6.52174	0.513755	UTP3, NES, COL3A1	40	791	18082	1.71448	1	0.999432	99.999
GOTERM_BP_ALL	GO:0007417~central nervous system development	3	6.52174	0.625854	UTP3, NES, COL3A1	40	969	18082	1.39954	1	0.999587	100
GOTERM_BP_ALL	GO:0048513~animal organ development	7	15.2174	0.798181	UTP3, MYL6, NES, COL3A1, COPRS, VGF, PIN1	40	3520	18082	0.898963	1	0.999869	100
Annotation Cluster 21	Enrichment Score: 0.3143353476903439
Category	Term	Count	%	PValue	Genes	List Total	Pop Hits	Pop Total	Fold Enrichment	Bonferroni	Benjamini	FDR
GOTERM_BP_ALL	GO:0022604~regulation of cell morphogenesis	4	8.69565	0.12926	TNFRSF12A, PLEKHO1, S100A10, RHOQ	40	581	18082	3.11222	1	0.999425	89.0058
GOTERM_BP_ALL	GO:0050793~regulation of developmental process	8	17.3913	0.220757	TNFRSF12A, COL3A1, BEX1, PLEKHO1, S100A10, RHOQ, H19, PIN1	40	2299	18082	1.57303	1	0.997107	98.129
GOTERM_BP_ALL	GO:0051130~positive regulation of cellular component organization	5	10.8696	0.28387	NES, BAIAP2L2, TNFRSF12A, S100A10, RHOQ	40	1253	18082	1.80387	1	0.997519	99.5136
GOTERM_BP_ALL	GO:0000902~cell morphogenesis	5	10.8696	0.298659	NES, TNFRSF12A, PLEKHO1, S100A10, RHOQ	40	1283	18082	1.76169	1	0.997215	99.6513
GOTERM_BP_ALL	GO:0032989~cellular component morphogenesis	5	10.8696	0.348139	NES, TNFRSF12A, PLEKHO1, S100A10, RHOQ	40	1382	18082	1.63549	1	0.997299	99.8915
GOTERM_BP_ALL	GO:0022603~regulation of anatomical structure morphogenesis	4	8.69565	0.386589	TNFRSF12A, PLEKHO1, S100A10, RHOQ	40	1033	18082	1.75044	1	0.998111	99.9588
GOTERM_BP_ALL	GO:0051128~regulation of cellular component organization	7	15.2174	0.416557	NES, BAIAP2L2, TNFRSF12A, PLEKHO1, S100A10, RHOQ, PIN1	40	2399	18082	1.31903	1	0.998834	99.9815
GOTERM_BP_ALL	GO:0048858~cell projection morphogenesis	3	6.52174	0.540031	NES, TNFRSF12A, PLEKHO1	40	830	18082	1.63392	1	0.99947	99.9996
GOTERM_BP_ALL	GO:0032990~cell part morphogenesis	3	6.52174	0.561526	NES, TNFRSF12A, PLEKHO1	40	863	18082	1.57144	1	0.999393	99.9998
GOTERM_BP_ALL	GO:0030030~cell projection organization	4	8.69565	0.586571	NES, TNFRSF12A, PLEKHO1, RHOQ	40	1392	18082	1.29899	1	0.999537	99.9999
GOTERM_BP_ALL	GO:0009653~anatomical structure morphogenesis	6	13.0435	0.725868	NES, TNFRSF12A, COL3A1, PLEKHO1, S100A10, RHOQ	40	2744	18082	0.988448	1	0.999765	100
GOTERM_BP_ALL	GO:0048869~cellular developmental process	9	19.5652	0.782144	NES, TNFRSF12A, COL3A1, BEX1, PLEKHO1, ROMO1, S100A10, RHOQ, PIN1	40	4465	18082	0.911187	1	0.999867	100
GOTERM_BP_ALL	GO:0048522~positive regulation of cellular process	9	19.5652	0.852016	NES, BAIAP2L2, TNFRSF12A, COL3A1, BEX1, ROMO1, S100A10, RHOQ, PIN1	40	4808	18082	0.846183	1	0.999942	100
GOTERM_CC_ALL	GO:0005886~plasma membrane	10	21.7391	0.90531	DOC2A, BAIAP2L2, TNFRSF12A, CAR11, RASL10A, COPRS, REM2, PLEKHO1, S100A10, RHOQ	43	5762	19662	0.793571	1	0.999697	100
GOTERM_CC_ALL	GO:0071944~cell periphery	10	21.7391	0.919055	DOC2A, BAIAP2L2, TNFRSF12A, CAR11, RASL10A, COPRS, REM2, PLEKHO1, S100A10, RHOQ	43	5885	19662	0.776985	1	0.999798	100
GOTERM_BP_ALL	GO:0030154~cell differentiation	6	13.0435	0.962594	TNFRSF12A, COL3A1, BEX1, PLEKHO1, S100A10, PIN1	40	4143	18082	0.654671	1	0.999999	100
Annotation Cluster 22	Enrichment Score: 0.2805475950748902
Category	Term	Count	%	PValue	Genes	List Total	Pop Hits	Pop Total	Fold Enrichment	Bonferroni	Benjamini	FDR
GOTERM_BP_ALL	GO:0007399~nervous system development	8	17.3913	0.20857	TMEM223, UTP3, NES, TNFRSF12A, COL3A1, BEX1, MAFK, PIN1	40	2261	18082	1.59947	1	0.997531	97.6034
GOTERM_BP_ALL	GO:0044767~single-organism developmental process	16	34.7826	0.262929	TMEM223, MYL6, UTP3, NES, TNFRSF12A, COL3A1, COPRS, BEX1, ROMO1, RHOQ, S100A10, VGF, MAFK, PIN1, H19, PLEKHO1	40	5879	18082	1.23028	1	0.996879	99.2297
GOTERM_BP_ALL	GO:0032502~developmental process	16	34.7826	0.288968	TMEM223, MYL6, UTP3, NES, TNFRSF12A, COL3A1, COPRS, BEX1, ROMO1, RHOQ, S100A10, VGF, MAFK, PIN1, H19, PLEKHO1	40	5983	18082	1.20889	1	0.997341	99.566
GOTERM_BP_ALL	GO:0048856~anatomical structure development	14	30.4348	0.492768	TMEM223, MYL6, UTP3, NES, TNFRSF12A, COL3A1, COPRS, BEX1, RHOQ, S100A10, MAFK, VGF, PIN1, PLEKHO1	40	5799	18082	1.09134	1	0.999428	99.998
GOTERM_BP_ALL	GO:0048731~system development	11	23.913	0.55285	TMEM223, UTP3, MYL6, NES, TNFRSF12A, COL3A1, COPRS, BEX1, VGF, MAFK, PIN1	40	4610	18082	1.07864	1	0.999436	99.9997
GOTERM_BP_ALL	GO:0007275~multicellular organism development	11	23.913	0.7213	TMEM223, UTP3, MYL6, NES, TNFRSF12A, COL3A1, COPRS, BEX1, VGF, MAFK, PIN1	40	5195	18082	0.95718	1	0.999775	100
GOTERM_BP_ALL	GO:0048869~cellular developmental process	9	19.5652	0.782144	NES, TNFRSF12A, COL3A1, BEX1, PLEKHO1, ROMO1, S100A10, RHOQ, PIN1	40	4465	18082	0.911187	1	0.999867	100
GOTERM_BP_ALL	GO:0048513~animal organ development	7	15.2174	0.798181	UTP3, MYL6, NES, COL3A1, COPRS, VGF, PIN1	40	3520	18082	0.898963	1	0.999869	100
GOTERM_BP_ALL	GO:0044707~single-multicellular organism process	12	26.087	0.826644	TMEM223, UTP3, MYL6, NES, TNFRSF12A, COL3A1, COPRS, BEX1, VGF, MAFK, H19, PIN1	40	6161	18082	0.880474	1	0.999909	100
GOTERM_BP_ALL	GO:0032501~multicellular organismal process	13	28.2609	0.973896	MYL6, UTP3, TMEM223, NES, TNFRSF12A, COL3A1, COPRS, BEX1, MAFK, VGF, PIN1, H19, CORT	40	8084	18082	0.726948	1	1	100
Annotation Cluster 23	Enrichment Score: 0.26689560169853166
Category	Term	Count	%	PValue	Genes	List Total	Pop Hits	Pop Total	Fold Enrichment	Bonferroni	Benjamini	FDR
GOTERM_BP_ALL	GO:0023061~signal release	3	6.52174	0.247617	DOC2A, VGF, NDUFAF2	40	443	18082	3.06129	1	0.997555	98.9307
GOTERM_BP_ALL	GO:0007267~cell-cell signaling	5	10.8696	0.304112	DOC2A, VGF, SST, NDUFAF2, PIN1	40	1294	18082	1.74672	1	0.99681	99.6921
GOTERM_BP_ALL	GO:0032940~secretion by cell	3	6.52174	0.606012	DOC2A, VGF, NDUFAF2	40	935	18082	1.45043	1	0.999531	100
GOTERM_BP_ALL	GO:0046903~secretion	3	6.52174	0.683433	DOC2A, VGF, NDUFAF2	40	1076	18082	1.26036	1	0.999628	100
GOTERM_BP_ALL	GO:1902578~single-organism localization	6	13.0435	0.868647	OAZ2, DOC2A, S100A10, RHOQ, VGF, NDUFAF2	40	3325	18082	0.815729	1	0.999965	100
GOTERM_BP_ALL	GO:0044765~single-organism transport	5	10.8696	0.924255	OAZ2, DOC2A, RHOQ, VGF, NDUFAF2	40	3128	18082	0.722586	1	0.999991	100
Annotation Cluster 24	Enrichment Score: 0.26420972873895887
Category	Term	Count	%	PValue	Genes	List Total	Pop Hits	Pop Total	Fold Enrichment	Bonferroni	Benjamini	FDR
GOTERM_BP_ALL	GO:0006325~chromatin organization	6	13.0435	0.020517	UTP3, TAF5L, HIST1H3A, COPRS, HIST1H2AE, NAP1L5	40	739	18082	3.67023	1	0.999986	28.1557
GOTERM_CC_ALL	GO:0031974~membrane-enclosed lumen	13	28.2609	0.0728964	UTP3, HYPK, NDUFA8, RPP21, SHFM1, HIST1H2AE, MAFK, CERCAM, PIN1, TAF5L, RASL10A, HIST1H3A, LSM4	43	3628	19662	1.63846	1	0.842794	61.844
GOTERM_BP_ALL	GO:0051276~chromosome organization	6	13.0435	0.0795555	UTP3, TAF5L, HIST1H3A, COPRS, HIST1H2AE, NAP1L5	40	1075	18082	2.52307	1	0.999868	73.3481
GOTERM_CC_ALL	GO:0031981~nuclear lumen	11	23.913	0.121693	HYPK, UTP3, TAF5L, RPP21, RASL10A, HIST1H3A, SHFM1, HIST1H2AE, LSM4, MAFK, PIN1	43	3139	19662	1.60236	1	0.942427	80.8286
GOTERM_CC_ALL	GO:0070013~intracellular organelle lumen	12	26.087	0.122498	HYPK, UTP3, TAF5L, RPP21, RASL10A, HIST1H3A, SHFM1, HIST1H2AE, LSM4, CERCAM, MAFK, PIN1	43	3548	19662	1.54652	1	0.926725	81.0513
GOTERM_CC_ALL	GO:0043233~organelle lumen	12	26.087	0.124898	HYPK, UTP3, TAF5L, RPP21, RASL10A, HIST1H3A, SHFM1, HIST1H2AE, LSM4, CERCAM, MAFK, PIN1	43	3561	19662	1.54088	1	0.913355	81.7003
GOTERM_BP_ALL	GO:0010467~gene expression	15	32.6087	0.212208	UTP3, RPP21, SHFM1, HIST1H2AE, COPRS, RPLP2, RHOQ, MAFK, H19, PIN1, TAF5L, ZFP579, HIST1H3A, LSM4, RHBDL1	40	5224	18082	1.298	1	0.99747	97.7733
GOTERM_CC_ALL	GO:0044428~nuclear part	11	23.913	0.235423	HYPK, UTP3, TAF5L, RPP21, RASL10A, HIST1H3A, SHFM1, HIST1H2AE, LSM4, MAFK, PIN1	43	3625	19662	1.38753	1	0.931732	96.7189
GOTERM_CC_ALL	GO:0005634~nucleus	18	39.1304	0.238268	UTP3, HYPK, RPP21, PNCK, COPRS, SHFM1, HIST1H2AE, BEX1, MAFK, NAP1L5, PIN1, OAZ2, TAF5L, ZFP579, RASL10A, HIST1H3A, PLEKHO1, LSM4	43	6713	19662	1.22607	1	0.925969	96.8709
GOTERM_BP_ALL	GO:0016569~covalent chromatin modification	3	6.52174	0.305513	UTP3, TAF5L, COPRS	40	515	18082	2.6333	1	0.99664	99.7019
GOTERM_BP_ALL	GO:0090304~nucleic acid metabolic process	13	28.2609	0.331688	UTP3, RPP21, SHFM1, HIST1H2AE, COPRS, RHOQ, MAFK, PIN1, H19, TAF5L, ZFP579, HIST1H3A, LSM4	40	4805	18082	1.22303	1	0.996949	99.8385
GOTERM_CC_ALL	GO:0005654~nucleoplasm	7	15.2174	0.377503	HYPK, TAF5L, HIST1H3A, SHFM1, LSM4, MAFK, PIN1	43	2325	19662	1.37668	1	0.965403	99.7604
GOTERM_BP_ALL	GO:0016070~RNA metabolic process	11	23.913	0.463238	UTP3, TAF5L, ZFP579, RPP21, HIST1H3A, COPRS, HIST1H2AE, LSM4, RHOQ, MAFK, PIN1	40	4331	18082	1.14813	1	0.999204	99.9951
GOTERM_BP_ALL	GO:0034641~cellular nitrogen compound metabolic process	15	32.6087	0.475184	UTP3, RPP21, SHFM1, HIST1H2AE, COPRS, RPLP2, RHOQ, MAFK, H19, PIN1, OAZ2, TAF5L, ZFP579, HIST1H3A, LSM4	40	6198	18082	1.09402	1	0.999282	99.9966
GOTERM_BP_ALL	GO:0006139~nucleobase-containing compound metabolic process	13	28.2609	0.507696	UTP3, RPP21, SHFM1, HIST1H2AE, COPRS, RHOQ, MAFK, PIN1, H19, TAF5L, ZFP579, HIST1H3A, LSM4	40	5389	18082	1.09049	1	0.999441	99.9988
GOTERM_BP_ALL	GO:0006351~transcription, DNA-templated	8	17.3913	0.523333	TAF5L, ZFP579, HIST1H3A, COPRS, HIST1H2AE, RHOQ, MAFK, PIN1	40	3129	18082	1.15577	1	0.999427	99.9993
GOTERM_BP_ALL	GO:0046483~heterocycle metabolic process	13	28.2609	0.540284	UTP3, RPP21, SHFM1, HIST1H2AE, COPRS, RHOQ, MAFK, PIN1, H19, TAF5L, ZFP579, HIST1H3A, LSM4	40	5497	18082	1.06906	1	0.999436	99.9996
GOTERM_BP_ALL	GO:0006725~cellular aromatic compound metabolic process	13	28.2609	0.559073	UTP3, RPP21, SHFM1, HIST1H2AE, COPRS, RHOQ, MAFK, PIN1, H19, TAF5L, ZFP579, HIST1H3A, LSM4	40	5560	18082	1.05695	1	0.999436	99.9998
GOTERM_BP_ALL	GO:0006807~nitrogen compound metabolic process	15	32.6087	0.573213	UTP3, RPP21, SHFM1, HIST1H2AE, COPRS, RPLP2, RHOQ, MAFK, H19, PIN1, OAZ2, TAF5L, ZFP579, HIST1H3A, LSM4	40	6537	18082	1.03729	1	0.999492	99.9999
GOTERM_BP_ALL	GO:1901360~organic cyclic compound metabolic process	13	28.2609	0.608912	UTP3, RPP21, SHFM1, HIST1H2AE, COPRS, RHOQ, MAFK, PIN1, H19, TAF5L, ZFP579, HIST1H3A, LSM4	40	5731	18082	1.02541	1	0.999532	100
GOTERM_BP_ALL	GO:0019219~regulation of nucleobase-containing compound metabolic process	9	19.5652	0.633629	TAF5L, ZFP579, HIST1H3A, COPRS, HIST1H2AE, RHOQ, MAFK, H19, PIN1	40	3924	18082	1.03681	1	0.999585	100
GOTERM_BP_ALL	GO:0006355~regulation of transcription, DNA-templated	8	17.3913	0.635046	TAF5L, ZFP579, HIST1H3A, COPRS, HIST1H2AE, RHOQ, MAFK, PIN1	40	3449	18082	1.04854	1	0.999574	100
GOTERM_BP_ALL	GO:1903506~regulation of nucleic acid-templated transcription	8	17.3913	0.636031	TAF5L, ZFP579, HIST1H3A, COPRS, HIST1H2AE, RHOQ, MAFK, PIN1	40	3452	18082	1.04762	1	0.999559	100
GOTERM_BP_ALL	GO:2001141~regulation of RNA biosynthetic process	8	17.3913	0.637997	TAF5L, ZFP579, HIST1H3A, COPRS, HIST1H2AE, RHOQ, MAFK, PIN1	40	3458	18082	1.04581	1	0.999529	100
GOTERM_BP_ALL	GO:0097659~nucleic acid-templated transcription	8	17.3913	0.666831	TAF5L, ZFP579, HIST1H3A, COPRS, HIST1H2AE, RHOQ, MAFK, PIN1	40	3548	18082	1.01928	1	0.999567	100
GOTERM_BP_ALL	GO:0032774~RNA biosynthetic process	8	17.3913	0.672134	TAF5L, ZFP579, HIST1H3A, COPRS, HIST1H2AE, RHOQ, MAFK, PIN1	40	3565	18082	1.01442	1	0.999593	100
GOTERM_BP_ALL	GO:0051252~regulation of RNA metabolic process	8	17.3913	0.675231	TAF5L, ZFP579, HIST1H3A, COPRS, HIST1H2AE, RHOQ, MAFK, PIN1	40	3575	18082	1.01158	1	0.999599	100
GOTERM_BP_ALL	GO:0051171~regulation of nitrogen compound metabolic process	9	19.5652	0.720757	TAF5L, ZFP579, HIST1H3A, COPRS, HIST1H2AE, RHOQ, MAFK, H19, PIN1	40	4221	18082	0.963859	1	0.999783	100
GOTERM_BP_ALL	GO:0044271~cellular nitrogen compound biosynthetic process	10	21.7391	0.723411	OAZ2, TAF5L, ZFP579, HIST1H3A, COPRS, HIST1H2AE, RPLP2, RHOQ, MAFK, PIN1	40	4719	18082	0.957936	1	0.999763	100
GOTERM_BP_ALL	GO:0010468~regulation of gene expression	9	19.5652	0.733328	TAF5L, ZFP579, HIST1H3A, COPRS, HIST1H2AE, RHOQ, MAFK, H19, PIN1	40	4268	18082	0.953245	1	0.999771	100
GOTERM_BP_ALL	GO:2000112~regulation of cellular macromolecule biosynthetic process	8	17.3913	0.760201	TAF5L, ZFP579, HIST1H3A, COPRS, HIST1H2AE, RHOQ, MAFK, PIN1	40	3875	18082	0.933265	1	0.999816	100
GOTERM_BP_ALL	GO:0034654~nucleobase-containing compound biosynthetic process	8	17.3913	0.779423	TAF5L, ZFP579, HIST1H3A, COPRS, HIST1H2AE, RHOQ, MAFK, PIN1	40	3952	18082	0.915081	1	0.999864	100
GOTERM_BP_ALL	GO:0010556~regulation of macromolecule biosynthetic process	8	17.3913	0.782803	TAF5L, ZFP579, HIST1H3A, COPRS, HIST1H2AE, RHOQ, MAFK, PIN1	40	3966	18082	0.911851	1	0.99985	100
GOTERM_BP_ALL	GO:0018130~heterocycle biosynthetic process	8	17.3913	0.792961	TAF5L, ZFP579, HIST1H3A, COPRS, HIST1H2AE, RHOQ, MAFK, PIN1	40	4009	18082	0.90207	1	0.999862	100
GOTERM_BP_ALL	GO:0019438~aromatic compound biosynthetic process	8	17.3913	0.796655	TAF5L, ZFP579, HIST1H3A, COPRS, HIST1H2AE, RHOQ, MAFK, PIN1	40	4025	18082	0.898484	1	0.999869	100
GOTERM_BP_ALL	GO:0044237~cellular metabolic process	20	43.4783	0.800939	UTP3, RPP21, PNCK, COL3A1, SHFM1, HIST1H2AE, COPRS, ROMO1, RPLP2, RHOQ, VGF, MAFK, NDUFAF2, H19, PIN1, OAZ2, TAF5L, ZFP579, HIST1H3A, LSM4	40	9794	18082	0.923116	1	0.999861	100
GOTERM_BP_ALL	GO:0043170~macromolecule metabolic process	18	39.1304	0.803431	UTP3, RPP21, PNCK, COL3A1, SHFM1, HIST1H2AE, COPRS, RPLP2, RHOQ, MAFK, H19, PIN1, OAZ2, TAF5L, ZFP579, HIST1H3A, LSM4, RHBDL1	40	8886	18082	0.915699	1	0.999864	100
GOTERM_BP_ALL	GO:1901362~organic cyclic compound biosynthetic process	8	17.3913	0.819544	TAF5L, ZFP579, HIST1H3A, COPRS, HIST1H2AE, RHOQ, MAFK, PIN1	40	4129	18082	0.875854	1	0.999906	100
GOTERM_BP_ALL	GO:0044260~cellular macromolecule metabolic process	16	34.7826	0.81957	UTP3, RPP21, PNCK, COL3A1, SHFM1, HIST1H2AE, COPRS, RPLP2, RHOQ, MAFK, H19, PIN1, TAF5L, ZFP579, HIST1H3A, LSM4	40	8038	18082	0.899826	1	0.999902	100
GOTERM_BP_ALL	GO:0031326~regulation of cellular biosynthetic process	8	17.3913	0.821852	TAF5L, ZFP579, HIST1H3A, COPRS, HIST1H2AE, RHOQ, MAFK, PIN1	40	4140	18082	0.873527	1	0.999904	100
GOTERM_BP_ALL	GO:0009889~regulation of biosynthetic process	8	17.3913	0.83347	TAF5L, ZFP579, HIST1H3A, COPRS, HIST1H2AE, RHOQ, MAFK, PIN1	40	4197	18082	0.861663	1	0.999923	100
GOTERM_BP_ALL	GO:0008152~metabolic process	22	47.8261	0.834478	UTP3, RPP21, NDUFA8, PNCK, COL3A1, COPRS, SHFM1, HIST1H2AE, ROMO1, RPLP2, RHOQ, VGF, MAFK, NDUFAF2, H19, PIN1, OAZ2, TAF5L, ZFP579, HIST1H3A, LSM4, RHBDL1	40	10880	18082	0.914072	1	0.999922	100
GOTERM_MF_ALL	GO:0003677~DNA binding	4	8.69565	0.839867	ZFP579, HIST1H3A, HIST1H2AE, MAFK	37	2159	17446	0.873578	1	0.999978	100
GOTERM_BP_ALL	GO:0043412~macromolecule modification	7	15.2174	0.84177	UTP3, TAF5L, PNCK, COL3A1, HIST1H3A, COPRS, PIN1	40	3719	18082	0.85086	1	0.999932	100
GOTERM_BP_ALL	GO:0034645~cellular macromolecule biosynthetic process	9	19.5652	0.852368	TAF5L, ZFP579, HIST1H3A, COPRS, HIST1H2AE, RPLP2, RHOQ, MAFK, PIN1	40	4810	18082	0.845832	1	0.99994	100
GOTERM_BP_ALL	GO:0009059~macromolecule biosynthetic process	9	19.5652	0.871592	TAF5L, ZFP579, HIST1H3A, COPRS, HIST1H2AE, RPLP2, RHOQ, MAFK, PIN1	40	4925	18082	0.826081	1	0.999961	100
GOTERM_BP_ALL	GO:0010628~positive regulation of gene expression	3	6.52174	0.894507	HIST1H3A, RHOQ, PIN1	40	1708	18082	0.793999	1	0.99998	100
GOTERM_BP_ALL	GO:0019222~regulation of metabolic process	11	23.913	0.894522	OAZ2, TAF5L, ZFP579, HIST1H3A, COPRS, HIST1H2AE, ROMO1, RHOQ, MAFK, H19, PIN1	40	6098	18082	0.815439	1	0.999979	100
GOTERM_BP_ALL	GO:0080090~regulation of primary metabolic process	10	21.7391	0.899178	OAZ2, TAF5L, ZFP579, HIST1H3A, COPRS, HIST1H2AE, RHOQ, MAFK, H19, PIN1	40	5629	18082	0.803073	1	0.999981	100
GOTERM_BP_ALL	GO:0010605~negative regulation of macromolecule metabolic process	4	8.69565	0.901507	HIST1H3A, HIST1H2AE, H19, PIN1	40	2372	18082	0.76231	1	0.999982	100
GOTERM_BP_ALL	GO:0031323~regulation of cellular metabolic process	10	21.7391	0.904712	TAF5L, ZFP579, HIST1H3A, COPRS, HIST1H2AE, ROMO1, RHOQ, MAFK, H19, PIN1	40	5673	18082	0.796845	1	0.999984	100
GOTERM_BP_ALL	GO:0006357~regulation of transcription from RNA polymerase II promoter	3	6.52174	0.906797	RHOQ, MAFK, PIN1	40	1774	18082	0.764459	1	0.999984	100
GOTERM_BP_ALL	GO:0044249~cellular biosynthetic process	10	21.7391	0.911757	OAZ2, TAF5L, ZFP579, HIST1H3A, COPRS, HIST1H2AE, RPLP2, RHOQ, MAFK, PIN1	40	5732	18082	0.788643	1	0.999985	100
GOTERM_BP_ALL	GO:0060255~regulation of macromolecule metabolic process	10	21.7391	0.912565	OAZ2, TAF5L, ZFP579, HIST1H3A, COPRS, HIST1H2AE, RHOQ, MAFK, H19, PIN1	40	5739	18082	0.787681	1	0.999985	100
GOTERM_BP_ALL	GO:1901576~organic substance biosynthetic process	10	21.7391	0.922544	OAZ2, TAF5L, ZFP579, HIST1H3A, COPRS, HIST1H2AE, RPLP2, RHOQ, MAFK, PIN1	40	5830	18082	0.775386	1	0.999991	100
GOTERM_BP_ALL	GO:0009892~negative regulation of metabolic process	4	8.69565	0.930917	HIST1H3A, HIST1H2AE, H19, PIN1	40	2579	18082	0.701124	1	0.999994	100
GOTERM_BP_ALL	GO:0009058~biosynthetic process	10	21.7391	0.931873	OAZ2, TAF5L, ZFP579, HIST1H3A, COPRS, HIST1H2AE, RPLP2, RHOQ, MAFK, PIN1	40	5924	18082	0.763082	1	0.999994	100
GOTERM_BP_ALL	GO:0044238~primary metabolic process	18	39.1304	0.936665	UTP3, RPP21, PNCK, COL3A1, SHFM1, HIST1H2AE, COPRS, RPLP2, RHOQ, MAFK, H19, PIN1, OAZ2, TAF5L, ZFP579, HIST1H3A, LSM4, RHBDL1	40	9853	18082	0.82583	1	0.999995	100
GOTERM_BP_ALL	GO:0031324~negative regulation of cellular metabolic process	3	6.52174	0.971985	HIST1H3A, HIST1H2AE, PIN1	40	2380	18082	0.569811	1	1	100
GOTERM_BP_ALL	GO:0071704~organic substance metabolic process	18	39.1304	0.974094	UTP3, RPP21, PNCK, COL3A1, SHFM1, HIST1H2AE, COPRS, RPLP2, RHOQ, MAFK, H19, PIN1, OAZ2, TAF5L, ZFP579, HIST1H3A, LSM4, RHBDL1	40	10445	18082	0.779023	1	1	100
Annotation Cluster 25	Enrichment Score: 0.2581434029629045
Category	Term	Count	%	PValue	Genes	List Total	Pop Hits	Pop Total	Fold Enrichment	Bonferroni	Benjamini	FDR
GOTERM_BP_ALL	GO:0007264~small GTPase mediated signal transduction	4	8.69565	0.0924871	RASL10A, COL3A1, REM2, RHOQ	40	500	18082	3.6164	1	0.999836	78.7327
GOTERM_MF_ALL	GO:0005525~GTP binding	3	6.52174	0.18679	RASL10A, REM2, RHOQ	37	383	17446	3.69332	1	0.997678	92.0918
GOTERM_MF_ALL	GO:0032561~guanyl ribonucleotide binding	3	6.52174	0.202553	RASL10A, REM2, RHOQ	37	404	17446	3.50134	1	0.993122	93.7804
GOTERM_MF_ALL	GO:0019001~guanyl nucleotide binding	3	6.52174	0.203308	RASL10A, REM2, RHOQ	37	405	17446	3.49269	1	0.98826	93.8523
GOTERM_MF_ALL	GO:0035639~purine ribonucleoside triphosphate binding	4	8.69565	0.753143	RASL10A, PNCK, REM2, RHOQ	37	1858	17446	1.0151	1	0.999998	100
GOTERM_MF_ALL	GO:0032550~purine ribonucleoside binding	4	8.69565	0.757852	RASL10A, PNCK, REM2, RHOQ	37	1872	17446	1.00751	1	0.999996	100
GOTERM_MF_ALL	GO:0001883~purine nucleoside binding	4	8.69565	0.758852	RASL10A, PNCK, REM2, RHOQ	37	1875	17446	1.0059	1	0.999989	100
GOTERM_MF_ALL	GO:0032549~ribonucleoside binding	4	8.69565	0.758852	RASL10A, PNCK, REM2, RHOQ	37	1875	17446	1.0059	1	0.999989	100
GOTERM_MF_ALL	GO:0001882~nucleoside binding	4	8.69565	0.761504	RASL10A, PNCK, REM2, RHOQ	37	1883	17446	1.00162	1	0.999983	100
GOTERM_MF_ALL	GO:0032555~purine ribonucleotide binding	4	8.69565	0.769646	RASL10A, PNCK, REM2, RHOQ	37	1908	17446	0.988498	1	0.999979	100
GOTERM_MF_ALL	GO:0017076~purine nucleotide binding	4	8.69565	0.772842	RASL10A, PNCK, REM2, RHOQ	37	1918	17446	0.983344	1	0.999971	100
GOTERM_BP_ALL	GO:0035556~intracellular signal transduction	5	10.8696	0.773334	RASL10A, COL3A1, REM2, RHOQ, PIN1	40	2380	18082	0.949685	1	0.999848	100
GOTERM_MF_ALL	GO:0032553~ribonucleotide binding	4	8.69565	0.774427	RASL10A, PNCK, REM2, RHOQ	37	1923	17446	0.980787	1	0.999958	100
GOTERM_MF_ALL	GO:0097367~carbohydrate derivative binding	4	8.69565	0.866013	RASL10A, PNCK, REM2, RHOQ	37	2276	17446	0.82867	1	0.999989	100
GOTERM_MF_ALL	GO:1901265~nucleoside phosphate binding	4	8.69565	0.896216	RASL10A, PNCK, REM2, RHOQ	37	2438	17446	0.773607	1	0.999996	100
GOTERM_MF_ALL	GO:0000166~nucleotide binding	4	8.69565	0.896216	RASL10A, PNCK, REM2, RHOQ	37	2438	17446	0.773607	1	0.999996	100
GOTERM_MF_ALL	GO:0036094~small molecule binding	4	8.69565	0.926639	RASL10A, PNCK, REM2, RHOQ	37	2649	17446	0.711987	1	0.999999	100
Annotation Cluster 26	Enrichment Score: 0.25719414550672476
Category	Term	Count	%	PValue	Genes	List Total	Pop Hits	Pop Total	Fold Enrichment	Bonferroni	Benjamini	FDR
GOTERM_BP_ALL	GO:0051098~regulation of binding	3	6.52174	0.152054	NES, S100A10, PIN1	40	321	18082	4.22477	1	0.998253	92.7988
GOTERM_BP_ALL	GO:0071705~nitrogen compound transport	4	8.69565	0.190965	OAZ2, SHFM1, VGF, NDUFAF2	40	700	18082	2.58314	1	0.998537	96.596
GOTERM_BP_ALL	GO:0051641~cellular localization	8	17.3913	0.224337	OAZ2, IER3IP1, DOC2A, SHFM1, S100A10, RHOQ, NDUFAF2, PIN1	40	2310	18082	1.56554	1	0.997052	98.2615
GOTERM_BP_ALL	GO:0060341~regulation of cellular localization	4	8.69565	0.285415	OAZ2, RHOQ, NDUFAF2, PIN1	40	864	18082	2.09282	1	0.997365	99.5301
GOTERM_BP_ALL	GO:0051051~negative regulation of transport	3	6.52174	0.3015	OAZ2, RHOQ, NDUFAF2	40	510	18082	2.65912	1	0.997151	99.6732
GOTERM_BP_ALL	GO:1903827~regulation of cellular protein localization	3	6.52174	0.337465	OAZ2, RHOQ, PIN1	40	555	18082	2.44351	1	0.997089	99.8594
GOTERM_BP_ALL	GO:0032880~regulation of protein localization	4	8.69565	0.366873	OAZ2, RHOQ, NDUFAF2, PIN1	40	1000	18082	1.8082	1	0.997886	99.9318
GOTERM_BP_ALL	GO:0051179~localization	14	30.4348	0.440317	IER3IP1, NDUFA8, TNFRSF12A, COL3A1, SHFM1, RHOQ, S100A10, VGF, NDUFAF2, PIN1, OAZ2, DOC2A, PLEKHO1, SST	40	5623	18082	1.1255	1	0.999115	99.9905
GOTERM_BP_ALL	GO:0032879~regulation of localization	7	15.2174	0.469567	OAZ2, DOC2A, COL3A1, RHOQ, SST, NDUFAF2, PIN1	40	2530	18082	1.25073	1	0.99925	99.9959
GOTERM_BP_ALL	GO:0051649~establishment of localization in cell	5	10.8696	0.516377	OAZ2, IER3IP1, DOC2A, SHFM1, NDUFAF2	40	1722	18082	1.31257	1	0.999381	99.9991
GOTERM_CC_ALL	GO:0098805~whole membrane	4	8.69565	0.523589	DOC2A, S100A10, RHOQ, VGF	43	1285	19662	1.42336	1	0.966574	99.992
GOTERM_BP_ALL	GO:0033036~macromolecule localization	7	15.2174	0.538693	OAZ2, SHFM1, S100A10, RHOQ, VGF, NDUFAF2, PIN1	40	2705	18082	1.16982	1	0.999491	99.9996
GOTERM_BP_ALL	GO:0070201~regulation of establishment of protein localization	3	6.52174	0.546617	OAZ2, RHOQ, NDUFAF2	40	840	18082	1.61446	1	0.999472	99.9997
GOTERM_BP_ALL	GO:0008104~protein localization	6	13.0435	0.591384	OAZ2, S100A10, RHOQ, VGF, NDUFAF2, PIN1	40	2367	18082	1.14588	1	0.999555	99.9999
GOTERM_BP_ALL	GO:0045184~establishment of protein localization	5	10.8696	0.594711	OAZ2, S100A10, RHOQ, VGF, NDUFAF2	40	1894	18082	1.19337	1	0.999532	99.9999
GOTERM_BP_ALL	GO:0044092~negative regulation of molecular function	3	6.52174	0.598227	OAZ2, NES, PIN1	40	922	18082	1.47088	1	0.999538	100
GOTERM_BP_ALL	GO:0034613~cellular protein localization	4	8.69565	0.638704	OAZ2, S100A10, RHOQ, PIN1	40	1500	18082	1.20547	1	0.999484	100
GOTERM_BP_ALL	GO:0070727~cellular macromolecule localization	4	8.69565	0.644221	OAZ2, S100A10, RHOQ, PIN1	40	1512	18082	1.1959	1	0.999489	100
GOTERM_BP_ALL	GO:0050790~regulation of catalytic activity	4	8.69565	0.708415	OAZ2, NES, S100A10, PIN1	40	1662	18082	1.08797	1	0.999739	100
GOTERM_BP_ALL	GO:0006810~transport	9	19.5652	0.748102	OAZ2, IER3IP1, DOC2A, NDUFA8, SHFM1, S100A10, RHOQ, VGF, NDUFAF2	40	4325	18082	0.940682	1	0.999795	100
GOTERM_BP_ALL	GO:0051049~regulation of transport	4	8.69565	0.769165	OAZ2, DOC2A, RHOQ, NDUFAF2	40	1828	18082	0.989168	1	0.999839	100
GOTERM_BP_ALL	GO:0051234~establishment of localization	9	19.5652	0.782607	OAZ2, IER3IP1, DOC2A, NDUFA8, SHFM1, S100A10, RHOQ, VGF, NDUFAF2	40	4467	18082	0.910779	1	0.999863	100
GOTERM_BP_ALL	GO:0046907~intracellular transport	3	6.52174	0.782712	OAZ2, IER3IP1, SHFM1	40	1304	18082	1.03999	1	0.999856	100
GOTERM_BP_ALL	GO:0071702~organic substance transport	5	10.8696	0.800533	OAZ2, SHFM1, RHOQ, VGF, NDUFAF2	40	2476	18082	0.912863	1	0.999865	100
GOTERM_BP_ALL	GO:1902578~single-organism localization	6	13.0435	0.868647	OAZ2, DOC2A, S100A10, RHOQ, VGF, NDUFAF2	40	3325	18082	0.815729	1	0.999965	100
GOTERM_BP_ALL	GO:0065009~regulation of molecular function	4	8.69565	0.869569	OAZ2, NES, S100A10, PIN1	40	2201	18082	0.821536	1	0.999963	100
GOTERM_BP_ALL	GO:0015031~protein transport	3	6.52174	0.899324	OAZ2, VGF, NDUFAF2	40	1733	18082	0.782545	1	0.999981	100
GOTERM_BP_ALL	GO:0009893~positive regulation of metabolic process	5	10.8696	0.907775	OAZ2, HIST1H3A, ROMO1, RHOQ, PIN1	40	3004	18082	0.752413	1	0.999984	100
GOTERM_BP_ALL	GO:0044765~single-organism transport	5	10.8696	0.924255	OAZ2, DOC2A, RHOQ, VGF, NDUFAF2	40	3128	18082	0.722586	1	0.999991	100
GOTERM_BP_ALL	GO:0010604~positive regulation of macromolecule metabolic process	4	8.69565	0.952965	OAZ2, HIST1H3A, RHOQ, PIN1	40	2794	18082	0.647173	1	0.999999	100
GOTERM_BP_ALL	GO:0044710~single-organism metabolic process	4	8.69565	0.991045	NDUFA8, RHOQ, NDUFAF2, PIN1	40	3641	18082	0.496622	1	1	100
Annotation Cluster 27	Enrichment Score: 0.24268932569360332
Category	Term	Count	%	PValue	Genes	List Total	Pop Hits	Pop Total	Fold Enrichment	Bonferroni	Benjamini	FDR
GOTERM_BP_ALL	GO:0007517~muscle organ development	4	8.69565	0.0507519	MYL6, COL3A1, COPRS, PIN1	40	388	18082	4.66031	1	0.999672	56.4302
GOTERM_BP_ALL	GO:0043412~macromolecule modification	7	15.2174	0.84177	UTP3, TAF5L, PNCK, COL3A1, HIST1H3A, COPRS, PIN1	40	3719	18082	0.85086	1	0.999932	100
GOTERM_BP_ALL	GO:0019538~protein metabolic process	9	19.5652	0.908109	OAZ2, TAF5L, PNCK, COL3A1, COPRS, SHFM1, RPLP2, RHBDL1, PIN1	40	5186	18082	0.784506	1	0.999983	100
GOTERM_BP_ALL	GO:0036211~protein modification process	5	10.8696	0.957529	TAF5L, PNCK, COL3A1, COPRS, PIN1	40	3474	18082	0.650619	1	0.999999	100
GOTERM_BP_ALL	GO:0006464~cellular protein modification process	5	10.8696	0.957529	TAF5L, PNCK, COL3A1, COPRS, PIN1	40	3474	18082	0.650619	1	0.999999	100
GOTERM_BP_ALL	GO:0044267~cellular protein metabolic process	6	13.0435	0.983505	TAF5L, PNCK, COL3A1, COPRS, RPLP2, PIN1	40	4608	18082	0.588607	1	1	100
Annotation Cluster 28	Enrichment Score: 0.18597119203926332
Category	Term	Count	%	PValue	Genes	List Total	Pop Hits	Pop Total	Fold Enrichment	Bonferroni	Benjamini	FDR
GOTERM_BP_ALL	GO:0098542~defense response to other organism	3	6.52174	0.385387	HIST1H3A, ROMO1, LSM4	40	616	18082	2.20154	1	0.998204	99.9575
GOTERM_BP_ALL	GO:0006950~response to stress	9	19.5652	0.497463	TNFRSF12A, COL3A1, HIST1H3A, SHFM1, ROMO1, LSM4, VGF, MAFK, SST	40	3518	18082	1.15647	1	0.999399	99.9983
GOTERM_BP_ALL	GO:0051707~response to other organism	3	6.52174	0.657976	HIST1H3A, ROMO1, LSM4	40	1027	18082	1.3205	1	0.999552	100
GOTERM_BP_ALL	GO:0043207~response to external biotic stimulus	3	6.52174	0.658511	HIST1H3A, ROMO1, LSM4	40	1028	18082	1.31921	1	0.999534	100
GOTERM_BP_ALL	GO:0009607~response to biotic stimulus	3	6.52174	0.687445	HIST1H3A, ROMO1, LSM4	40	1084	18082	1.25106	1	0.999642	100
GOTERM_BP_ALL	GO:0009605~response to external stimulus	5	10.8696	0.748965	COL3A1, HIST1H3A, ROMO1, LSM4, VGF	40	2301	18082	0.98229	1	0.999789	100
GOTERM_BP_ALL	GO:0006952~defense response	3	6.52174	0.840408	HIST1H3A, ROMO1, LSM4	40	1481	18082	0.915699	1	0.999932	100
GOTERM_BP_ALL	GO:0051704~multi-organism process	4	8.69565	0.90492	HIST1H3A, ROMO1, LSM4, VGF	40	2393	18082	0.755621	1	0.999983	100
Annotation Cluster 29	Enrichment Score: 0.16975060417706433
Category	Term	Count	%	PValue	Genes	List Total	Pop Hits	Pop Total	Fold Enrichment	Bonferroni	Benjamini	FDR
GOTERM_BP_ALL	GO:0042127~regulation of cell proliferation	6	13.0435	0.277897	NES, HIST1H2AE, BEX1, ROMO1, H19, PIN1	40	1642	18082	1.65183	1	0.997646	99.4447
GOTERM_BP_ALL	GO:0048523~negative regulation of cellular process	10	21.7391	0.638517	OAZ2, NES, COL3A1, HIST1H3A, HIST1H2AE, BEX1, RHOQ, NDUFAF2, H19, PIN1	40	4417	18082	1.02343	1	0.999508	100
GOTERM_BP_ALL	GO:0048519~negative regulation of biological process	10	21.7391	0.733209	OAZ2, NES, COL3A1, HIST1H3A, HIST1H2AE, BEX1, RHOQ, NDUFAF2, H19, PIN1	40	4757	18082	0.950284	1	0.999781	100
GOTERM_BP_ALL	GO:0010629~negative regulation of gene expression	3	6.52174	0.877669	HIST1H3A, HIST1H2AE, H19	40	1628	18082	0.833016	1	0.999966	100
GOTERM_BP_ALL	GO:0010605~negative regulation of macromolecule metabolic process	4	8.69565	0.901507	HIST1H3A, HIST1H2AE, H19, PIN1	40	2372	18082	0.76231	1	0.999982	100
GOTERM_BP_ALL	GO:0009892~negative regulation of metabolic process	4	8.69565	0.930917	HIST1H3A, HIST1H2AE, H19, PIN1	40	2579	18082	0.701124	1	0.999994	100
Annotation Cluster 30	Enrichment Score: 0.14517726133503966
Category	Term	Count	%	PValue	Genes	List Total	Pop Hits	Pop Total	Fold Enrichment	Bonferroni	Benjamini	FDR
GOTERM_BP_ALL	GO:0042981~regulation of apoptotic process	4	8.69565	0.630323	NES, IER3IP1, TNFRSF12A, PIN1	40	1482	18082	1.22011	1	0.999579	100
GOTERM_BP_ALL	GO:0043067~regulation of programmed cell death	4	8.69565	0.637779	NES, IER3IP1, TNFRSF12A, PIN1	40	1498	18082	1.20708	1	0.999551	100
GOTERM_BP_ALL	GO:0010941~regulation of cell death	4	8.69565	0.691337	NES, IER3IP1, TNFRSF12A, PIN1	40	1620	18082	1.11617	1	0.999654	100
GOTERM_BP_ALL	GO:0006915~apoptotic process	4	8.69565	0.752338	NES, IER3IP1, TNFRSF12A, PIN1	40	1779	18082	1.01641	1	0.999787	100
GOTERM_BP_ALL	GO:0012501~programmed cell death	4	8.69565	0.782871	NES, IER3IP1, TNFRSF12A, PIN1	40	1870	18082	0.966952	1	0.999843	100
GOTERM_BP_ALL	GO:0008219~cell death	4	8.69565	0.822073	NES, IER3IP1, TNFRSF12A, PIN1	40	2003	18082	0.902746	1	0.9999	100
Annotation Cluster 31	Enrichment Score: 0.13694514428714408
Category	Term	Count	%	PValue	Genes	List Total	Pop Hits	Pop Total	Fold Enrichment	Bonferroni	Benjamini	FDR
GOTERM_MF_ALL	GO:0003723~RNA binding	4	8.69565	0.697894	UTP3, ZFP579, LSM4, RPLP2	37	1707	17446	1.10489	1	0.999996	100
GOTERM_MF_ALL	GO:0044822~poly(A) RNA binding	3	6.52174	0.717669	UTP3, ZFP579, LSM4	37	1197	17446	1.18174	1	0.999996	100
GOTERM_MF_ALL	GO:0003676~nucleic acid binding	8	17.3913	0.775266	UTP3, ZFP579, HIST1H3A, HIST1H2AE, LSM4, RPLP2, GPATCH3, MAFK	37	4100	17446	0.920026	1	0.999941	100
Annotation Cluster 32	Enrichment Score: 0.11495568812221343
Category	Term	Count	%	PValue	Genes	List Total	Pop Hits	Pop Total	Fold Enrichment	Bonferroni	Benjamini	FDR
GOTERM_MF_ALL	GO:0005509~calcium ion binding	3	6.52174	0.425933	MYL6, DOC2A, S100A10	37	699	17446	2.02366	1	0.998515	99.8898
GOTERM_MF_ALL	GO:0043167~ion binding	7	15.2174	0.907807	MYL6, DOC2A, ZFP579, RPP21, COL3A1, S100A10, PIN1	37	4288	17446	0.769728	1	0.999997	100
GOTERM_MF_ALL	GO:0046872~metal ion binding	6	13.0435	0.945463	MYL6, DOC2A, ZFP579, RPP21, COL3A1, S100A10	37	4068	17446	0.695448	1	1	100
GOTERM_MF_ALL	GO:0043169~cation binding	6	13.0435	0.948851	MYL6, DOC2A, ZFP579, RPP21, COL3A1, S100A10	37	4109	17446	0.688508	1	1	100
Annotation Cluster 33	Enrichment Score: 0.11334727858047257
Category	Term	Count	%	PValue	Genes	List Total	Pop Hits	Pop Total	Fold Enrichment	Bonferroni	Benjamini	FDR
GOTERM_MF_ALL	GO:1901363~heterocyclic compound binding	12	26.087	0.758357	UTP3, ZFP579, RASL10A, PNCK, HIST1H3A, HIST1H2AE, REM2, LSM4, RPLP2, RHOQ, GPATCH3, MAFK	37	6072	17446	0.931845	1	0.999993	100
GOTERM_MF_ALL	GO:0003676~nucleic acid binding	8	17.3913	0.775266	UTP3, ZFP579, HIST1H3A, HIST1H2AE, LSM4, RPLP2, GPATCH3, MAFK	37	4100	17446	0.920026	1	0.999941	100
GOTERM_MF_ALL	GO:0097159~organic cyclic compound binding	12	26.087	0.77738	UTP3, ZFP579, RASL10A, PNCK, HIST1H3A, HIST1H2AE, REM2, LSM4, RPLP2, RHOQ, GPATCH3, MAFK	37	6159	17446	0.918682	1	0.999921	100
Annotation Cluster 34	Enrichment Score: 0.09676164335490872
Category	Term	Count	%	PValue	Genes	List Total	Pop Hits	Pop Total	Fold Enrichment	Bonferroni	Benjamini	FDR
GOTERM_BP_ALL	GO:0009057~macromolecule catabolic process	3	6.52174	0.648786	OAZ2, LSM4, PIN1	40	1010	18082	1.34272	1	0.99951	100
GOTERM_BP_ALL	GO:1901575~organic substance catabolic process	3	6.52174	0.879898	OAZ2, LSM4, PIN1	40	1638	18082	0.82793	1	0.999968	100
GOTERM_BP_ALL	GO:0009056~catabolic process	3	6.52174	0.897804	OAZ2, LSM4, PIN1	40	1725	18082	0.786174	1	0.999981	100
Annotation Cluster 35	Enrichment Score: 0.07955032414032188
Category	Term	Count	%	PValue	Genes	List Total	Pop Hits	Pop Total	Fold Enrichment	Bonferroni	Benjamini	FDR
GOTERM_BP_ALL	GO:0009605~response to external stimulus	5	10.8696	0.748965	COL3A1, HIST1H3A, ROMO1, LSM4, VGF	40	2301	18082	0.98229	1	0.999789	100
GOTERM_BP_ALL	GO:0002682~regulation of immune system process	3	6.52174	0.761512	COL3A1, HIST1H3A, LSM4	40	1249	18082	1.08579	1	0.999813	100
GOTERM_BP_ALL	GO:0048583~regulation of response to stimulus	6	13.0435	0.86901	TNFRSF12A, COL3A1, HIST1H3A, LSM4, NDUFAF2, PIN1	40	3327	18082	0.815239	1	0.999964	100
GOTERM_BP_ALL	GO:0002376~immune system process	3	6.52174	0.969695	COL3A1, HIST1H3A, LSM4	40	2342	18082	0.579056	1	1	100
Annotation Cluster 36	Enrichment Score: 0.0013914247293618696
Category	Term	Count	%	PValue	Genes	List Total	Pop Hits	Pop Total	Fold Enrichment	Bonferroni	Benjamini	FDR
GOTERM_CC_ALL	GO:0044425~membrane part	12	26.087	0.99111	TMEM223, TMEM191C, IER3IP1, BAIAP2L2, NDUFA8, TNFRSF12A, CAR11, PLEKHO1, ROMO1, S100A10, RHBDL1, RHOQ	43	8380	19662	0.654782	1	1	100
GOTERM_CC_ALL	GO:0016021~integral component of membrane	7	15.2174	0.999607	TMEM223, TMEM191C, IER3IP1, TNFRSF12A, ROMO1, S100A10, RHBDL1	43	7127	19662	0.449108	1	1	100
GOTERM_CC_ALL	GO:0031224~intrinsic component of membrane	7	15.2174	0.999712	TMEM223, TMEM191C, IER3IP1, TNFRSF12A, ROMO1, S100A10, RHBDL1	43	7260	19662	0.44088	1	1	100

## Sheet: H514A down genes
DAVID GO term analysis of H514A down-regulated DE genes
Vallianatos et al., 2018
Annotation Cluster 1	Enrichment Score: 3.5352372322491217
Category	Term	Count	%	PValue	Genes	List Total	Pop Hits	Pop Total	Fold Enrichment	Bonferroni	Benjamini	FDR
GOTERM_BP_ALL	GO:0042063~gliogenesis	7	13.2075	7.20615e-05	MAG, SOX10, S100B, GSN, CSPG4, CNP, OLIG2	46	286	18082	9.62101	0.120705	0.031647	0.122181
GOTERM_BP_ALL	GO:0010001~glial cell differentiation	6	11.3208	0.00019649	MAG, SOX10, S100B, GSN, CNP, OLIG2	46	217	18082	10.8688	0.295854	0.0488751	0.33282
GOTERM_BP_ALL	GO:0048709~oligodendrocyte differentiation	4	7.54717	0.00175083	SOX10, GSN, CNP, OLIG2	46	96	18082	16.3786	0.956194	0.0810649	2.92911
Annotation Cluster 2	Enrichment Score: 3.3381987097697254
Category	Term	Count	%	PValue	Genes	List Total	Pop Hits	Pop Total	Fold Enrichment	Bonferroni	Benjamini	FDR
GOTERM_BP_ALL	GO:0048522~positive regulation of cellular process	29	54.717	5.47241e-07	CXCL1, PHLDB1, AURKAIP1, TNFRSF12A, TRA2B, COL3A1, CSPG4, OSGIN1, AFAP1L2, MYBL1, WTIP, PIN1, BAK1, EIF4EBP1, GSN, TNR, H2AFZ, VWC2, OLIG2, SOX10, MAG, NDUFA13, JUNB, PRKCQ, ARPC1B, CCND1, S100B, WRAP53, CCL27A	46	4808	18082	2.37095	0.000976348	0.000976348	0.000928381
GOTERM_BP_ALL	GO:0048518~positive regulation of biological process	30	56.6038	1.13791e-06	CXCL1, PHLDB1, AURKAIP1, TNFRSF12A, TRA2B, COL3A1, CSPG4, OSGIN1, AFAP1L2, MYBL1, WTIP, PIN1, BAK1, EIF4EBP1, GSN, TNR, H2AFZ, VWC2, OLIG2, SOX10, MAG, NDUFA13, JUNB, PRKCQ, ARPC1B, CCND1, S100B, WRAP53, HIST1H3A, CCL27A	46	5311	18082	2.22041	0.00202911	0.00101507	0.00193043
GOTERM_MF_ALL	GO:0005515~protein binding	32	60.3774	0.000406751	CXCL1, TNFRSF12A, TRA2B, COL3A1, CSPG4, OSGIN1, AFAP1L2, WTIP, PIN1, MBP, BAK1, EIF4EBP1, POLE4, GSN, TNR, PAK4, H2AFZ, OLIG2, SOX10, MAG, EFS, KRT10, JUNB, ITPR2, PRKCQ, ARPC1B, CCND1, S100B, WRAP53, HIST1H3A, CCL27A, SST	44	7972	17446	1.59157	0.095236	0.095236	0.525788
GOTERM_MF_ALL	GO:0005488~binding	40	75.4717	0.0242747	CXCL1, TNFRSF12A, TRA2B, COL3A1, CSPG4, OSGIN1, AFAP1L2, CNP, WTIP, MYBL1, PIN1, MBP, TRIM47, BAK1, EIF4EBP1, POLE4, GSN, TNR, PAK4, H2AFZ, OLIG2, SARDH, SOX10, MAG, MATN4, EFS, NDUFA13, KRT10, JUNB, ITPR2, PRKCQ, ARPC1B, CCND1, RPS16, S100B, WRAP53, HIST1H3A, CCL27A, RCN3, SST	44	13572	17446	1.16858	0.997631	0.866691	27.2712
GOTERM_BP_ALL	GO:0050896~response to stimulus	30	56.6038	0.0306021	CXCL1, TNFRSF12A, COL3A1, CSPG4, CNP, AFAP1L2, WTIP, PIN1, MBP, BAK1, EIF4EBP1, GSN, TNR, PAK4, H2AFZ, VWC2, SOX10, MAG, MATN4, NDUFA13, KRT10, JUNB, ITPR2, PRKCQ, ARPC1B, CCND1, S100B, HIST1H3A, CCL27A, SST	46	8942	18082	1.31879	1	0.343142	40.9785
GOTERM_BP_ALL	GO:0051716~cellular response to stimulus	25	47.1698	0.0496922	CXCL1, TNFRSF12A, COL3A1, CSPG4, AFAP1L2, WTIP, PIN1, BAK1, EIF4EBP1, GSN, TNR, PAK4, H2AFZ, VWC2, SOX10, MAG, NDUFA13, KRT10, JUNB, ITPR2, PRKCQ, CCND1, S100B, CCL27A, SST	46	7253	18082	1.35491	1	0.414435	57.8817
Annotation Cluster 3	Enrichment Score: 2.9741958012832073
Category	Term	Count	%	PValue	Genes	List Total	Pop Hits	Pop Total	Fold Enrichment	Bonferroni	Benjamini	FDR
GOTERM_BP_ALL	GO:0051128~regulation of cellular component organization	18	33.9623	3.17445e-05	MAG, PHLDB1, TNFRSF12A, CSPG4, NDUFA13, OSGIN1, WTIP, PIN1, ARPC1B, BAK1, PRKCQ, EIF4EBP1, S100B, GSN, TNR, WRAP53, CCL27A, TCHP	46	2399	18082	2.94938	0.0550892	0.018711	0.0538403
GOTERM_BP_ALL	GO:0071840~cellular component organization or biogenesis	27	50.9434	0.000661716	PHLDB1, TNFRSF12A, COL3A1, CSPG4, OSGIN1, CNP, WTIP, PIN1, MBP, BAK1, EIF4EBP1, POLE4, GSN, TNR, PAK4, H2AFZ, MAG, NDUFA13, KRT10, PRKCQ, ARPC1B, S100B, RPS16, WRAP53, HIST1H3A, CCL27A, TCHP	46	6037	18082	1.75805	0.693198	0.0757478	1.11668
GOTERM_BP_ALL	GO:0016043~cellular component organization	26	49.0566	0.00115605	PHLDB1, TNFRSF12A, COL3A1, CSPG4, CNP, OSGIN1, WTIP, PIN1, MBP, BAK1, EIF4EBP1, POLE4, GSN, TNR, PAK4, H2AFZ, MAG, NDUFA13, KRT10, PRKCQ, ARPC1B, S100B, WRAP53, HIST1H3A, CCL27A, TCHP	46	5872	18082	1.74051	0.873148	0.0858596	1.94322
GOTERM_BP_ALL	GO:0006996~organelle organization	15	28.3019	0.0522279	PHLDB1, NDUFA13, CNP, KRT10, WTIP, ARPC1B, BAK1, PRKCQ, POLE4, GSN, WRAP53, HIST1H3A, CCL27A, H2AFZ, TCHP	46	3620	18082	1.62881	1	0.425046	59.7481
Annotation Cluster 4	Enrichment Score: 2.558469945209192
Category	Term	Count	%	PValue	Genes	List Total	Pop Hits	Pop Total	Fold Enrichment	Bonferroni	Benjamini	FDR
GOTERM_BP_ALL	GO:0070887~cellular response to chemical stimulus	17	32.0755	0.000335277	CXCL1, PRKCQ, BAK1, CCND1, EIF4EBP1, S100B, GSN, PAK4, COL3A1, H2AFZ, CCL27A, NDUFA13, VWC2, KRT10, JUNB, PIN1, ITPR2	46	2607	18082	2.56328	0.450403	0.0581008	0.567273
GOTERM_BP_ALL	GO:1901700~response to oxygen-containing compound	13	24.5283	0.000592394	CXCL1, PRKCQ, BAK1, EIF4EBP1, CCND1, GSN, COL3A1, H2AFZ, NDUFA13, CNP, SST, JUNB, ITPR2	46	1670	18082	3.05996	0.652759	0.0727691	1.00025
GOTERM_BP_ALL	GO:0014070~response to organic cyclic compound	10	18.8679	0.000706718	BAK1, EIF4EBP1, CCND1, S100B, GSN, PAK4, H2AFZ, SST, JUNB, ITPR2	46	1005	18082	3.91131	0.716895	0.075841	1.1922
GOTERM_BP_ALL	GO:0010243~response to organonitrogen compound	9	16.9811	0.00130281	PRKCQ, EIF4EBP1, CCND1, GSN, COL3A1, H2AFZ, SST, JUNB, ITPR2	46	878	18082	4.02937	0.902416	0.0825769	2.18736
GOTERM_BP_ALL	GO:0010033~response to organic substance	17	32.0755	0.00146233	CXCL1, PRKCQ, BAK1, CCND1, EIF4EBP1, S100B, GSN, PAK4, COL3A1, H2AFZ, NDUFA13, VWC2, CNP, SST, JUNB, PIN1, ITPR2	46	2972	18082	2.24848	0.926625	0.0861374	2.45208
GOTERM_BP_ALL	GO:0009719~response to endogenous stimulus	12	22.6415	0.00158095	PRKCQ, EIF4EBP1, CCND1, S100B, GSN, COL3A1, H2AFZ, VWC2, SST, JUNB, PIN1, ITPR2	46	1608	18082	2.93348	0.940645	0.0844745	2.64847
GOTERM_BP_ALL	GO:0009628~response to abiotic stimulus	10	18.8679	0.00180443	MAG, BAK1, EIF4EBP1, CCND1, S100B, COL3A1, WTIP, SST, JUNB, ITPR2	46	1148	18082	3.4241	0.960197	0.0793375	3.01748
GOTERM_BP_ALL	GO:0042221~response to chemical	20	37.7358	0.00266292	CXCL1, COL3A1, NDUFA13, CNP, KRT10, JUNB, MBP, PIN1, ITPR2, BAK1, PRKCQ, EIF4EBP1, CCND1, S100B, GSN, PAK4, CCL27A, H2AFZ, VWC2, SST	46	4096	18082	1.91937	0.991431	0.104783	4.42283
GOTERM_BP_ALL	GO:0033993~response to lipid	9	16.9811	0.0027917	CXCL1, EIF4EBP1, CCND1, S100B, H2AFZ, NDUFA13, CNP, SST, JUNB	46	991	18082	3.56991	0.993195	0.107218	4.63199
GOTERM_BP_ALL	GO:1901698~response to nitrogen compound	9	16.9811	0.00302554	PRKCQ, EIF4EBP1, CCND1, GSN, COL3A1, H2AFZ, SST, JUNB, ITPR2	46	1004	18082	3.52369	0.995523	0.108705	5.01067
GOTERM_BP_ALL	GO:0071310~cellular response to organic substance	13	24.5283	0.0043293	CXCL1, PRKCQ, BAK1, CCND1, EIF4EBP1, PAK4, COL3A1, H2AFZ, NDUFA13, VWC2, JUNB, PIN1, ITPR2	46	2103	18082	2.42992	0.999567	0.129159	7.09617
GOTERM_BP_ALL	GO:0009725~response to hormone	7	13.2075	0.0155596	PRKCQ, EIF4EBP1, CCND1, S100B, H2AFZ, SST, JUNB	46	822	18082	3.34746	1	0.262333	23.3593
GOTERM_BP_ALL	GO:0071495~cellular response to endogenous stimulus	8	15.0943	0.0264387	PRKCQ, EIF4EBP1, COL3A1, H2AFZ, VWC2, JUNB, PIN1, ITPR2	46	1189	18082	2.64482	1	0.315857	36.5275
GOTERM_BP_ALL	GO:0051716~cellular response to stimulus	25	47.1698	0.0496922	CXCL1, TNFRSF12A, COL3A1, CSPG4, AFAP1L2, WTIP, PIN1, BAK1, EIF4EBP1, GSN, TNR, PAK4, H2AFZ, VWC2, SOX10, MAG, NDUFA13, KRT10, JUNB, ITPR2, PRKCQ, CCND1, S100B, CCL27A, SST	46	7253	18082	1.35491	1	0.414435	57.8817
Annotation Cluster 5	Enrichment Score: 2.238242221465795
Category	Term	Count	%	PValue	Genes	List Total	Pop Hits	Pop Total	Fold Enrichment	Bonferroni	Benjamini	FDR
GOTERM_CC_ALL	GO:0070161~anchoring junction	8	15.0943	0.00175466	ARPC1B, RPS16, GSN, PAK4, HIST1H3A, CSPG4, TCHP, WTIP	50	708	19662	4.44339	0.40224	0.40224	2.31123
GOTERM_CC_ALL	GO:0005925~focal adhesion	6	11.3208	0.0028182	ARPC1B, RPS16, GSN, PAK4, CSPG4, WTIP	50	391	19662	6.03437	0.562596	0.240909	3.68798
GOTERM_CC_ALL	GO:0005924~cell-substrate adherens junction	6	11.3208	0.0029763	ARPC1B, RPS16, GSN, PAK4, CSPG4, WTIP	50	396	19662	5.95818	0.582452	0.196147	3.89109
GOTERM_CC_ALL	GO:0030055~cell-substrate junction	6	11.3208	0.00314073	ARPC1B, RPS16, GSN, PAK4, CSPG4, WTIP	50	401	19662	5.88389	0.602151	0.168344	4.10193
GOTERM_CC_ALL	GO:0005912~adherens junction	7	13.2075	0.00708225	ARPC1B, RPS16, GSN, PAK4, HIST1H3A, CSPG4, WTIP	50	690	19662	3.98939	0.87538	0.257326	9.02951
GOTERM_CC_ALL	GO:0030054~cell junction	10	18.8679	0.00728228	ARPC1B, CCND1, RPS16, GSN, PAK4, HIST1H3A, CSPG4, TCHP, VWC2, WTIP	50	1407	19662	2.79488	0.882523	0.234855	9.27322
GOTERM_CC_ALL	GO:0005911~cell-cell junction	5	9.43396	0.0901561	CCND1, PAK4, HIST1H3A, TCHP, WTIP	50	684	19662	2.87456	1	0.499467	71.5784
Annotation Cluster 6	Enrichment Score: 2.003348407750253
Category	Term	Count	%	PValue	Genes	List Total	Pop Hits	Pop Total	Fold Enrichment	Bonferroni	Benjamini	FDR
GOTERM_BP_ALL	GO:0050793~regulation of developmental process	17	32.0755	7.51877e-05	CXCL1, MAG, PHLDB1, SOX10, TNFRSF12A, COL3A1, CSPG4, WTIP, H19, PIN1, CCND1, S100B, GSN, TNR, VWC2, TCHP, OLIG2	46	2299	18082	2.90669	0.125598	0.026486	0.127478
GOTERM_BP_ALL	GO:0007399~nervous system development	16	30.1887	0.00023702	MAG, SOX10, TNFRSF12A, TRA2B, COL3A1, CSPG4, CNP, MBP, PIN1, BAK1, S100B, GSN, PAK4, TNR, VWC2, OLIG2	46	2261	18082	2.78169	0.345007	0.051517	0.401341
GOTERM_BP_ALL	GO:0022008~neurogenesis	13	24.5283	0.000497112	MAG, SOX10, S100B, TNFRSF12A, GSN, TNR, PAK4, COL3A1, CSPG4, VWC2, CNP, OLIG2, PIN1	46	1638	18082	3.11974	0.588343	0.0712946	0.840004
GOTERM_BP_ALL	GO:0032502~developmental process	27	50.9434	0.000566428	CXCL1, PHLDB1, TNFRSF12A, TRA2B, COL3A1, CSPG4, CNP, WTIP, H19, PIN1, MBP, BAK1, EIF4EBP1, GSN, TNR, PAK4, H2AFZ, VWC2, OLIG2, SOX10, MAG, KRT10, JUNB, CCND1, S100B, RPS16, TCHP	46	5983	18082	1.77392	0.636276	0.0748477	0.956603
GOTERM_BP_ALL	GO:0060284~regulation of cell development	10	18.8679	0.000711783	MAG, PHLDB1, SOX10, TNFRSF12A, TNR, COL3A1, CSPG4, VWC2, OLIG2, PIN1	46	1006	18082	3.90743	0.719445	0.0720374	1.20069
GOTERM_BP_ALL	GO:0044707~single-multicellular organism process	27	50.9434	0.000937218	CXCL1, PHLDB1, TNFRSF12A, TRA2B, COL3A1, CSPG4, CNP, AFAP1L2, H19, PIN1, MBP, BAK1, EIF4EBP1, GSN, TNR, PAK4, H2AFZ, VWC2, OLIG2, SOX10, MAG, KRT10, JUNB, PRKCQ, CCND1, S100B, RPS16	46	6161	18082	1.72267	0.812452	0.0887922	1.57814
GOTERM_BP_ALL	GO:0048856~anatomical structure development	26	49.0566	0.000943193	CXCL1, PHLDB1, TNFRSF12A, TRA2B, COL3A1, CSPG4, CNP, WTIP, PIN1, MBP, BAK1, EIF4EBP1, GSN, TNR, PAK4, H2AFZ, VWC2, OLIG2, SOX10, MAG, KRT10, JUNB, CCND1, S100B, RPS16, TCHP	46	5799	18082	1.76242	0.814443	0.0848363	1.58812
GOTERM_BP_ALL	GO:0051093~negative regulation of developmental process	9	16.9811	0.00101823	MAG, CCND1, S100B, TNR, COL3A1, CSPG4, TCHP, OLIG2, H19	46	845	18082	4.18672	0.837726	0.0829505	1.71344
GOTERM_BP_ALL	GO:0045595~regulation of cell differentiation	13	24.5283	0.00116643	MAG, PHLDB1, SOX10, CCND1, S100B, TNFRSF12A, TNR, COL3A1, CSPG4, VWC2, OLIG2, JUNB, PIN1	46	1802	18082	2.83581	0.875481	0.0831431	1.96051
GOTERM_BP_ALL	GO:0044767~single-organism developmental process	26	49.0566	0.00117855	CXCL1, PHLDB1, TNFRSF12A, TRA2B, COL3A1, CSPG4, CNP, H19, PIN1, MBP, BAK1, EIF4EBP1, GSN, TNR, PAK4, H2AFZ, VWC2, OLIG2, SOX10, MAG, KRT10, JUNB, CCND1, S100B, RPS16, TCHP	46	5879	18082	1.73844	0.878148	0.0807508	1.98069
GOTERM_BP_ALL	GO:0007275~multicellular organism development	24	45.283	0.00127133	CXCL1, MAG, SOX10, PHLDB1, TNFRSF12A, TRA2B, COL3A1, CSPG4, CNP, KRT10, JUNB, MBP, PIN1, BAK1, EIF4EBP1, CCND1, S100B, RPS16, GSN, TNR, PAK4, H2AFZ, VWC2, OLIG2	46	5195	18082	1.81599	0.896767	0.0836321	2.13504
GOTERM_BP_ALL	GO:0051240~positive regulation of multicellular organismal process	12	22.6415	0.00148781	CXCL1, MAG, PHLDB1, PRKCQ, SOX10, CCND1, TNFRSF12A, TNR, VWC2, AFAP1L2, OLIG2, PIN1	46	1596	18082	2.95554	0.929891	0.0821604	2.49428
GOTERM_BP_ALL	GO:0048731~system development	22	41.5094	0.00170348	CXCL1, MAG, SOX10, TNFRSF12A, TRA2B, COL3A1, CSPG4, CNP, KRT10, JUNB, MBP, PIN1, BAK1, EIF4EBP1, CCND1, S100B, RPS16, GSN, TNR, PAK4, VWC2, OLIG2	46	4610	18082	1.8759	0.952323	0.08562	2.85096
GOTERM_BP_ALL	GO:2000026~regulation of multicellular organismal development	13	24.5283	0.00174935	CXCL1, MAG, PHLDB1, SOX10, CCND1, S100B, TNFRSF12A, TNR, COL3A1, CSPG4, VWC2, OLIG2, PIN1	46	1888	18082	2.70664	0.956078	0.0831531	2.92667
GOTERM_BP_ALL	GO:0051239~regulation of multicellular organismal process	16	30.1887	0.00233726	CXCL1, MAG, PHLDB1, SOX10, TNFRSF12A, COL3A1, CSPG4, AFAP1L2, PIN1, H19, PRKCQ, CCND1, S100B, TNR, VWC2, OLIG2	46	2804	18082	2.24301	0.984654	0.0946648	3.89201
GOTERM_BP_ALL	GO:0048468~cell development	14	26.4151	0.00285506	MAG, PHLDB1, SOX10, TNFRSF12A, COL3A1, CSPG4, CNP, KRT10, PIN1, GSN, PAK4, TNR, VWC2, OLIG2	46	2278	18082	2.41581	0.993925	0.107218	4.73473
GOTERM_BP_ALL	GO:0048699~generation of neurons	11	20.7547	0.00367334	MAG, SOX10, TNFRSF12A, TNR, PAK4, COL3A1, CSPG4, VWC2, CNP, OLIG2, PIN1	46	1526	18082	2.83352	0.998597	0.118673	6.05234
GOTERM_BP_ALL	GO:0050767~regulation of neurogenesis	8	15.0943	0.00397586	MAG, SOX10, TNFRSF12A, TNR, COL3A1, CSPG4, VWC2, OLIG2	46	824	18082	3.81638	0.999184	0.123384	6.53511
GOTERM_BP_ALL	GO:0010646~regulation of cell communication	15	28.3019	0.0060997	SOX10, PRKCQ, BAK1, CCND1, S100B, TNFRSF12A, GSN, TNR, COL3A1, CSPG4, NDUFA13, VWC2, AFAP1L2, WTIP, PIN1	46	2785	18082	2.11716	0.999982	0.168985	9.85921
GOTERM_BP_ALL	GO:0050768~negative regulation of neurogenesis	5	9.43396	0.00633432	MAG, TNR, COL3A1, CSPG4, OLIG2	46	298	18082	6.59542	0.999988	0.172251	10.2195
GOTERM_BP_ALL	GO:0023051~regulation of signaling	15	28.3019	0.00656728	SOX10, PRKCQ, BAK1, CCND1, S100B, TNFRSF12A, GSN, TNR, COL3A1, CSPG4, NDUFA13, VWC2, AFAP1L2, WTIP, PIN1	46	2808	18082	2.09982	0.999992	0.175359	10.5759
GOTERM_BP_ALL	GO:0051960~regulation of nervous system development	8	15.0943	0.00729396	MAG, SOX10, TNFRSF12A, TNR, COL3A1, CSPG4, VWC2, OLIG2	46	922	18082	3.41073	0.999998	0.187321	11.6792
GOTERM_BP_ALL	GO:0048869~cellular developmental process	20	37.7358	0.00732878	MAG, PHLDB1, SOX10, TNFRSF12A, COL3A1, CSPG4, CNP, KRT10, MYBL1, JUNB, PIN1, BAK1, CCND1, S100B, GSN, TNR, PAK4, TCHP, VWC2, OLIG2	46	4465	18082	1.76075	0.999998	0.18548	11.7317
GOTERM_BP_ALL	GO:0030154~cell differentiation	19	35.8491	0.00763861	MAG, PHLDB1, SOX10, TNFRSF12A, COL3A1, CSPG4, CNP, KRT10, MYBL1, JUNB, PIN1, BAK1, CCND1, S100B, GSN, TNR, PAK4, VWC2, OLIG2	46	4143	18082	1.80272	0.999999	0.187291	12.1979
GOTERM_BP_ALL	GO:0051961~negative regulation of nervous system development	5	9.43396	0.00810743	MAG, TNR, COL3A1, CSPG4, OLIG2	46	320	18082	6.14198	1	0.194971	12.899
GOTERM_BP_ALL	GO:0031345~negative regulation of cell projection organization	4	7.54717	0.0102853	MAG, TNR, CSPG4, TCHP	46	181	18082	8.687	1	0.215588	16.0873
GOTERM_BP_ALL	GO:0051094~positive regulation of developmental process	9	16.9811	0.0112044	CXCL1, MAG, PHLDB1, SOX10, CCND1, TNFRSF12A, VWC2, OLIG2, PIN1	46	1252	18082	2.8257	1	0.222296	17.3994
GOTERM_BP_ALL	GO:0014015~positive regulation of gliogenesis	3	5.66038	0.0117419	MAG, SOX10, OLIG2	46	66	18082	17.8676	1	0.22672	18.1579
GOTERM_BP_ALL	GO:0010721~negative regulation of cell development	5	9.43396	0.0122268	MAG, TNR, COL3A1, CSPG4, OLIG2	46	361	18082	5.44442	1	0.232465	18.8365
GOTERM_BP_ALL	GO:0045596~negative regulation of cell differentiation	7	13.2075	0.0123379	MAG, CCND1, S100B, TNR, COL3A1, CSPG4, OLIG2	46	781	18082	3.52319	1	0.231882	18.9913
GOTERM_BP_ALL	GO:0010720~positive regulation of cell development	6	11.3208	0.0156649	MAG, SOX10, TNFRSF12A, VWC2, OLIG2, PIN1	46	595	18082	3.9639	1	0.259049	23.4982
GOTERM_BP_ALL	GO:0030182~neuron differentiation	9	16.9811	0.0191831	MAG, TNFRSF12A, TNR, PAK4, CSPG4, VWC2, CNP, OLIG2, PIN1	46	1379	18082	2.56547	1	0.28056	28.007
GOTERM_BP_ALL	GO:0045665~negative regulation of neuron differentiation	4	7.54717	0.0194713	MAG, TNR, CSPG4, OLIG2	46	230	18082	6.83629	1	0.279658	28.365
GOTERM_BP_ALL	GO:0048513~animal organ development	16	30.1887	0.0197358	CXCL1, SOX10, TRA2B, COL3A1, CNP, KRT10, JUNB, MBP, PIN1, BAK1, EIF4EBP1, CCND1, S100B, RPS16, TNR, OLIG2	46	3520	18082	1.78676	1	0.280681	28.692
GOTERM_BP_ALL	GO:0030030~cell projection organization	9	16.9811	0.0201859	MAG, PRKCQ, TNFRSF12A, GSN, TNR, PAK4, CSPG4, TCHP, CNP	46	1392	18082	2.54151	1	0.279588	29.2455
GOTERM_BP_ALL	GO:0031344~regulation of cell projection organization	6	11.3208	0.0236691	MAG, PRKCQ, TNFRSF12A, TNR, CSPG4, TCHP	46	662	18082	3.56272	1	0.303961	33.3937
GOTERM_BP_ALL	GO:0051129~negative regulation of cellular component organization	6	11.3208	0.0254816	MAG, EIF4EBP1, GSN, TNR, CSPG4, TCHP	46	675	18082	3.49411	1	0.312427	35.4607
GOTERM_BP_ALL	GO:0045664~regulation of neuron differentiation	6	11.3208	0.0263478	MAG, TNFRSF12A, TNR, CSPG4, VWC2, OLIG2	46	681	18082	3.46332	1	0.317021	36.4269
GOTERM_BP_ALL	GO:0050769~positive regulation of neurogenesis	5	9.43396	0.0331078	MAG, SOX10, TNFRSF12A, VWC2, OLIG2	46	490	18082	4.01109	1	0.357184	43.514
GOTERM_BP_ALL	GO:0045597~positive regulation of cell differentiation	7	13.2075	0.033596	MAG, SOX10, TNFRSF12A, VWC2, OLIG2, JUNB, PIN1	46	981	18082	2.8049	1	0.359337	43.9959
GOTERM_BP_ALL	GO:0014013~regulation of gliogenesis	3	5.66038	0.0364674	MAG, SOX10, OLIG2	46	121	18082	9.74596	1	0.369027	46.7528
GOTERM_CC_ALL	GO:0044420~extracellular matrix component	3	5.66038	0.0440235	TNR, COL3A1, VWC2	50	134	19662	8.80388	0.999998	0.375699	45.0894
GOTERM_BP_ALL	GO:0051962~positive regulation of nervous system development	5	9.43396	0.0496843	MAG, SOX10, TNFRSF12A, VWC2, OLIG2	46	559	18082	3.51598	1	0.416235	57.8757
GOTERM_BP_ALL	GO:0032501~multicellular organismal process	27	50.9434	0.053494	CXCL1, PHLDB1, TNFRSF12A, TRA2B, COL3A1, CSPG4, CNP, AFAP1L2, H19, PIN1, MBP, BAK1, EIF4EBP1, GSN, TNR, PAK4, H2AFZ, VWC2, OLIG2, SOX10, MAG, KRT10, JUNB, PRKCQ, CCND1, S100B, RPS16	46	8084	18082	1.31288	1	0.429234	60.6507
GOTERM_BP_ALL	GO:0010977~negative regulation of neuron projection development	3	5.66038	0.0549368	MAG, TNR, CSPG4	46	152	18082	7.7583	1	0.434375	61.656
GOTERM_BP_ALL	GO:0051241~negative regulation of multicellular organismal process	7	13.2075	0.065494	MAG, S100B, TNR, COL3A1, CSPG4, OLIG2, H19	46	1157	18082	2.37823	1	0.469026	68.3094
GOTERM_BP_ALL	GO:0031175~neuron projection development	6	11.3208	0.0773469	MAG, TNFRSF12A, TNR, PAK4, CSPG4, CNP	46	921	18082	2.56083	1	0.503889	74.4799
GOTERM_BP_ALL	GO:0048666~neuron development	6	11.3208	0.133359	MAG, TNFRSF12A, TNR, PAK4, CSPG4, CNP	46	1092	18082	2.15982	1	0.629949	91.1803
GOTERM_BP_ALL	GO:0010975~regulation of neuron projection development	4	7.54717	0.134935	MAG, TNFRSF12A, TNR, CSPG4	46	513	18082	3.06501	1	0.633169	91.4485
GOTERM_CC_ALL	GO:0031012~extracellular matrix	4	7.54717	0.139534	RPS16, TNR, COL3A1, VWC2	50	520	19662	3.02492	1	0.640847	86.4796
GOTERM_BP_ALL	GO:0031589~cell-substrate adhesion	3	5.66038	0.168616	TNFRSF12A, COL3A1, VWC2	46	297	18082	3.97058	1	0.685439	95.6404
GOTERM_CC_ALL	GO:0005578~proteinaceous extracellular matrix	3	5.66038	0.226063	TNR, COL3A1, VWC2	50	360	19662	3.277	1	0.770594	96.7029
GOTERM_CC_ALL	GO:0044463~cell projection part	4	7.54717	0.514952	MAG, CSPG4, TCHP, MBP	50	1089	19662	1.44441	1	0.931669	99.9934
GOTERM_CC_ALL	GO:0009986~cell surface	3	5.66038	0.656954	TNFRSF12A, TNR, CSPG4	50	890	19662	1.32553	1	0.974977	99.9999
Annotation Cluster 7	Enrichment Score: 1.9521937510560774
Category	Term	Count	%	PValue	Genes	List Total	Pop Hits	Pop Total	Fold Enrichment	Bonferroni	Benjamini	FDR
GOTERM_BP_ALL	GO:0007417~central nervous system development	11	20.7547	0.000106959	MAG, SOX10, BAK1, S100B, GSN, TRA2B, TNR, COL3A1, CNP, OLIG2, MBP	46	969	18082	4.46229	0.173811	0.031321	0.181299
GOTERM_BP_ALL	GO:0007420~brain development	7	13.2075	0.00992758	BAK1, TRA2B, TNR, COL3A1, CNP, OLIG2, MBP	46	745	18082	3.69343	1	0.213896	15.5712
GOTERM_BP_ALL	GO:0060322~head development	7	13.2075	0.0130754	BAK1, TRA2B, TNR, COL3A1, CNP, OLIG2, MBP	46	791	18082	3.47865	1	0.239044	20.0113
GOTERM_BP_ALL	GO:0030900~forebrain development	5	9.43396	0.0191245	TRA2B, TNR, COL3A1, CNP, OLIG2	46	413	18082	4.75892	1	0.282098	27.9339
GOTERM_BP_ALL	GO:0009636~response to toxic substance	3	5.66038	0.0511445	BAK1, CNP, MBP	46	146	18082	8.07713	1	0.421903	58.9604
GOTERM_BP_ALL	GO:0021537~telencephalon development	3	5.66038	0.142538	TRA2B, TNR, COL3A1	46	267	18082	4.41671	1	0.643684	92.638
Annotation Cluster 8	Enrichment Score: 1.7724636871427146
Category	Term	Count	%	PValue	Genes	List Total	Pop Hits	Pop Total	Fold Enrichment	Bonferroni	Benjamini	FDR
GOTERM_BP_ALL	GO:0045471~response to ethanol	5	9.43396	0.000423037	BAK1, EIF4EBP1, CCND1, GSN, ITPR2	46	142	18082	13.8411	0.530121	0.0663577	0.715257
GOTERM_BP_ALL	GO:0097305~response to alcohol	5	9.43396	0.00102904	BAK1, EIF4EBP1, CCND1, GSN, ITPR2	46	180	18082	10.9191	0.84083	0.0801416	1.73148
GOTERM_BP_ALL	GO:0031099~regeneration	5	9.43396	0.00138309	BAK1, CCND1, RPS16, GSN, TNR	46	195	18082	10.0792	0.91546	0.0844526	2.32067
GOTERM_BP_ALL	GO:0031100~organ regeneration	3	5.66038	0.0181382	BAK1, CCND1, RPS16	46	83	18082	14.208	1	0.276391	26.6947
GOTERM_BP_ALL	GO:0031667~response to nutrient levels	3	5.66038	0.290335	EIF4EBP1, CCND1, GSN	46	430	18082	2.74247	1	0.833043	99.7027
GOTERM_BP_ALL	GO:0009991~response to extracellular stimulus	3	5.66038	0.319894	EIF4EBP1, CCND1, GSN	46	462	18082	2.55251	1	0.857637	99.8556
GOTERM_CC_ALL	GO:0005829~cytosol	7	13.2075	0.386005	BAK1, EIF4EBP1, CCND1, RPS16, GSN, WTIP, PIN1	50	2011	19662	1.36881	1	0.873972	99.8488
Annotation Cluster 9	Enrichment Score: 1.684607032473917
Category	Term	Count	%	PValue	Genes	List Total	Pop Hits	Pop Total	Fold Enrichment	Bonferroni	Benjamini	FDR
GOTERM_BP_ALL	GO:0009628~response to abiotic stimulus	10	18.8679	0.00180443	MAG, BAK1, EIF4EBP1, CCND1, S100B, COL3A1, WTIP, SST, JUNB, ITPR2	46	1148	18082	3.4241	0.960197	0.0793375	3.01748
GOTERM_BP_ALL	GO:0001666~response to hypoxia	4	7.54717	0.0381409	EIF4EBP1, S100B, WTIP, ITPR2	46	299	18082	5.25869	1	0.37438	48.3002
GOTERM_BP_ALL	GO:0036293~response to decreased oxygen levels	4	7.54717	0.0410686	EIF4EBP1, S100B, WTIP, ITPR2	46	308	18082	5.10503	1	0.383032	50.906
GOTERM_BP_ALL	GO:0070482~response to oxygen levels	4	7.54717	0.0646148	EIF4EBP1, S100B, WTIP, ITPR2	46	371	18082	4.23813	1	0.466096	67.7998
Annotation Cluster 10	Enrichment Score: 1.58837255505386
Category	Term	Count	%	PValue	Genes	List Total	Pop Hits	Pop Total	Fold Enrichment	Bonferroni	Benjamini	FDR
GOTERM_BP_ALL	GO:0048870~cell motility	11	20.7547	0.00147	CXCL1, PRKCQ, SOX10, TNFRSF12A, GSN, TNR, COL3A1, CSPG4, CCL27A, SST, PIN1	46	1348	18082	3.20768	0.927624	0.0838078	2.46478
GOTERM_BP_ALL	GO:0051674~localization of cell	11	20.7547	0.00147	CXCL1, PRKCQ, SOX10, TNFRSF12A, GSN, TNR, COL3A1, CSPG4, CCL27A, SST, PIN1	46	1348	18082	3.20768	0.927624	0.0838078	2.46478
GOTERM_BP_ALL	GO:0048583~regulation of response to stimulus	18	33.9623	0.00175466	CXCL1, SOX10, TNFRSF12A, COL3A1, CSPG4, NDUFA13, AFAP1L2, WTIP, PIN1, BAK1, PRKCQ, CCND1, S100B, GSN, TNR, HIST1H3A, CCL27A, VWC2	46	3327	18082	2.12671	0.956492	0.0791842	2.93542
GOTERM_BP_ALL	GO:0007166~cell surface receptor signaling pathway	14	26.4151	0.00285506	CXCL1, SOX10, PRKCQ, BAK1, CCND1, EIF4EBP1, TNFRSF12A, COL3A1, CSPG4, NDUFA13, VWC2, AFAP1L2, SST, PIN1	46	2278	18082	2.41581	0.993925	0.107218	4.73473
GOTERM_BP_ALL	GO:0040011~locomotion	11	20.7547	0.00372569	CXCL1, PRKCQ, SOX10, TNFRSF12A, GSN, TNR, COL3A1, CSPG4, CCL27A, SST, PIN1	46	1529	18082	2.82796	0.998722	0.118132	6.13605
GOTERM_BP_ALL	GO:0009966~regulation of signal transduction	14	26.4151	0.00574718	SOX10, PRKCQ, BAK1, CCND1, S100B, TNFRSF12A, GSN, COL3A1, CSPG4, NDUFA13, VWC2, AFAP1L2, WTIP, PIN1	46	2468	18082	2.22983	0.999966	0.165144	9.31527
GOTERM_BP_ALL	GO:0010646~regulation of cell communication	15	28.3019	0.0060997	SOX10, PRKCQ, BAK1, CCND1, S100B, TNFRSF12A, GSN, TNR, COL3A1, CSPG4, NDUFA13, VWC2, AFAP1L2, WTIP, PIN1	46	2785	18082	2.11716	0.999982	0.168985	9.85921
GOTERM_BP_ALL	GO:0023051~regulation of signaling	15	28.3019	0.00656728	SOX10, PRKCQ, BAK1, CCND1, S100B, TNFRSF12A, GSN, TNR, COL3A1, CSPG4, NDUFA13, VWC2, AFAP1L2, WTIP, PIN1	46	2808	18082	2.09982	0.999992	0.175359	10.5759
GOTERM_BP_ALL	GO:0006950~response to stress	17	32.0755	0.00836068	CXCL1, MATN4, TNFRSF12A, COL3A1, CSPG4, AFAP1L2, WTIP, ITPR2, BAK1, PRKCQ, EIF4EBP1, CCND1, S100B, GSN, TNR, HIST1H3A, SST	46	3518	18082	1.89951	1	0.197795	13.2755
GOTERM_BP_ALL	GO:0006928~movement of cell or subcellular component	11	20.7547	0.00864926	CXCL1, PRKCQ, SOX10, TNFRSF12A, GSN, TNR, COL3A1, CSPG4, CCL27A, SST, PIN1	46	1724	18082	2.5081	1	0.201265	13.7027
GOTERM_BP_ALL	GO:0016477~cell migration	9	16.9811	0.00874257	CXCL1, PRKCQ, SOX10, TNFRSF12A, GSN, TNR, COL3A1, CSPG4, CCL27A	46	1199	18082	2.95061	1	0.200617	13.8404
GOTERM_BP_ALL	GO:0010647~positive regulation of cell communication	10	18.8679	0.0100601	PRKCQ, BAK1, S100B, TNFRSF12A, GSN, TNR, COL3A1, CSPG4, AFAP1L2, PIN1	46	1490	18082	2.63817	1	0.213877	15.7627
GOTERM_BP_ALL	GO:0023056~positive regulation of signaling	10	18.8679	0.0103586	PRKCQ, BAK1, S100B, TNFRSF12A, GSN, TNR, COL3A1, CSPG4, AFAP1L2, PIN1	46	1497	18082	2.62583	1	0.21446	16.1926
GOTERM_BP_ALL	GO:0048584~positive regulation of response to stimulus	11	20.7547	0.0131042	CXCL1, PRKCQ, BAK1, S100B, TNFRSF12A, GSN, COL3A1, CSPG4, CCL27A, AFAP1L2, PIN1	46	1834	18082	2.35766	1	0.237109	20.0509
GOTERM_BP_ALL	GO:0009967~positive regulation of signal transduction	9	16.9811	0.0155972	PRKCQ, BAK1, S100B, TNFRSF12A, GSN, COL3A1, CSPG4, AFAP1L2, PIN1	46	1328	18082	2.66399	1	0.260458	23.4089
GOTERM_BP_ALL	GO:0007167~enzyme linked receptor protein signaling pathway	7	13.2075	0.0157305	PRKCQ, EIF4EBP1, COL3A1, CSPG4, VWC2, AFAP1L2, PIN1	46	824	18082	3.33933	1	0.257637	23.5846
GOTERM_BP_ALL	GO:0042981~regulation of apoptotic process	9	16.9811	0.0281938	PRKCQ, SOX10, BAK1, S100B, TNFRSF12A, GSN, NDUFA13, OSGIN1, PIN1	46	1482	18082	2.38717	1	0.330993	38.441
GOTERM_BP_ALL	GO:0043067~regulation of programmed cell death	9	16.9811	0.0298229	PRKCQ, SOX10, BAK1, S100B, TNFRSF12A, GSN, NDUFA13, OSGIN1, PIN1	46	1498	18082	2.36167	1	0.340136	40.1685
GOTERM_BP_ALL	GO:0050896~response to stimulus	30	56.6038	0.0306021	CXCL1, TNFRSF12A, COL3A1, CSPG4, CNP, AFAP1L2, WTIP, PIN1, MBP, BAK1, EIF4EBP1, GSN, TNR, PAK4, H2AFZ, VWC2, SOX10, MAG, MATN4, NDUFA13, KRT10, JUNB, ITPR2, PRKCQ, ARPC1B, CCND1, S100B, HIST1H3A, CCL27A, SST	46	8942	18082	1.31879	1	0.343142	40.9785
GOTERM_BP_ALL	GO:0051716~cellular response to stimulus	25	47.1698	0.0496922	CXCL1, TNFRSF12A, COL3A1, CSPG4, AFAP1L2, WTIP, PIN1, BAK1, EIF4EBP1, GSN, TNR, PAK4, H2AFZ, VWC2, SOX10, MAG, NDUFA13, KRT10, JUNB, ITPR2, PRKCQ, CCND1, S100B, CCL27A, SST	46	7253	18082	1.35491	1	0.414435	57.8817
GOTERM_BP_ALL	GO:0080134~regulation of response to stress	7	13.2075	0.0732206	CXCL1, PRKCQ, BAK1, TNFRSF12A, GSN, TNR, HIST1H3A	46	1191	18082	2.31033	1	0.492701	72.473
GOTERM_BP_ALL	GO:0051246~regulation of protein metabolic process	11	20.7547	0.0808718	PRKCQ, BAK1, EIF4EBP1, CCND1, S100B, AURKAIP1, GSN, CSPG4, NDUFA13, WTIP, PIN1	46	2483	18082	1.74142	1	0.511689	76.0844
GOTERM_BP_ALL	GO:0065008~regulation of biological quality	13	24.5283	0.12437	CXCL1, PRKCQ, BAK1, ARPC1B, CCND1, S100B, TNFRSF12A, GSN, TNR, WRAP53, DPM3, CNP, PIN1	46	3398	18082	1.50386	1	0.614065	89.4931
GOTERM_BP_ALL	GO:0035556~intracellular signal transduction	10	18.8679	0.129496	PRKCQ, BAK1, EIF4EBP1, S100B, GSN, COL3A1, CSPG4, NDUFA13, WTIP, PIN1	46	2380	18082	1.65163	1	0.621212	90.4891
GOTERM_BP_ALL	GO:1902531~regulation of intracellular signal transduction	7	13.2075	0.18557	PRKCQ, S100B, COL3A1, CSPG4, NDUFA13, WTIP, PIN1	46	1552	18082	1.77294	1	0.716095	96.9264
GOTERM_BP_ALL	GO:0051179~localization	18	33.9623	0.207547	CXCL1, SOX10, TNFRSF12A, COL3A1, CSPG4, NDUFA13, CNP, ITPR2, PIN1, BAK1, PRKCQ, CCND1, TMED3, GSN, TNR, WRAP53, CCL27A, SST	46	5623	18082	1.25833	1	0.745994	98.0676
GOTERM_BP_ALL	GO:0044700~single organism signaling	18	33.9623	0.344371	CXCL1, SOX10, TNFRSF12A, COL3A1, CSPG4, NDUFA13, AFAP1L2, WTIP, PIN1, BAK1, PRKCQ, EIF4EBP1, CCND1, S100B, GSN, TNR, VWC2, SST	46	6137	18082	1.15294	1	0.878142	99.9224
GOTERM_BP_ALL	GO:0007165~signal transduction	17	32.0755	0.349381	CXCL1, SOX10, TNFRSF12A, COL3A1, CSPG4, NDUFA13, AFAP1L2, WTIP, PIN1, BAK1, PRKCQ, EIF4EBP1, CCND1, S100B, GSN, VWC2, SST	46	5763	18082	1.15955	1	0.880608	99.9319
GOTERM_BP_ALL	GO:0023052~signaling	18	33.9623	0.354355	CXCL1, SOX10, TNFRSF12A, COL3A1, CSPG4, NDUFA13, AFAP1L2, WTIP, PIN1, BAK1, PRKCQ, EIF4EBP1, CCND1, S100B, GSN, TNR, VWC2, SST	46	6171	18082	1.14658	1	0.883675	99.9402
GOTERM_BP_ALL	GO:0007154~cell communication	18	33.9623	0.372172	CXCL1, SOX10, TNFRSF12A, COL3A1, CSPG4, NDUFA13, AFAP1L2, WTIP, PIN1, BAK1, PRKCQ, EIF4EBP1, CCND1, S100B, GSN, TNR, VWC2, SST	46	6231	18082	1.13554	1	0.895427	99.9628
GOTERM_BP_ALL	GO:1902533~positive regulation of intracellular signal transduction	4	7.54717	0.393023	PRKCQ, S100B, COL3A1, CSPG4	46	905	18082	1.7374	1	0.907125	99.979
Annotation Cluster 11	Enrichment Score: 1.4624862534982013
Category	Term	Count	%	PValue	Genes	List Total	Pop Hits	Pop Total	Fold Enrichment	Bonferroni	Benjamini	FDR
GOTERM_BP_ALL	GO:0042552~myelination	3	5.66038	0.0337656	MAG, OLIG2, MBP	46	116	18082	10.166	1	0.358723	44.1624
GOTERM_BP_ALL	GO:0008366~axon ensheathment	3	5.66038	0.0348364	MAG, OLIG2, MBP	46	118	18082	9.99374	1	0.361657	45.203
GOTERM_BP_ALL	GO:0007272~ensheathment of neurons	3	5.66038	0.0348364	MAG, OLIG2, MBP	46	118	18082	9.99374	1	0.361657	45.203
Annotation Cluster 12	Enrichment Score: 1.3007853998886982
Category	Term	Count	%	PValue	Genes	List Total	Pop Hits	Pop Total	Fold Enrichment	Bonferroni	Benjamini	FDR
GOTERM_CC_ALL	GO:0044446~intracellular organelle part	28	52.8302	0.0112839	AURKAIP1, TRA2B, RABEPK, CNP, MYBL1, PIN1, BAK1, EIF4EBP1, POLE4, TMED3, GSN, TNR, H2AFZ, SARDH, CCDC106, SOX10, NDUFA13, KRT10, JUNB, ITPR2, ARPC1B, CCND1, RPS16, WRAP53, HIST1H3A, TCHP, DPM3, RCN3	50	7483	19662	1.47143	0.964027	0.225678	14.0237
GOTERM_CC_ALL	GO:0005737~cytoplasm	35	66.0377	0.0147847	PHLDB1, AURKAIP1, TRA2B, RABEPK, ECHDC2, CNP, AFAP1L2, WTIP, H19, PIN1, MBP, TRIM47, BAK1, EIF4EBP1, GSN, TMED3, TNR, PAK4, OLIG2, SARDH, CCDC106, SOX10, MAG, NDUFA13, KRT10, ITPR2, PRKCQ, ARPC1B, CCND1, S100B, RPS16, WRAP53, TCHP, DPM3, RCN3	50	10431	19662	1.31947	0.987276	0.252447	17.9897
GOTERM_CC_ALL	GO:0044422~organelle part	28	52.8302	0.0160577	AURKAIP1, TRA2B, RABEPK, CNP, MYBL1, PIN1, BAK1, EIF4EBP1, POLE4, TMED3, GSN, TNR, H2AFZ, SARDH, CCDC106, SOX10, NDUFA13, KRT10, JUNB, ITPR2, ARPC1B, CCND1, RPS16, WRAP53, HIST1H3A, TCHP, DPM3, RCN3	50	7667	19662	1.43612	0.991288	0.256542	19.3895
GOTERM_CC_ALL	GO:0044424~intracellular part	41	77.3585	0.0301301	PHLDB1, AURKAIP1, TRA2B, RABEPK, ECHDC2, AFAP1L2, CNP, WTIP, MYBL1, H19, PIN1, MBP, TRIM47, BAK1, EIF4EBP1, POLE4, GSN, TMED3, TNR, PAK4, H2AFZ, OLIG2, SARDH, CCDC106, SOX10, MAG, NDUFA13, KRT10, JUNB, ITPR2, PRKCQ, ARPC1B, CCND1, RPS16, S100B, WRAP53, HIST1H3A, CCL27A, TCHP, DPM3, RCN3	50	13479	19662	1.19615	0.999872	0.347438	33.4587
GOTERM_CC_ALL	GO:0043227~membrane-bounded organelle	37	69.8113	0.0330794	AURKAIP1, TRA2B, CSPG4, RABEPK, ECHDC2, CNP, WTIP, MYBL1, PIN1, MBP, TRIM47, BAK1, EIF4EBP1, POLE4, GSN, TMED3, TNR, H2AFZ, OLIG2, SARDH, CCDC106, SOX10, NDUFA13, KRT10, JUNB, ITPR2, PRKCQ, ARPC1B, CCND1, RPS16, S100B, WRAP53, HIST1H3A, CCL27A, TCHP, DPM3, RCN3	50	11760	19662	1.23723	0.999948	0.361101	36.1031
GOTERM_CC_ALL	GO:0005622~intracellular	42	79.2453	0.0359376	PHLDB1, AURKAIP1, TRA2B, CSPG4, RABEPK, ECHDC2, AFAP1L2, CNP, WTIP, MYBL1, H19, PIN1, MBP, TRIM47, BAK1, POLE4, EIF4EBP1, GSN, TMED3, TNR, PAK4, H2AFZ, OLIG2, SARDH, CCDC106, SOX10, MAG, NDUFA13, KRT10, JUNB, ITPR2, PRKCQ, ARPC1B, CCND1, RPS16, S100B, WRAP53, HIST1H3A, CCL27A, TCHP, DPM3, RCN3	50	14047	19662	1.17577	0.999978	0.372645	38.5727
GOTERM_CC_ALL	GO:0043231~intracellular membrane-bounded organelle	34	64.1509	0.0408068	AURKAIP1, TRA2B, RABEPK, ECHDC2, CNP, WTIP, MYBL1, PIN1, MBP, TRIM47, BAK1, EIF4EBP1, POLE4, GSN, TMED3, TNR, H2AFZ, OLIG2, SARDH, CCDC106, SOX10, NDUFA13, KRT10, JUNB, ITPR2, PRKCQ, CCND1, S100B, WRAP53, HIST1H3A, CCL27A, TCHP, DPM3, RCN3	50	10626	19662	1.25825	0.999995	0.386324	42.5776
GOTERM_CC_ALL	GO:0043229~intracellular organelle	36	67.9245	0.0606324	AURKAIP1, TRA2B, RABEPK, ECHDC2, CNP, WTIP, MYBL1, PIN1, MBP, TRIM47, BAK1, EIF4EBP1, POLE4, GSN, TMED3, TNR, H2AFZ, OLIG2, SARDH, CCDC106, SOX10, NDUFA13, KRT10, JUNB, ITPR2, PRKCQ, ARPC1B, CCND1, RPS16, S100B, WRAP53, HIST1H3A, CCL27A, TCHP, DPM3, RCN3	50	11735	19662	1.20636	1	0.457132	56.5181
GOTERM_CC_ALL	GO:0043226~organelle	37	69.8113	0.134062	AURKAIP1, TRA2B, CSPG4, RABEPK, ECHDC2, CNP, WTIP, MYBL1, PIN1, MBP, TRIM47, BAK1, EIF4EBP1, POLE4, GSN, TMED3, TNR, H2AFZ, OLIG2, SARDH, CCDC106, SOX10, NDUFA13, KRT10, JUNB, ITPR2, PRKCQ, ARPC1B, CCND1, RPS16, S100B, WRAP53, HIST1H3A, CCL27A, TCHP, DPM3, RCN3	50	12768	19662	1.13956	1	0.63365	85.289
GOTERM_CC_ALL	GO:0044464~cell part	45	84.9057	0.385219	PHLDB1, AURKAIP1, TNFRSF12A, TRA2B, CSPG4, RABEPK, ECHDC2, AFAP1L2, CNP, WTIP, MYBL1, H19, PIN1, MBP, TRIM47, BAK1, POLE4, EIF4EBP1, GSN, TMED3, TNR, PAK4, H2AFZ, VWC2, OLIG2, SARDH, CCDC106, SOX10, MAG, NDUFA13, KRT10, JUNB, ITPR2, ARPC1B, PRKCQ, CCND1, RPS16, S100B, WRAP53, HIST1H3A, CCL27A, TCHP, DPM3, RCN3, SST	50	17135	19662	1.03273	1	0.877077	99.8462
GOTERM_CC_ALL	GO:0005623~cell	45	84.9057	0.400727	PHLDB1, AURKAIP1, TNFRSF12A, TRA2B, CSPG4, RABEPK, ECHDC2, AFAP1L2, CNP, WTIP, MYBL1, H19, PIN1, MBP, TRIM47, BAK1, POLE4, EIF4EBP1, GSN, TMED3, TNR, PAK4, H2AFZ, VWC2, OLIG2, SARDH, CCDC106, SOX10, MAG, NDUFA13, KRT10, JUNB, ITPR2, ARPC1B, PRKCQ, CCND1, RPS16, S100B, WRAP53, HIST1H3A, CCL27A, TCHP, DPM3, RCN3, SST	50	17173	19662	1.03044	1	0.882726	99.8906
Annotation Cluster 13	Enrichment Score: 1.272410216497832
Category	Term	Count	%	PValue	Genes	List Total	Pop Hits	Pop Total	Fold Enrichment	Bonferroni	Benjamini	FDR
GOTERM_BP_ALL	GO:0048870~cell motility	11	20.7547	0.00147	CXCL1, PRKCQ, SOX10, TNFRSF12A, GSN, TNR, COL3A1, CSPG4, CCL27A, SST, PIN1	46	1348	18082	3.20768	0.927624	0.0838078	2.46478
GOTERM_BP_ALL	GO:0051674~localization of cell	11	20.7547	0.00147	CXCL1, PRKCQ, SOX10, TNFRSF12A, GSN, TNR, COL3A1, CSPG4, CCL27A, SST, PIN1	46	1348	18082	3.20768	0.927624	0.0838078	2.46478
GOTERM_BP_ALL	GO:0040011~locomotion	11	20.7547	0.00372569	CXCL1, PRKCQ, SOX10, TNFRSF12A, GSN, TNR, COL3A1, CSPG4, CCL27A, SST, PIN1	46	1529	18082	2.82796	0.998722	0.118132	6.13605
GOTERM_BP_ALL	GO:0006928~movement of cell or subcellular component	11	20.7547	0.00864926	CXCL1, PRKCQ, SOX10, TNFRSF12A, GSN, TNR, COL3A1, CSPG4, CCL27A, SST, PIN1	46	1724	18082	2.5081	1	0.201265	13.7027
GOTERM_BP_ALL	GO:0016477~cell migration	9	16.9811	0.00874257	CXCL1, PRKCQ, SOX10, TNFRSF12A, GSN, TNR, COL3A1, CSPG4, CCL27A	46	1199	18082	2.95061	1	0.200617	13.8404
GOTERM_BP_ALL	GO:0010647~positive regulation of cell communication	10	18.8679	0.0100601	PRKCQ, BAK1, S100B, TNFRSF12A, GSN, TNR, COL3A1, CSPG4, AFAP1L2, PIN1	46	1490	18082	2.63817	1	0.213877	15.7627
GOTERM_BP_ALL	GO:0023056~positive regulation of signaling	10	18.8679	0.0103586	PRKCQ, BAK1, S100B, TNFRSF12A, GSN, TNR, COL3A1, CSPG4, AFAP1L2, PIN1	46	1497	18082	2.62583	1	0.21446	16.1926
GOTERM_BP_ALL	GO:0048584~positive regulation of response to stimulus	11	20.7547	0.0131042	CXCL1, PRKCQ, BAK1, S100B, TNFRSF12A, GSN, COL3A1, CSPG4, CCL27A, AFAP1L2, PIN1	46	1834	18082	2.35766	1	0.237109	20.0509
GOTERM_CC_ALL	GO:0005615~extracellular space	9	16.9811	0.0407867	CXCL1, S100B, GSN, COL3A1, CCL27A, VWC2, KRT10, CNP, SST	50	1585	19662	2.23291	0.999995	0.398529	42.5616
GOTERM_BP_ALL	GO:2000145~regulation of cell motility	6	11.3208	0.0438451	CXCL1, GSN, COL3A1, CCL27A, SST, PIN1	46	782	18082	3.01601	1	0.393587	53.2625
GOTERM_BP_ALL	GO:0040012~regulation of locomotion	6	11.3208	0.0516815	CXCL1, GSN, COL3A1, CCL27A, SST, PIN1	46	819	18082	2.87976	1	0.423455	59.3527
GOTERM_BP_ALL	GO:0051270~regulation of cellular component movement	6	11.3208	0.0578944	CXCL1, GSN, COL3A1, CCL27A, SST, PIN1	46	846	18082	2.78785	1	0.448279	63.6417
GOTERM_BP_ALL	GO:0001101~response to acid chemical	4	7.54717	0.0727191	GSN, COL3A1, NDUFA13, SST	46	390	18082	4.03166	1	0.491969	72.2192
GOTERM_MF_ALL	GO:0005102~receptor binding	8	15.0943	0.0855765	CXCL1, MAG, S100B, TNR, COL3A1, CCL27A, OSGIN1, SST	44	1562	17446	2.03073	1	0.88928	68.6276
GOTERM_BP_ALL	GO:0030334~regulation of cell migration	5	9.43396	0.112003	CXCL1, GSN, COL3A1, CCL27A, SST	46	742	18082	2.64883	1	0.588184	86.6708
GOTERM_BP_ALL	GO:0032101~regulation of response to external stimulus	5	9.43396	0.123287	CXCL1, PRKCQ, TNR, HIST1H3A, CCL27A	46	769	18082	2.55583	1	0.615082	89.2703
GOTERM_BP_ALL	GO:0060326~cell chemotaxis	3	5.66038	0.137437	CXCL1, PRKCQ, CCL27A	46	261	18082	4.51824	1	0.634789	91.8586
GOTERM_BP_ALL	GO:0002682~regulation of immune system process	6	11.3208	0.197322	CXCL1, PRKCQ, GSN, COL3A1, HIST1H3A, CCL27A	46	1249	18082	1.88833	1	0.734328	97.5981
GOTERM_BP_ALL	GO:0042060~wound healing	3	5.66038	0.268088	PRKCQ, GSN, COL3A1	46	406	18082	2.90458	1	0.81325	99.4982
GOTERM_BP_ALL	GO:0032879~regulation of localization	9	16.9811	0.289371	CXCL1, PRKCQ, BAK1, GSN, WRAP53, COL3A1, CCL27A, SST, PIN1	46	2530	18082	1.39833	1	0.832733	99.6958
GOTERM_BP_ALL	GO:0002376~immune system process	8	15.0943	0.363861	CXCL1, PRKCQ, BAK1, GSN, COL3A1, HIST1H3A, CCL27A, JUNB	46	2342	18082	1.34274	1	0.890532	99.9535
GOTERM_BP_ALL	GO:0006935~chemotaxis	3	5.66038	0.38704	CXCL1, PRKCQ, CCL27A	46	536	18082	2.20011	1	0.904497	99.9752
GOTERM_BP_ALL	GO:0042330~taxis	3	5.66038	0.388821	CXCL1, PRKCQ, CCL27A	46	538	18082	2.19193	1	0.905222	99.9764
GOTERM_BP_ALL	GO:0002684~positive regulation of immune system process	3	5.66038	0.585352	CXCL1, PRKCQ, CCL27A	46	782	18082	1.50801	1	0.975427	100
GOTERM_BP_ALL	GO:0006955~immune response	4	7.54717	0.600541	CXCL1, PRKCQ, COL3A1, CCL27A	46	1233	18082	1.27522	1	0.977243	100
Annotation Cluster 14	Enrichment Score: 1.270391813854126
Category	Term	Count	%	PValue	Genes	List Total	Pop Hits	Pop Total	Fold Enrichment	Bonferroni	Benjamini	FDR
GOTERM_BP_ALL	GO:0051592~response to calcium ion	3	5.66038	0.0398161	CCND1, KRT10, JUNB	46	127	18082	9.28552	1	0.381403	49.8068
GOTERM_BP_ALL	GO:0071248~cellular response to metal ion	3	5.66038	0.0468474	GSN, KRT10, JUNB	46	139	18082	8.48389	1	0.4068	55.6908
GOTERM_BP_ALL	GO:0010035~response to inorganic substance	5	9.43396	0.0494163	BAK1, CCND1, GSN, KRT10, JUNB	46	558	18082	3.52228	1	0.418236	57.6738
GOTERM_BP_ALL	GO:0010038~response to metal ion	4	7.54717	0.0494175	CCND1, GSN, KRT10, JUNB	46	332	18082	4.73599	1	0.416365	57.6747
GOTERM_BP_ALL	GO:0071241~cellular response to inorganic substance	3	5.66038	0.0976214	GSN, KRT10, JUNB	46	212	18082	5.56255	1	0.552553	82.4944
Annotation Cluster 15	Enrichment Score: 1.1879652717400608
Category	Term	Count	%	PValue	Genes	List Total	Pop Hits	Pop Total	Fold Enrichment	Bonferroni	Benjamini	FDR
GOTERM_BP_ALL	GO:0048522~positive regulation of cellular process	29	54.717	5.47241e-07	CXCL1, PHLDB1, AURKAIP1, TNFRSF12A, TRA2B, COL3A1, CSPG4, OSGIN1, AFAP1L2, MYBL1, WTIP, PIN1, BAK1, EIF4EBP1, GSN, TNR, H2AFZ, VWC2, OLIG2, SOX10, MAG, NDUFA13, JUNB, PRKCQ, ARPC1B, CCND1, S100B, WRAP53, CCL27A	46	4808	18082	2.37095	0.000976348	0.000976348	0.000928381
GOTERM_BP_ALL	GO:0048518~positive regulation of biological process	30	56.6038	1.13791e-06	CXCL1, PHLDB1, AURKAIP1, TNFRSF12A, TRA2B, COL3A1, CSPG4, OSGIN1, AFAP1L2, MYBL1, WTIP, PIN1, BAK1, EIF4EBP1, GSN, TNR, H2AFZ, VWC2, OLIG2, SOX10, MAG, NDUFA13, JUNB, PRKCQ, ARPC1B, CCND1, S100B, WRAP53, HIST1H3A, CCL27A	46	5311	18082	2.22041	0.00202911	0.00101507	0.00193043
GOTERM_BP_ALL	GO:0048523~negative regulation of cellular process	23	43.3962	0.000319886	MAG, SOX10, TRA2B, COL3A1, CSPG4, NDUFA13, OSGIN1, WTIP, JUNB, H19, PIN1, BAK1, PRKCQ, EIF4EBP1, CCND1, S100B, GSN, TNR, HIST1H3A, H2AFZ, TCHP, VWC2, OLIG2	46	4417	18082	2.04686	0.435089	0.0614829	0.541298
GOTERM_BP_ALL	GO:0048519~negative regulation of biological process	23	43.3962	0.000962047	MAG, SOX10, TRA2B, COL3A1, CSPG4, NDUFA13, OSGIN1, WTIP, JUNB, H19, PIN1, BAK1, PRKCQ, EIF4EBP1, CCND1, S100B, GSN, TNR, HIST1H3A, H2AFZ, TCHP, VWC2, OLIG2	46	4757	18082	1.90057	0.82059	0.0823177	1.61962
GOTERM_BP_ALL	GO:0009893~positive regulation of metabolic process	17	32.0755	0.00164236	CXCL1, SOX10, AURKAIP1, TRA2B, CSPG4, NDUFA13, AFAP1L2, MYBL1, JUNB, PIN1, BAK1, PRKCQ, CCND1, GSN, WRAP53, HIST1H3A, H2AFZ	46	3004	18082	2.22453	0.946817	0.0850716	2.75
GOTERM_BP_ALL	GO:0010629~negative regulation of gene expression	12	22.6415	0.00174691	SOX10, BAK1, EIF4EBP1, CCND1, TRA2B, HIST1H3A, H2AFZ, NDUFA13, OLIG2, WTIP, JUNB, H19	46	1628	18082	2.89745	0.955885	0.0853101	2.92263
GOTERM_BP_ALL	GO:0031325~positive regulation of cellular metabolic process	16	30.1887	0.00205844	CXCL1, SOX10, AURKAIP1, TRA2B, CSPG4, NDUFA13, AFAP1L2, MYBL1, JUNB, PIN1, BAK1, PRKCQ, CCND1, GSN, WRAP53, H2AFZ	46	2769	18082	2.27136	0.974729	0.0878514	3.43531
GOTERM_BP_ALL	GO:0010604~positive regulation of macromolecule metabolic process	16	30.1887	0.00225452	SOX10, AURKAIP1, TRA2B, CSPG4, NDUFA13, AFAP1L2, MYBL1, JUNB, PIN1, BAK1, PRKCQ, CCND1, GSN, WRAP53, HIST1H3A, H2AFZ	46	2794	18082	2.25103	0.982205	0.0935912	3.75669
GOTERM_CC_ALL	GO:0005654~nucleoplasm	14	26.4151	0.00369206	SOX10, CCND1, EIF4EBP1, POLE4, AURKAIP1, TNR, WRAP53, HIST1H3A, NDUFA13, CNP, MYBL1, CCDC106, JUNB, PIN1	50	2325	19662	2.3679	0.661684	0.165255	4.80573
GOTERM_CC_ALL	GO:0032991~macromolecular complex	22	41.5094	0.00732924	AURKAIP1, COL3A1, NDUFA13, WTIP, JUNB, H19, ITPR2, ARPC1B, BAK1, CCND1, POLE4, EIF4EBP1, RPS16, GSN, TMED3, WRAP53, HIST1H3A, H2AFZ, TCHP, VWC2, DPM3, OLIG2	50	5097	19662	1.69733	0.88414	0.212968	9.33035
GOTERM_CC_ALL	GO:0070013~intracellular organelle lumen	17	32.0755	0.00992813	SOX10, AURKAIP1, NDUFA13, CNP, MYBL1, JUNB, PIN1, POLE4, EIF4EBP1, CCND1, TNR, WRAP53, HIST1H3A, H2AFZ, RCN3, SARDH, CCDC106	50	3548	19662	1.88418	0.946254	0.233385	12.4406
GOTERM_CC_ALL	GO:0043233~organelle lumen	17	32.0755	0.0102799	SOX10, AURKAIP1, NDUFA13, CNP, MYBL1, JUNB, PIN1, POLE4, EIF4EBP1, CCND1, TNR, WRAP53, HIST1H3A, H2AFZ, RCN3, SARDH, CCDC106	50	3561	19662	1.8773	0.951568	0.222988	12.8539
GOTERM_BP_ALL	GO:0031323~regulation of cellular metabolic process	23	43.3962	0.0104787	CXCL1, SOX10, AURKAIP1, TRA2B, CSPG4, NDUFA13, AFAP1L2, MYBL1, WTIP, JUNB, H19, PIN1, BAK1, PRKCQ, CCND1, EIF4EBP1, S100B, GSN, WRAP53, HIST1H3A, H2AFZ, VWC2, OLIG2	46	5673	18082	1.59369	1	0.21421	16.3649
GOTERM_BP_ALL	GO:0010605~negative regulation of macromolecule metabolic process	13	24.5283	0.0112406	SOX10, BAK1, CCND1, EIF4EBP1, TRA2B, HIST1H3A, H2AFZ, NDUFA13, OLIG2, WTIP, JUNB, H19, PIN1	46	2372	18082	2.15436	1	0.220508	17.4508
GOTERM_CC_ALL	GO:0044446~intracellular organelle part	28	52.8302	0.0112839	AURKAIP1, TRA2B, RABEPK, CNP, MYBL1, PIN1, BAK1, EIF4EBP1, POLE4, TMED3, GSN, TNR, H2AFZ, SARDH, CCDC106, SOX10, NDUFA13, KRT10, JUNB, ITPR2, ARPC1B, CCND1, RPS16, WRAP53, HIST1H3A, TCHP, DPM3, RCN3	50	7483	19662	1.47143	0.964027	0.225678	14.0237
GOTERM_CC_ALL	GO:0031974~membrane-enclosed lumen	17	32.0755	0.012257	SOX10, AURKAIP1, NDUFA13, CNP, MYBL1, JUNB, PIN1, POLE4, EIF4EBP1, CCND1, TNR, WRAP53, HIST1H3A, H2AFZ, RCN3, SARDH, CCDC106	50	3628	19662	1.84264	0.973042	0.227487	15.1436
GOTERM_BP_ALL	GO:0051172~negative regulation of nitrogen compound metabolic process	10	18.8679	0.0158754	SOX10, EIF4EBP1, CCND1, TRA2B, HIST1H3A, H2AFZ, NDUFA13, OLIG2, WTIP, JUNB	46	1605	18082	2.44914	1	0.257366	23.7753
GOTERM_CC_ALL	GO:0044422~organelle part	28	52.8302	0.0160577	AURKAIP1, TRA2B, RABEPK, CNP, MYBL1, PIN1, BAK1, EIF4EBP1, POLE4, TMED3, GSN, TNR, H2AFZ, SARDH, CCDC106, SOX10, NDUFA13, KRT10, JUNB, ITPR2, ARPC1B, CCND1, RPS16, WRAP53, HIST1H3A, TCHP, DPM3, RCN3	50	7667	19662	1.43612	0.991288	0.256542	19.3895
GOTERM_BP_ALL	GO:0048585~negative regulation of response to stimulus	9	16.9811	0.0170776	PRKCQ, SOX10, CCND1, TNR, COL3A1, NDUFA13, VWC2, WTIP, PIN1	46	1350	18082	2.62058	1	0.264694	25.3396
GOTERM_CC_ALL	GO:0031981~nuclear lumen	15	28.3019	0.0182991	SOX10, CCND1, EIF4EBP1, POLE4, AURKAIP1, TNR, WRAP53, HIST1H3A, H2AFZ, NDUFA13, CNP, MYBL1, CCDC106, JUNB, PIN1	50	3139	19662	1.87913	0.995534	0.272624	21.8006
GOTERM_BP_ALL	GO:0080090~regulation of primary metabolic process	22	41.5094	0.0205733	SOX10, AURKAIP1, TRA2B, CSPG4, NDUFA13, AFAP1L2, MYBL1, WTIP, JUNB, H19, PIN1, BAK1, PRKCQ, CCND1, EIF4EBP1, S100B, GSN, WRAP53, HIST1H3A, H2AFZ, VWC2, OLIG2	46	5629	18082	1.53631	1	0.282015	29.7186
GOTERM_BP_ALL	GO:0009892~negative regulation of metabolic process	13	24.5283	0.0209669	SOX10, BAK1, CCND1, EIF4EBP1, TRA2B, HIST1H3A, H2AFZ, NDUFA13, OLIG2, WTIP, JUNB, H19, PIN1	46	2579	18082	1.98144	1	0.284465	30.1962
GOTERM_CC_ALL	GO:0005634~nucleus	25	47.1698	0.0224571	SOX10, AURKAIP1, TRA2B, NDUFA13, CNP, KRT10, MYBL1, WTIP, JUNB, MBP, PIN1, PRKCQ, TRIM47, CCND1, POLE4, EIF4EBP1, S100B, GSN, TNR, WRAP53, HIST1H3A, H2AFZ, CCL27A, OLIG2, CCDC106	50	6713	19662	1.46447	0.998712	0.309072	26.0975
GOTERM_BP_ALL	GO:0010468~regulation of gene expression	18	33.9623	0.0232956	SOX10, TRA2B, NDUFA13, AFAP1L2, MYBL1, WTIP, JUNB, H19, PIN1, BAK1, PRKCQ, EIF4EBP1, CCND1, GSN, HIST1H3A, H2AFZ, VWC2, OLIG2	46	4268	18082	1.65782	1	0.304214	32.9601
GOTERM_BP_ALL	GO:0010648~negative regulation of cell communication	8	15.0943	0.0234668	PRKCQ, SOX10, CCND1, TNR, NDUFA13, VWC2, WTIP, PIN1	46	1160	18082	2.71094	1	0.303918	33.1592
GOTERM_BP_ALL	GO:0023057~negative regulation of signaling	8	15.0943	0.0238621	PRKCQ, SOX10, CCND1, TNR, NDUFA13, VWC2, WTIP, PIN1	46	1164	18082	2.70163	1	0.301802	33.6167
GOTERM_BP_ALL	GO:2000113~negative regulation of cellular macromolecule biosynthetic process	9	16.9811	0.0244882	SOX10, EIF4EBP1, CCND1, HIST1H3A, H2AFZ, NDUFA13, OLIG2, WTIP, JUNB	46	1443	18082	2.45169	1	0.306323	34.3354
GOTERM_BP_ALL	GO:0019222~regulation of metabolic process	23	43.3962	0.0250317	CXCL1, SOX10, AURKAIP1, TRA2B, CSPG4, NDUFA13, AFAP1L2, MYBL1, WTIP, JUNB, H19, PIN1, BAK1, PRKCQ, CCND1, EIF4EBP1, S100B, GSN, WRAP53, HIST1H3A, H2AFZ, VWC2, OLIG2	46	6098	18082	1.48262	1	0.30989	34.9533
GOTERM_BP_ALL	GO:0060255~regulation of macromolecule metabolic process	22	41.5094	0.025546	SOX10, AURKAIP1, TRA2B, CSPG4, NDUFA13, AFAP1L2, MYBL1, WTIP, JUNB, H19, PIN1, BAK1, PRKCQ, CCND1, EIF4EBP1, S100B, GSN, WRAP53, HIST1H3A, H2AFZ, VWC2, OLIG2	46	5739	18082	1.50687	1	0.311002	35.5329
GOTERM_CC_ALL	GO:0044428~nuclear part	16	30.1887	0.027011	SOX10, AURKAIP1, TRA2B, NDUFA13, CNP, MYBL1, JUNB, PIN1, POLE4, EIF4EBP1, CCND1, TNR, WRAP53, HIST1H3A, H2AFZ, CCDC106	50	3625	19662	1.73568	0.999672	0.330453	30.5523
GOTERM_BP_ALL	GO:0031324~negative regulation of cellular metabolic process	12	22.6415	0.0286511	SOX10, BAK1, EIF4EBP1, CCND1, TRA2B, HIST1H3A, H2AFZ, NDUFA13, OLIG2, WTIP, JUNB, PIN1	46	2380	18082	1.98195	1	0.331181	38.9307
GOTERM_BP_ALL	GO:0010558~negative regulation of macromolecule biosynthetic process	9	16.9811	0.0306618	SOX10, EIF4EBP1, CCND1, HIST1H3A, H2AFZ, NDUFA13, OLIG2, WTIP, JUNB	46	1506	18082	2.34913	1	0.341608	41.0402
GOTERM_MF_ALL	GO:0000989~transcription factor activity, transcription factor binding	5	9.43396	0.0322257	SOX10, CCND1, WTIP, MYBL1, JUNB	44	491	17446	4.03768	0.999683	0.800434	34.5875
GOTERM_MF_ALL	GO:0000988~transcription factor activity, protein binding	5	9.43396	0.0334802	SOX10, CCND1, WTIP, MYBL1, JUNB	44	497	17446	3.98893	0.99977	0.752462	35.6777
GOTERM_BP_ALL	GO:0031327~negative regulation of cellular biosynthetic process	9	16.9811	0.037244	SOX10, EIF4EBP1, CCND1, HIST1H3A, H2AFZ, NDUFA13, OLIG2, WTIP, JUNB	46	1564	18082	2.26201	1	0.373272	47.4763
GOTERM_BP_ALL	GO:0051253~negative regulation of RNA metabolic process	8	15.0943	0.0378479	SOX10, CCND1, TRA2B, HIST1H3A, H2AFZ, NDUFA13, OLIG2, JUNB	46	1283	18082	2.45105	1	0.374062	48.0324
GOTERM_BP_ALL	GO:0010467~gene expression	20	37.7358	0.0383314	SOX10, AURKAIP1, TRA2B, NDUFA13, AFAP1L2, MYBL1, WTIP, JUNB, H19, PIN1, BAK1, PRKCQ, CCND1, EIF4EBP1, RPS16, GSN, HIST1H3A, H2AFZ, VWC2, OLIG2	46	5224	18082	1.50493	1	0.373895	48.4737
GOTERM_BP_ALL	GO:0009968~negative regulation of signal transduction	7	13.2075	0.0403265	PRKCQ, SOX10, CCND1, NDUFA13, VWC2, WTIP, PIN1	46	1025	18082	2.6845	1	0.383308	50.2575
GOTERM_BP_ALL	GO:0009890~negative regulation of biosynthetic process	9	16.9811	0.041134	SOX10, EIF4EBP1, CCND1, HIST1H3A, H2AFZ, NDUFA13, OLIG2, WTIP, JUNB	46	1595	18082	2.21805	1	0.381601	50.9628
GOTERM_BP_ALL	GO:0051171~regulation of nitrogen compound metabolic process	17	32.0755	0.0434806	SOX10, TRA2B, NDUFA13, AFAP1L2, MYBL1, WTIP, JUNB, H19, PIN1, PRKCQ, EIF4EBP1, CCND1, WRAP53, HIST1H3A, H2AFZ, VWC2, OLIG2	46	4221	18082	1.58315	1	0.3929	52.9594
GOTERM_BP_ALL	GO:0045935~positive regulation of nucleobase-containing compound metabolic process	9	16.9811	0.0468335	PRKCQ, SOX10, WRAP53, TRA2B, H2AFZ, AFAP1L2, MYBL1, JUNB, PIN1	46	1637	18082	2.16114	1	0.408604	55.6799
GOTERM_BP_ALL	GO:0019219~regulation of nucleobase-containing compound metabolic process	16	30.1887	0.048121	SOX10, TRA2B, NDUFA13, AFAP1L2, MYBL1, WTIP, JUNB, H19, PIN1, PRKCQ, CCND1, WRAP53, HIST1H3A, H2AFZ, VWC2, OLIG2	46	3924	18082	1.6028	1	0.411577	56.6846
GOTERM_BP_ALL	GO:0010556~regulation of macromolecule biosynthetic process	16	30.1887	0.0522464	SOX10, NDUFA13, AFAP1L2, MYBL1, WTIP, JUNB, PIN1, PRKCQ, EIF4EBP1, CCND1, S100B, WRAP53, HIST1H3A, H2AFZ, VWC2, OLIG2	46	3966	18082	1.58583	1	0.42333	59.7615
GOTERM_BP_ALL	GO:0010628~positive regulation of gene expression	9	16.9811	0.0576305	SOX10, GSN, TRA2B, HIST1H3A, H2AFZ, AFAP1L2, MYBL1, JUNB, PIN1	46	1708	18082	2.0713	1	0.448573	63.4685
GOTERM_MF_ALL	GO:0000978~RNA polymerase II core promoter proximal region sequence-specific DNA binding	4	7.54717	0.0582755	SOX10, H2AFZ, MYBL1, JUNB	44	359	17446	4.41783	1	0.87877	54.069
GOTERM_BP_ALL	GO:0045934~negative regulation of nucleobase-containing compound metabolic process	8	15.0943	0.0592011	SOX10, CCND1, TRA2B, HIST1H3A, H2AFZ, NDUFA13, OLIG2, JUNB	46	1417	18082	2.21926	1	0.450377	64.4878
GOTERM_BP_ALL	GO:0044237~cellular metabolic process	31	58.4906	0.0611381	CXCL1, AURKAIP1, TRA2B, COL3A1, CSPG4, ECHDC2, CNP, AFAP1L2, WTIP, MYBL1, H19, PIN1, BAK1, EIF4EBP1, POLE4, GSN, PAK4, H2AFZ, VWC2, OLIG2, SARDH, SOX10, NDUFA13, JUNB, PRKCQ, CCND1, S100B, RPS16, WRAP53, HIST1H3A, DPM3	46	9794	18082	1.2442	1	0.459551	65.708
GOTERM_BP_ALL	GO:0046483~heterocycle metabolic process	20	37.7358	0.0617736	SOX10, AURKAIP1, TRA2B, NDUFA13, CNP, AFAP1L2, MYBL1, WTIP, JUNB, H19, PIN1, PRKCQ, CCND1, RPS16, WRAP53, HIST1H3A, H2AFZ, VWC2, OLIG2, SARDH	46	5497	18082	1.43019	1	0.459487	66.0997
GOTERM_BP_ALL	GO:0051173~positive regulation of nitrogen compound metabolic process	9	16.9811	0.0633326	PRKCQ, SOX10, WRAP53, TRA2B, H2AFZ, AFAP1L2, MYBL1, JUNB, PIN1	46	1742	18082	2.03087	1	0.464487	67.0428
GOTERM_BP_ALL	GO:0090304~nucleic acid metabolic process	18	33.9623	0.0659431	SOX10, AURKAIP1, TRA2B, NDUFA13, AFAP1L2, MYBL1, WTIP, JUNB, H19, PIN1, PRKCQ, CCND1, RPS16, WRAP53, HIST1H3A, H2AFZ, VWC2, OLIG2	46	4805	18082	1.47254	1	0.469647	68.5668
GOTERM_MF_ALL	GO:0000987~core promoter proximal region sequence-specific DNA binding	4	7.54717	0.0663447	SOX10, H2AFZ, MYBL1, JUNB	44	379	17446	4.1847	1	0.878874	58.9155
GOTERM_MF_ALL	GO:0001159~core promoter proximal region DNA binding	4	7.54717	0.0671789	SOX10, H2AFZ, MYBL1, JUNB	44	381	17446	4.16273	1	0.850553	59.3886
GOTERM_BP_ALL	GO:0006725~cellular aromatic compound metabolic process	20	37.7358	0.0684312	SOX10, AURKAIP1, TRA2B, NDUFA13, CNP, AFAP1L2, MYBL1, WTIP, JUNB, H19, PIN1, PRKCQ, CCND1, RPS16, WRAP53, HIST1H3A, H2AFZ, VWC2, OLIG2, SARDH	46	5560	18082	1.41398	1	0.477366	69.9575
GOTERM_BP_ALL	GO:0031326~regulation of cellular biosynthetic process	16	30.1887	0.07209	SOX10, NDUFA13, AFAP1L2, MYBL1, WTIP, JUNB, PIN1, PRKCQ, EIF4EBP1, CCND1, S100B, WRAP53, HIST1H3A, H2AFZ, VWC2, OLIG2	46	4140	18082	1.51918	1	0.49234	71.8977
GOTERM_BP_ALL	GO:0006351~transcription, DNA-templated	13	24.5283	0.0766585	SOX10, PRKCQ, CCND1, HIST1H3A, H2AFZ, NDUFA13, VWC2, AFAP1L2, MYBL1, OLIG2, WTIP, JUNB, PIN1	46	3129	18082	1.63315	1	0.504062	74.1549
GOTERM_BP_ALL	GO:0045892~negative regulation of transcription, DNA-templated	7	13.2075	0.0770347	SOX10, CCND1, HIST1H3A, H2AFZ, NDUFA13, OLIG2, JUNB	46	1207	18082	2.27971	1	0.504125	74.333
GOTERM_BP_ALL	GO:0044763~single-organism cellular process	37	69.8113	0.0781855	CXCL1, PHLDB1, TNFRSF12A, COL3A1, CSPG4, ECHDC2, OSGIN1, AFAP1L2, CNP, WTIP, MYBL1, PIN1, MBP, BAK1, EIF4EBP1, GSN, TNR, PAK4, H2AFZ, VWC2, OLIG2, SARDH, SOX10, MAG, NDUFA13, KRT10, JUNB, ITPR2, PRKCQ, ARPC1B, CCND1, S100B, HIST1H3A, CCL27A, TCHP, DPM3, SST	46	12536	18082	1.1602	1	0.506105	74.8705
GOTERM_BP_ALL	GO:0009889~regulation of biosynthetic process	16	30.1887	0.0796043	SOX10, NDUFA13, AFAP1L2, MYBL1, WTIP, JUNB, PIN1, PRKCQ, EIF4EBP1, CCND1, S100B, WRAP53, HIST1H3A, H2AFZ, VWC2, OLIG2	46	4197	18082	1.49854	1	0.510958	75.5187
GOTERM_BP_ALL	GO:0009059~macromolecule biosynthetic process	18	33.9623	0.080424	SOX10, NDUFA13, AFAP1L2, MYBL1, WTIP, JUNB, PIN1, PRKCQ, EIF4EBP1, CCND1, S100B, RPS16, WRAP53, HIST1H3A, H2AFZ, VWC2, DPM3, OLIG2	46	4925	18082	1.43666	1	0.513011	75.886
GOTERM_BP_ALL	GO:1903507~negative regulation of nucleic acid-templated transcription	7	13.2075	0.0807138	SOX10, CCND1, HIST1H3A, H2AFZ, NDUFA13, OLIG2, JUNB	46	1222	18082	2.25173	1	0.512645	76.0145
GOTERM_CC_ALL	GO:0032993~protein-DNA complex	3	5.66038	0.0835278	POLE4, HIST1H3A, H2AFZ	50	193	19662	6.11254	1	0.489589	68.6944
GOTERM_BP_ALL	GO:2000112~regulation of cellular macromolecule biosynthetic process	15	28.3019	0.0842633	SOX10, NDUFA13, AFAP1L2, MYBL1, WTIP, JUNB, PIN1, PRKCQ, EIF4EBP1, CCND1, WRAP53, HIST1H3A, H2AFZ, VWC2, OLIG2	46	3875	18082	1.52163	1	0.525113	77.5382
GOTERM_BP_ALL	GO:1902679~negative regulation of RNA biosynthetic process	7	13.2075	0.0844926	SOX10, CCND1, HIST1H3A, H2AFZ, NDUFA13, OLIG2, JUNB	46	1237	18082	2.22442	1	0.524446	77.6334
GOTERM_BP_ALL	GO:0050794~regulation of cellular process	33	62.2642	0.0857741	CXCL1, PHLDB1, AURKAIP1, TNFRSF12A, TRA2B, COL3A1, CSPG4, OSGIN1, AFAP1L2, WTIP, MYBL1, H19, PIN1, BAK1, EIF4EBP1, GSN, TNR, H2AFZ, VWC2, OLIG2, SOX10, MAG, NDUFA13, JUNB, PRKCQ, ARPC1B, CCND1, S100B, WRAP53, HIST1H3A, CCL27A, TCHP, SST	46	10870	18082	1.19336	1	0.526693	78.1587
GOTERM_BP_ALL	GO:0044260~cellular macromolecule metabolic process	26	49.0566	0.0888282	AURKAIP1, TRA2B, COL3A1, CSPG4, AFAP1L2, MYBL1, WTIP, H19, PIN1, BAK1, EIF4EBP1, POLE4, GSN, PAK4, H2AFZ, VWC2, OLIG2, SOX10, NDUFA13, JUNB, PRKCQ, CCND1, RPS16, WRAP53, HIST1H3A, DPM3	46	8038	18082	1.27149	1	0.534757	79.364
GOTERM_BP_ALL	GO:1901360~organic cyclic compound metabolic process	20	37.7358	0.0891	SOX10, AURKAIP1, TRA2B, NDUFA13, CNP, AFAP1L2, MYBL1, WTIP, JUNB, H19, PIN1, PRKCQ, CCND1, RPS16, WRAP53, HIST1H3A, H2AFZ, VWC2, OLIG2, SARDH	46	5731	18082	1.37179	1	0.532633	79.4682
GOTERM_BP_ALL	GO:0051252~regulation of RNA metabolic process	14	26.4151	0.092295	SOX10, TRA2B, NDUFA13, AFAP1L2, MYBL1, WTIP, JUNB, PIN1, PRKCQ, CCND1, HIST1H3A, H2AFZ, VWC2, OLIG2	46	3575	18082	1.53936	1	0.540957	80.6563
GOTERM_BP_ALL	GO:0010557~positive regulation of macromolecule biosynthetic process	8	15.0943	0.0931026	PRKCQ, SOX10, WRAP53, H2AFZ, AFAP1L2, MYBL1, JUNB, PIN1	46	1577	18082	1.9941	1	0.542622	80.9462
GOTERM_BP_ALL	GO:0006139~nucleobase-containing compound metabolic process	19	35.8491	0.0932923	SOX10, AURKAIP1, TRA2B, NDUFA13, CNP, AFAP1L2, MYBL1, WTIP, JUNB, H19, PIN1, PRKCQ, CCND1, RPS16, WRAP53, HIST1H3A, H2AFZ, VWC2, OLIG2	46	5389	18082	1.38591	1	0.541787	81.0137
GOTERM_BP_ALL	GO:0044699~single-organism process	40	75.4717	0.0949697	CXCL1, PHLDB1, TNFRSF12A, TRA2B, COL3A1, CSPG4, ECHDC2, OSGIN1, AFAP1L2, CNP, WTIP, MYBL1, H19, PIN1, MBP, BAK1, EIF4EBP1, GSN, TNR, PAK4, H2AFZ, VWC2, OLIG2, SARDH, SOX10, MAG, NDUFA13, KRT10, JUNB, ITPR2, PRKCQ, ARPC1B, CCND1, RPS16, S100B, HIST1H3A, CCL27A, TCHP, DPM3, SST	46	14030	18082	1.1207	1	0.5469	81.6009
GOTERM_BP_ALL	GO:0016070~RNA metabolic process	16	30.1887	0.0993424	SOX10, AURKAIP1, TRA2B, NDUFA13, AFAP1L2, MYBL1, WTIP, JUNB, PIN1, PRKCQ, CCND1, RPS16, HIST1H3A, H2AFZ, VWC2, OLIG2	46	4331	18082	1.45218	1	0.557612	83.0522
GOTERM_BP_ALL	GO:0065007~biological regulation	35	66.0377	0.111303	CXCL1, PHLDB1, AURKAIP1, TNFRSF12A, TRA2B, COL3A1, CSPG4, OSGIN1, CNP, AFAP1L2, WTIP, MYBL1, H19, PIN1, BAK1, EIF4EBP1, GSN, TNR, H2AFZ, VWC2, OLIG2, SOX10, MAG, NDUFA13, JUNB, PRKCQ, ARPC1B, CCND1, S100B, WRAP53, HIST1H3A, CCL27A, TCHP, DPM3, SST	46	11917	18082	1.15449	1	0.58882	86.4912
GOTERM_BP_ALL	GO:0034645~cellular macromolecule biosynthetic process	17	32.0755	0.11823	SOX10, NDUFA13, AFAP1L2, MYBL1, WTIP, JUNB, PIN1, PRKCQ, EIF4EBP1, CCND1, RPS16, WRAP53, HIST1H3A, H2AFZ, VWC2, DPM3, OLIG2	46	4810	18082	1.38929	1	0.603178	88.1707
GOTERM_BP_ALL	GO:0006366~transcription from RNA polymerase II promoter	8	15.0943	0.125464	SOX10, CCND1, H2AFZ, VWC2, OLIG2, MYBL1, JUNB, PIN1	46	1700	18082	1.84982	1	0.616033	89.7134
GOTERM_BP_ALL	GO:0031328~positive regulation of cellular biosynthetic process	8	15.0943	0.128041	PRKCQ, SOX10, WRAP53, H2AFZ, AFAP1L2, MYBL1, JUNB, PIN1	46	1709	18082	1.84008	1	0.619652	90.2158
GOTERM_BP_ALL	GO:0051254~positive regulation of RNA metabolic process	7	13.2075	0.130869	SOX10, TRA2B, H2AFZ, AFAP1L2, MYBL1, JUNB, PIN1	46	1397	18082	1.96966	1	0.623937	90.7405
GOTERM_BP_ALL	GO:0006355~regulation of transcription, DNA-templated	13	24.5283	0.135074	SOX10, PRKCQ, CCND1, HIST1H3A, H2AFZ, NDUFA13, VWC2, AFAP1L2, MYBL1, OLIG2, WTIP, JUNB, PIN1	46	3449	18082	1.48163	1	0.632155	91.4718
GOTERM_BP_ALL	GO:1903506~regulation of nucleic acid-templated transcription	13	24.5283	0.13572	SOX10, PRKCQ, CCND1, HIST1H3A, H2AFZ, NDUFA13, VWC2, AFAP1L2, MYBL1, OLIG2, WTIP, JUNB, PIN1	46	3452	18082	1.48034	1	0.632626	91.5792
GOTERM_BP_ALL	GO:2001141~regulation of RNA biosynthetic process	13	24.5283	0.137018	SOX10, PRKCQ, CCND1, HIST1H3A, H2AFZ, NDUFA13, VWC2, AFAP1L2, MYBL1, OLIG2, WTIP, JUNB, PIN1	46	3458	18082	1.47777	1	0.634984	91.7911
GOTERM_BP_ALL	GO:0009891~positive regulation of biosynthetic process	8	15.0943	0.138326	PRKCQ, SOX10, WRAP53, H2AFZ, AFAP1L2, MYBL1, JUNB, PIN1	46	1744	18082	1.80315	1	0.635944	91.9998
GOTERM_BP_ALL	GO:0006357~regulation of transcription from RNA polymerase II promoter	8	15.0943	0.147469	SOX10, CCND1, H2AFZ, VWC2, OLIG2, MYBL1, JUNB, PIN1	46	1774	18082	1.77266	1	0.65446	93.3241
GOTERM_BP_ALL	GO:0043170~macromolecule metabolic process	27	50.9434	0.156053	AURKAIP1, TRA2B, COL3A1, CSPG4, AFAP1L2, MYBL1, WTIP, H19, PIN1, BAK1, EIF4EBP1, POLE4, GSN, PAK4, H2AFZ, VWC2, OLIG2, SOX10, NDUFA13, JUNB, PRKCQ, CCND1, S100B, RPS16, WRAP53, HIST1H3A, DPM3	46	8886	18082	1.19439	1	0.671569	94.3772
GOTERM_BP_ALL	GO:0097659~nucleic acid-templated transcription	13	24.5283	0.157341	SOX10, PRKCQ, CCND1, HIST1H3A, H2AFZ, NDUFA13, VWC2, AFAP1L2, MYBL1, OLIG2, WTIP, JUNB, PIN1	46	3548	18082	1.44028	1	0.673504	94.5211
GOTERM_BP_ALL	GO:0006807~nitrogen compound metabolic process	21	39.6226	0.15765	SOX10, AURKAIP1, TRA2B, NDUFA13, CNP, AFAP1L2, MYBL1, WTIP, JUNB, H19, PIN1, PRKCQ, CCND1, EIF4EBP1, RPS16, WRAP53, HIST1H3A, H2AFZ, VWC2, OLIG2, SARDH	46	6537	18082	1.26279	1	0.672949	94.555
GOTERM_CC_ALL	GO:0044454~nuclear chromosome part	4	7.54717	0.160089	POLE4, HIST1H3A, H2AFZ, JUNB	50	555	19662	2.83416	1	0.68706	90.2012
GOTERM_BP_ALL	GO:0032774~RNA biosynthetic process	13	24.5283	0.161359	SOX10, PRKCQ, CCND1, HIST1H3A, H2AFZ, NDUFA13, VWC2, AFAP1L2, MYBL1, OLIG2, WTIP, JUNB, PIN1	46	3565	18082	1.43342	1	0.676933	94.9478
GOTERM_BP_ALL	GO:0050789~regulation of biological process	33	62.2642	0.161551	CXCL1, PHLDB1, AURKAIP1, TNFRSF12A, TRA2B, COL3A1, CSPG4, OSGIN1, AFAP1L2, WTIP, MYBL1, H19, PIN1, BAK1, EIF4EBP1, GSN, TNR, H2AFZ, VWC2, OLIG2, SOX10, MAG, NDUFA13, JUNB, PRKCQ, ARPC1B, CCND1, S100B, WRAP53, HIST1H3A, CCL27A, TCHP, SST	46	11372	18082	1.14068	1	0.676097	94.9674
GOTERM_BP_ALL	GO:0034641~cellular nitrogen compound metabolic process	20	37.7358	0.166426	SOX10, AURKAIP1, TRA2B, NDUFA13, CNP, AFAP1L2, MYBL1, WTIP, JUNB, H19, PIN1, PRKCQ, CCND1, EIF4EBP1, RPS16, WRAP53, HIST1H3A, H2AFZ, VWC2, OLIG2	46	6198	18082	1.26843	1	0.684067	95.4414
GOTERM_BP_ALL	GO:0034654~nucleobase-containing compound biosynthetic process	14	26.4151	0.166953	SOX10, NDUFA13, AFAP1L2, MYBL1, WTIP, JUNB, PIN1, PRKCQ, CCND1, WRAP53, HIST1H3A, H2AFZ, VWC2, OLIG2	46	3952	18082	1.39251	1	0.682758	95.4901
GOTERM_BP_ALL	GO:0044271~cellular nitrogen compound biosynthetic process	16	30.1887	0.173442	SOX10, NDUFA13, AFAP1L2, MYBL1, WTIP, JUNB, PIN1, PRKCQ, EIF4EBP1, CCND1, RPS16, WRAP53, HIST1H3A, H2AFZ, VWC2, OLIG2	46	4719	18082	1.33278	1	0.695435	96.0504
GOTERM_MF_ALL	GO:0000977~RNA polymerase II regulatory region sequence-specific DNA binding	4	7.54717	0.180274	SOX10, H2AFZ, MYBL1, JUNB	44	595	17446	2.66555	1	0.961615	92.3911
GOTERM_CC_ALL	GO:0000228~nuclear chromosome	4	7.54717	0.180281	POLE4, HIST1H3A, H2AFZ, JUNB	50	588	19662	2.6751	1	0.718108	92.9131
GOTERM_BP_ALL	GO:0018130~heterocycle biosynthetic process	14	26.4151	0.180535	SOX10, NDUFA13, AFAP1L2, MYBL1, WTIP, JUNB, PIN1, PRKCQ, CCND1, WRAP53, HIST1H3A, H2AFZ, VWC2, OLIG2	46	4009	18082	1.37272	1	0.707637	96.5876
GOTERM_MF_ALL	GO:0001012~RNA polymerase II regulatory region DNA binding	4	7.54717	0.183985	SOX10, H2AFZ, MYBL1, JUNB	44	601	17446	2.63894	1	0.94725	92.8255
GOTERM_BP_ALL	GO:0019438~aromatic compound biosynthetic process	14	26.4151	0.184451	SOX10, NDUFA13, AFAP1L2, MYBL1, WTIP, JUNB, PIN1, PRKCQ, CCND1, WRAP53, HIST1H3A, H2AFZ, VWC2, OLIG2	46	4025	18082	1.36726	1	0.714924	96.854
GOTERM_BP_ALL	GO:0044238~primary metabolic process	29	54.717	0.186294	AURKAIP1, TRA2B, COL3A1, CSPG4, ECHDC2, CNP, AFAP1L2, MYBL1, WTIP, H19, PIN1, BAK1, EIF4EBP1, POLE4, GSN, PAK4, H2AFZ, VWC2, OLIG2, SOX10, NDUFA13, JUNB, PRKCQ, CCND1, S100B, RPS16, WRAP53, HIST1H3A, DPM3	46	9853	18082	1.15696	1	0.716413	96.9724
GOTERM_BP_ALL	GO:1901362~organic cyclic compound biosynthetic process	14	26.4151	0.210969	SOX10, NDUFA13, AFAP1L2, MYBL1, WTIP, JUNB, PIN1, PRKCQ, CCND1, WRAP53, HIST1H3A, H2AFZ, VWC2, OLIG2	46	4129	18082	1.33282	1	0.751248	98.2044
GOTERM_CC_ALL	GO:0000790~nuclear chromatin	3	5.66038	0.223304	HIST1H3A, H2AFZ, JUNB	50	357	19662	3.30454	1	0.772557	96.543
GOTERM_BP_ALL	GO:0071704~organic substance metabolic process	30	56.6038	0.225661	AURKAIP1, TRA2B, COL3A1, CSPG4, ECHDC2, CNP, AFAP1L2, MYBL1, WTIP, H19, PIN1, BAK1, EIF4EBP1, POLE4, GSN, PAK4, H2AFZ, VWC2, OLIG2, SARDH, SOX10, NDUFA13, JUNB, PRKCQ, CCND1, S100B, RPS16, WRAP53, HIST1H3A, DPM3	46	10445	18082	1.12902	1	0.770671	98.6946
GOTERM_MF_ALL	GO:0000976~transcription regulatory region sequence-specific DNA binding	4	7.54717	0.230651	SOX10, H2AFZ, MYBL1, JUNB	44	674	17446	2.35312	1	0.966457	96.6551
GOTERM_BP_ALL	GO:0008152~metabolic process	31	58.4906	0.231648	CXCL1, AURKAIP1, TRA2B, COL3A1, CSPG4, ECHDC2, CNP, AFAP1L2, WTIP, MYBL1, H19, PIN1, BAK1, EIF4EBP1, POLE4, GSN, PAK4, H2AFZ, VWC2, OLIG2, SARDH, SOX10, NDUFA13, JUNB, PRKCQ, CCND1, S100B, RPS16, WRAP53, HIST1H3A, DPM3	46	10880	18082	1.12001	1	0.779623	98.8557
GOTERM_BP_ALL	GO:0044249~cellular biosynthetic process	18	33.9623	0.233929	SOX10, NDUFA13, AFAP1L2, MYBL1, WTIP, JUNB, PIN1, PRKCQ, EIF4EBP1, CCND1, S100B, RPS16, WRAP53, HIST1H3A, H2AFZ, VWC2, DPM3, OLIG2	46	5732	18082	1.2344	1	0.781223	98.912
GOTERM_MF_ALL	GO:0000981~RNA polymerase II transcription factor activity, sequence-specific DNA binding	4	7.54717	0.236568	SOX10, OLIG2, MYBL1, JUNB	44	683	17446	2.32211	1	0.957661	96.9735
GOTERM_BP_ALL	GO:0045893~positive regulation of transcription, DNA-templated	6	11.3208	0.238239	SOX10, H2AFZ, AFAP1L2, MYBL1, JUNB, PIN1	46	1339	18082	1.76141	1	0.785006	99.0113
GOTERM_BP_ALL	GO:1903508~positive regulation of nucleic acid-templated transcription	6	11.3208	0.238239	SOX10, H2AFZ, AFAP1L2, MYBL1, JUNB, PIN1	46	1339	18082	1.76141	1	0.785006	99.0113
GOTERM_BP_ALL	GO:1902680~positive regulation of RNA biosynthetic process	6	11.3208	0.240115	SOX10, H2AFZ, AFAP1L2, MYBL1, JUNB, PIN1	46	1343	18082	1.75616	1	0.785902	99.0518
GOTERM_BP_ALL	GO:0009987~cellular process	43	81.1321	0.248264	CXCL1, PHLDB1, AURKAIP1, TNFRSF12A, TRA2B, COL3A1, CSPG4, ECHDC2, OSGIN1, AFAP1L2, CNP, WTIP, MYBL1, H19, PIN1, MBP, BAK1, POLE4, EIF4EBP1, GSN, TNR, PAK4, H2AFZ, VWC2, OLIG2, SARDH, SOX10, MAG, NDUFA13, KRT10, JUNB, ITPR2, PRKCQ, ARPC1B, CCND1, RPS16, S100B, WRAP53, HIST1H3A, CCL27A, TCHP, DPM3, SST	46	16073	18082	1.05162	1	0.794425	99.2103
GOTERM_MF_ALL	GO:1990837~sequence-specific double-stranded DNA binding	4	7.54717	0.250483	SOX10, H2AFZ, MYBL1, JUNB	44	704	17446	2.25284	1	0.960205	97.6154
GOTERM_BP_ALL	GO:1901576~organic substance biosynthetic process	18	33.9623	0.258979	SOX10, NDUFA13, AFAP1L2, MYBL1, WTIP, JUNB, PIN1, PRKCQ, EIF4EBP1, CCND1, S100B, RPS16, WRAP53, HIST1H3A, H2AFZ, VWC2, DPM3, OLIG2	46	5830	18082	1.21365	1	0.80332	99.381
GOTERM_BP_ALL	GO:0045944~positive regulation of transcription from RNA polymerase II promoter	5	9.43396	0.263535	SOX10, H2AFZ, MYBL1, JUNB, PIN1	46	1049	18082	1.87363	1	0.807875	99.4425
GOTERM_BP_ALL	GO:0051276~chromosome organization	5	9.43396	0.278066	PRKCQ, POLE4, WRAP53, HIST1H3A, H2AFZ	46	1075	18082	1.82831	1	0.824706	99.6024
GOTERM_BP_ALL	GO:0009058~biosynthetic process	18	33.9623	0.284094	SOX10, NDUFA13, AFAP1L2, MYBL1, WTIP, JUNB, PIN1, PRKCQ, EIF4EBP1, CCND1, S100B, RPS16, WRAP53, HIST1H3A, H2AFZ, VWC2, DPM3, OLIG2	46	5924	18082	1.19439	1	0.828808	99.6551
GOTERM_MF_ALL	GO:0003712~transcription cofactor activity	3	5.66038	0.288353	CCND1, WTIP, JUNB	44	432	17446	2.75347	1	0.973705	98.782
GOTERM_MF_ALL	GO:0001071~nucleic acid binding transcription factor activity	5	9.43396	0.291136	SOX10, TCHP, OLIG2, MYBL1, JUNB	44	1109	17446	1.78765	1	0.970605	98.8423
GOTERM_MF_ALL	GO:0003700~transcription factor activity, sequence-specific DNA binding	5	9.43396	0.291136	SOX10, TCHP, OLIG2, MYBL1, JUNB	44	1109	17446	1.78765	1	0.970605	98.8423
GOTERM_MF_ALL	GO:0003690~double-stranded DNA binding	4	7.54717	0.306557	SOX10, H2AFZ, MYBL1, JUNB	44	787	17446	2.01525	1	0.972739	99.1294
GOTERM_MF_ALL	GO:0044212~transcription regulatory region DNA binding	4	7.54717	0.338008	SOX10, H2AFZ, MYBL1, JUNB	44	833	17446	1.90396	1	0.979817	99.5229
GOTERM_MF_ALL	GO:0000975~regulatory region DNA binding	4	7.54717	0.339376	SOX10, H2AFZ, MYBL1, JUNB	44	835	17446	1.8994	1	0.977113	99.5355
GOTERM_MF_ALL	GO:0001067~regulatory region nucleic acid binding	4	7.54717	0.341429	SOX10, H2AFZ, MYBL1, JUNB	44	838	17446	1.8926	1	0.974515	99.5539
GOTERM_CC_ALL	GO:0044427~chromosomal part	4	7.54717	0.370453	POLE4, HIST1H3A, H2AFZ, JUNB	50	871	19662	1.80592	1	0.875812	99.7891
GOTERM_CC_ALL	GO:0000785~chromatin	3	5.66038	0.373243	HIST1H3A, H2AFZ, JUNB	50	520	19662	2.26869	1	0.874327	99.8012
GOTERM_MF_ALL	GO:0003682~chromatin binding	3	5.66038	0.39575	SOX10, HIST1H3A, H2AFZ	44	551	17446	2.1588	1	0.976608	99.8538
GOTERM_MF_ALL	GO:0008134~transcription factor binding	3	5.66038	0.397505	SOX10, CCND1, JUNB	44	553	17446	2.15099	1	0.97442	99.8592
GOTERM_CC_ALL	GO:0005694~chromosome	4	7.54717	0.443014	POLE4, HIST1H3A, H2AFZ, JUNB	50	978	19662	1.60834	1	0.898352	99.9587
GOTERM_MF_ALL	GO:0003677~DNA binding	7	13.2075	0.443862	SOX10, POLE4, HIST1H3A, H2AFZ, OLIG2, MYBL1, JUNB	44	2159	17446	1.28555	1	0.983819	99.9501
GOTERM_MF_ALL	GO:0043565~sequence-specific DNA binding	4	7.54717	0.476866	SOX10, H2AFZ, MYBL1, JUNB	44	1040	17446	1.525	1	0.986537	99.9774
GOTERM_BP_ALL	GO:0043933~macromolecular complex subunit organization	7	13.2075	0.485365	ARPC1B, EIF4EBP1, POLE4, GSN, COL3A1, HIST1H3A, H2AFZ	46	2229	18082	1.23446	1	0.948792	99.9987
GOTERM_BP_ALL	GO:0006325~chromatin organization	3	5.66038	0.554119	POLE4, HIST1H3A, H2AFZ	46	739	18082	1.59575	1	0.968228	99.9999
GOTERM_BP_ALL	GO:0000122~negative regulation of transcription from RNA polymerase II promoter	3	5.66038	0.562258	CCND1, OLIG2, JUNB	46	750	18082	1.57235	1	0.969884	99.9999
GOTERM_MF_ALL	GO:0003676~nucleic acid binding	11	20.7547	0.574081	SOX10, POLE4, RPS16, WRAP53, TRA2B, HIST1H3A, H2AFZ, CNP, OLIG2, MYBL1, JUNB	44	4100	17446	1.06378	1	0.994748	99.9984
GOTERM_MF_ALL	GO:1901363~heterocyclic compound binding	15	28.3019	0.67591	SOX10, TRA2B, NDUFA13, CNP, MYBL1, JUNB, PRKCQ, POLE4, RPS16, WRAP53, PAK4, HIST1H3A, H2AFZ, OLIG2, SARDH	44	6072	17446	0.979496	1	0.997584	100
GOTERM_MF_ALL	GO:0097159~organic cyclic compound binding	15	28.3019	0.700124	SOX10, TRA2B, NDUFA13, CNP, MYBL1, JUNB, PRKCQ, POLE4, RPS16, WRAP53, PAK4, HIST1H3A, H2AFZ, OLIG2, SARDH	44	6159	17446	0.96566	1	0.998171	100
Annotation Cluster 16	Enrichment Score: 1.1800844365044558
Category	Term	Count	%	PValue	Genes	List Total	Pop Hits	Pop Total	Fold Enrichment	Bonferroni	Benjamini	FDR
GOTERM_BP_ALL	GO:1903034~regulation of response to wounding	4	7.54717	0.00734999	PRKCQ, TNFRSF12A, GSN, TNR	46	160	18082	9.82717	0.999998	0.183385	11.7637
GOTERM_BP_ALL	GO:0009611~response to wounding	6	11.3208	0.00906883	PRKCQ, MATN4, TNFRSF12A, GSN, TNR, COL3A1	46	519	18082	4.54436	1	0.202168	14.3202
GOTERM_BP_ALL	GO:0007155~cell adhesion	10	18.8679	0.0146047	MAG, PRKCQ, TNFRSF12A, GSN, TNR, PAK4, COL3A1, HIST1H3A, EFS, VWC2	46	1583	18082	2.48318	1	0.255523	22.0882
GOTERM_BP_ALL	GO:0022610~biological adhesion	10	18.8679	0.0152879	MAG, PRKCQ, TNFRSF12A, GSN, TNR, PAK4, COL3A1, HIST1H3A, EFS, VWC2	46	1595	18082	2.4645	1	0.260806	22.9997
GOTERM_BP_ALL	GO:0030030~cell projection organization	9	16.9811	0.0201859	MAG, PRKCQ, TNFRSF12A, GSN, TNR, PAK4, CSPG4, TCHP, CNP	46	1392	18082	2.54151	1	0.279588	29.2455
GOTERM_BP_ALL	GO:0061041~regulation of wound healing	3	5.66038	0.0426929	PRKCQ, TNFRSF12A, GSN	46	132	18082	8.93379	1	0.38916	52.2979
GOTERM_BP_ALL	GO:0080134~regulation of response to stress	7	13.2075	0.0732206	CXCL1, PRKCQ, BAK1, TNFRSF12A, GSN, TNR, HIST1H3A	46	1191	18082	2.31033	1	0.492701	72.473
GOTERM_MF_ALL	GO:0050839~cell adhesion molecule binding	4	7.54717	0.0973267	TNR, PAK4, COL3A1, HIST1H3A	44	447	17446	3.5481	1	0.855954	73.4682
GOTERM_BP_ALL	GO:0030155~regulation of cell adhesion	4	7.54717	0.212029	PRKCQ, GSN, TNR, VWC2	46	639	18082	2.46064	1	0.75207	98.2449
GOTERM_BP_ALL	GO:0022407~regulation of cell-cell adhesion	3	5.66038	0.24401	PRKCQ, GSN, TNR	46	380	18082	3.10332	1	0.788914	99.1309
GOTERM_BP_ALL	GO:0098609~cell-cell adhesion	5	9.43396	0.292741	PRKCQ, GSN, TNR, PAK4, HIST1H3A	46	1101	18082	1.78514	1	0.83511	99.7194
GOTERM_BP_ALL	GO:0016337~single organismal cell-cell adhesion	3	5.66038	0.553374	PRKCQ, GSN, TNR	46	738	18082	1.59791	1	0.968264	99.9999
GOTERM_BP_ALL	GO:0098602~single organism cell adhesion	3	5.66038	0.595181	PRKCQ, GSN, TNR	46	796	18082	1.48148	1	0.97637	100
Annotation Cluster 17	Enrichment Score: 1.1124815446731502
Category	Term	Count	%	PValue	Genes	List Total	Pop Hits	Pop Total	Fold Enrichment	Bonferroni	Benjamini	FDR
GOTERM_BP_ALL	GO:0009967~positive regulation of signal transduction	9	16.9811	0.0155972	PRKCQ, BAK1, S100B, TNFRSF12A, GSN, COL3A1, CSPG4, AFAP1L2, PIN1	46	1328	18082	2.66399	1	0.260458	23.4089
GOTERM_BP_ALL	GO:0009612~response to mechanical stimulus	4	7.54717	0.0199176	MAG, BAK1, COL3A1, JUNB	46	232	18082	6.77736	1	0.278535	28.9162
GOTERM_BP_ALL	GO:0048514~blood vessel morphogenesis	5	9.43396	0.0447322	BAK1, TNFRSF12A, COL3A1, CSPG4, JUNB	46	540	18082	3.63969	1	0.397928	53.9928
GOTERM_BP_ALL	GO:0001568~blood vessel development	5	9.43396	0.0744079	BAK1, TNFRSF12A, COL3A1, CSPG4, JUNB	46	641	18082	3.0662	1	0.496747	73.0652
GOTERM_BP_ALL	GO:0001944~vasculature development	5	9.43396	0.0869379	BAK1, TNFRSF12A, COL3A1, CSPG4, JUNB	46	677	18082	2.90315	1	0.528394	78.6256
GOTERM_BP_ALL	GO:0009314~response to radiation	4	7.54717	0.0902217	BAK1, CCND1, COL3A1, JUNB	46	428	18082	3.67371	1	0.535679	79.8929
GOTERM_BP_ALL	GO:0072359~circulatory system development	6	11.3208	0.122419	BAK1, TNFRSF12A, COL3A1, CSPG4, JUNB, PIN1	46	1062	18082	2.22083	1	0.615308	89.0887
GOTERM_BP_ALL	GO:0072358~cardiovascular system development	6	11.3208	0.122419	BAK1, TNFRSF12A, COL3A1, CSPG4, JUNB, PIN1	46	1062	18082	2.22083	1	0.615308	89.0887
GOTERM_BP_ALL	GO:0048646~anatomical structure formation involved in morphogenesis	6	11.3208	0.20351	PHLDB1, BAK1, TNFRSF12A, CSPG4, TCHP, JUNB	46	1263	18082	1.8674	1	0.744096	97.8936
GOTERM_BP_ALL	GO:0001525~angiogenesis	3	5.66038	0.303289	BAK1, TNFRSF12A, CSPG4	46	444	18082	2.65599	1	0.843336	99.7825
Annotation Cluster 18	Enrichment Score: 1.107932322511688
Category	Term	Count	%	PValue	Genes	List Total	Pop Hits	Pop Total	Fold Enrichment	Bonferroni	Benjamini	FDR
GOTERM_BP_ALL	GO:0009725~response to hormone	7	13.2075	0.0155596	PRKCQ, EIF4EBP1, CCND1, S100B, H2AFZ, SST, JUNB	46	822	18082	3.34746	1	0.262333	23.3593
GOTERM_BP_ALL	GO:0051384~response to glucocorticoid	3	5.66038	0.0628082	EIF4EBP1, CCND1, S100B	46	164	18082	7.19062	1	0.463408	66.7284
GOTERM_BP_ALL	GO:0048545~response to steroid hormone	4	7.54717	0.0642007	EIF4EBP1, CCND1, S100B, SST	46	370	18082	4.24959	1	0.465636	67.5571
GOTERM_BP_ALL	GO:0031960~response to corticosteroid	3	5.66038	0.0745676	EIF4EBP1, CCND1, S100B	46	181	18082	6.51525	1	0.495803	73.1439
GOTERM_BP_ALL	GO:0033554~cellular response to stress	5	9.43396	0.616926	BAK1, EIF4EBP1, CCND1, S100B, TNR	46	1690	18082	1.16298	1	0.980501	100
Annotation Cluster 19	Enrichment Score: 1.043686956380539
Category	Term	Count	%	PValue	Genes	List Total	Pop Hits	Pop Total	Fold Enrichment	Bonferroni	Benjamini	FDR
GOTERM_BP_ALL	GO:1903034~regulation of response to wounding	4	7.54717	0.00734999	PRKCQ, TNFRSF12A, GSN, TNR	46	160	18082	9.82717	0.999998	0.183385	11.7637
GOTERM_BP_ALL	GO:0022604~regulation of cell morphogenesis	6	11.3208	0.0142617	PHLDB1, S100B, TNFRSF12A, TNR, TCHP, WTIP	46	581	18082	4.05942	1	0.25276	21.627
GOTERM_BP_ALL	GO:0030198~extracellular matrix organization	4	7.54717	0.0190307	PHLDB1, GSN, TNR, COL3A1	46	228	18082	6.89626	1	0.283217	27.8169
GOTERM_BP_ALL	GO:0043062~extracellular structure organization	4	7.54717	0.0192503	PHLDB1, GSN, TNR, COL3A1	46	229	18082	6.86615	1	0.279153	28.0905
GOTERM_CC_ALL	GO:0005938~cell cortex	4	7.54717	0.0269451	PHLDB1, GSN, TCHP, ITPR2	50	260	19662	6.04985	0.999666	0.343756	30.4896
GOTERM_BP_ALL	GO:0009653~anatomical structure morphogenesis	13	24.5283	0.03252	SOX10, PHLDB1, BAK1, S100B, GSN, TNFRSF12A, TNR, COL3A1, CSPG4, TCHP, CNP, WTIP, JUNB	46	2744	18082	1.86229	1	0.354115	42.9286
GOTERM_BP_ALL	GO:0022603~regulation of anatomical structure morphogenesis	7	13.2075	0.0416372	PHLDB1, S100B, TNFRSF12A, GSN, TNR, TCHP, WTIP	46	1033	18082	2.66371	1	0.383396	51.3975
GOTERM_CC_ALL	GO:0099568~cytoplasmic region	4	7.54717	0.0433542	PHLDB1, GSN, TCHP, ITPR2	50	314	19662	5.00943	0.999998	0.393151	44.5752
GOTERM_CC_ALL	GO:0044448~cell cortex part	3	5.66038	0.0434342	PHLDB1, GSN, TCHP	50	133	19662	8.87008	0.999998	0.382381	44.6369
GOTERM_BP_ALL	GO:0044087~regulation of cellular component biogenesis	6	11.3208	0.0458861	PHLDB1, PRKCQ, ARPC1B, EIF4EBP1, GSN, TCHP	46	792	18082	2.97793	1	0.40403	54.9266
GOTERM_BP_ALL	GO:0032535~regulation of cellular component size	4	7.54717	0.0671258	ARPC1B, TNFRSF12A, GSN, TNR	46	377	18082	4.17068	1	0.474101	69.2352
GOTERM_BP_ALL	GO:0031175~neuron projection development	6	11.3208	0.0773469	MAG, TNFRSF12A, TNR, PAK4, CSPG4, CNP	46	921	18082	2.56083	1	0.503889	74.4799
GOTERM_BP_ALL	GO:0000902~cell morphogenesis	7	13.2075	0.0966995	PHLDB1, S100B, TNFRSF12A, GSN, TNR, TCHP, CNP	46	1283	18082	2.14467	1	0.552129	82.1885
GOTERM_BP_ALL	GO:0032989~cellular component morphogenesis	7	13.2075	0.126064	PHLDB1, S100B, TNFRSF12A, GSN, TNR, TCHP, CNP	46	1382	18082	1.99103	1	0.616443	89.8325
GOTERM_BP_ALL	GO:0048666~neuron development	6	11.3208	0.133359	MAG, TNFRSF12A, TNR, PAK4, CSPG4, CNP	46	1092	18082	2.15982	1	0.629949	91.1803
GOTERM_BP_ALL	GO:0090066~regulation of anatomical structure size	4	7.54717	0.148176	ARPC1B, TNFRSF12A, GSN, TNR	46	536	18082	2.93348	1	0.654996	93.4174
GOTERM_BP_ALL	GO:0048858~cell projection morphogenesis	5	9.43396	0.150502	TNFRSF12A, GSN, TNR, TCHP, CNP	46	830	18082	2.36799	1	0.659839	93.7158
GOTERM_BP_ALL	GO:0032990~cell part morphogenesis	5	9.43396	0.166139	TNFRSF12A, GSN, TNR, TCHP, CNP	46	863	18082	2.27744	1	0.684672	95.4147
GOTERM_BP_ALL	GO:0010769~regulation of cell morphogenesis involved in differentiation	3	5.66038	0.235699	PHLDB1, TNFRSF12A, TNR	46	371	18082	3.1786	1	0.781979	98.9538
GOTERM_BP_ALL	GO:0007409~axonogenesis	3	5.66038	0.281995	TNFRSF12A, TNR, CNP	46	421	18082	2.80109	1	0.827941	99.6376
GOTERM_BP_ALL	GO:0061564~axon development	3	5.66038	0.313445	TNFRSF12A, TNR, CNP	46	455	18082	2.59178	1	0.853092	99.8305
GOTERM_BP_ALL	GO:0000904~cell morphogenesis involved in differentiation	4	7.54717	0.322817	PHLDB1, TNFRSF12A, TNR, CNP	46	803	18082	1.95809	1	0.859148	99.8657
GOTERM_BP_ALL	GO:0044708~single-organism behavior	3	5.66038	0.346462	S100B, TNR, CNP	46	491	18082	2.40175	1	0.878647	99.9265
GOTERM_BP_ALL	GO:0048667~cell morphogenesis involved in neuron differentiation	3	5.66038	0.38079	TNFRSF12A, TNR, CNP	46	529	18082	2.22923	1	0.90159	99.9706
GOTERM_BP_ALL	GO:0048812~neuron projection morphogenesis	3	5.66038	0.417014	TNFRSF12A, TNR, CNP	46	570	18082	2.06888	1	0.92124	99.9894
GOTERM_BP_ALL	GO:0007610~behavior	3	5.66038	0.522115	S100B, TNR, CNP	46	697	18082	1.69191	1	0.96046	99.9996
Annotation Cluster 20	Enrichment Score: 1.041433807707085
Category	Term	Count	%	PValue	Genes	List Total	Pop Hits	Pop Total	Fold Enrichment	Bonferroni	Benjamini	FDR
GOTERM_BP_ALL	GO:0009725~response to hormone	7	13.2075	0.0155596	PRKCQ, EIF4EBP1, CCND1, S100B, H2AFZ, SST, JUNB	46	822	18082	3.34746	1	0.262333	23.3593
GOTERM_BP_ALL	GO:0071495~cellular response to endogenous stimulus	8	15.0943	0.0264387	PRKCQ, EIF4EBP1, COL3A1, H2AFZ, VWC2, JUNB, PIN1, ITPR2	46	1189	18082	2.64482	1	0.315857	36.5275
GOTERM_BP_ALL	GO:0071417~cellular response to organonitrogen compound	5	9.43396	0.0407907	PRKCQ, EIF4EBP1, COL3A1, H2AFZ, ITPR2	46	524	18082	3.75083	1	0.384838	50.6641
GOTERM_BP_ALL	GO:1901699~cellular response to nitrogen compound	5	9.43396	0.0635024	PRKCQ, EIF4EBP1, COL3A1, H2AFZ, ITPR2	46	607	18082	3.23795	1	0.46363	67.144
GOTERM_BP_ALL	GO:0032869~cellular response to insulin stimulus	3	5.66038	0.0724435	PRKCQ, EIF4EBP1, H2AFZ	46	178	18082	6.62506	1	0.492345	72.0788
GOTERM_BP_ALL	GO:0032868~response to insulin	3	5.66038	0.114244	PRKCQ, EIF4EBP1, H2AFZ	46	233	18082	5.06121	1	0.594352	87.2299
GOTERM_BP_ALL	GO:1901701~cellular response to oxygen-containing compound	6	11.3208	0.122777	PRKCQ, EIF4EBP1, COL3A1, H2AFZ, NDUFA13, ITPR2	46	1063	18082	2.21874	1	0.61495	89.1639
GOTERM_BP_ALL	GO:0071375~cellular response to peptide hormone stimulus	3	5.66038	0.126536	PRKCQ, EIF4EBP1, H2AFZ	46	248	18082	4.75508	1	0.616454	89.9254
GOTERM_BP_ALL	GO:0071407~cellular response to organic cyclic compound	4	7.54717	0.138918	EIF4EBP1, PAK4, H2AFZ, ITPR2	46	520	18082	3.02375	1	0.636243	92.0925
GOTERM_BP_ALL	GO:1901653~cellular response to peptide	3	5.66038	0.144248	PRKCQ, EIF4EBP1, H2AFZ	46	269	18082	4.38387	1	0.647045	92.8831
GOTERM_BP_ALL	GO:0032870~cellular response to hormone stimulus	4	7.54717	0.155846	PRKCQ, EIF4EBP1, H2AFZ, JUNB	46	549	18082	2.86402	1	0.672387	94.3538
GOTERM_BP_ALL	GO:0043434~response to peptide hormone	3	5.66038	0.242161	PRKCQ, EIF4EBP1, H2AFZ	46	378	18082	3.11974	1	0.787057	99.0942
GOTERM_BP_ALL	GO:1901652~response to peptide	3	5.66038	0.279214	PRKCQ, EIF4EBP1, H2AFZ	46	418	18082	2.8212	1	0.825281	99.613
Annotation Cluster 21	Enrichment Score: 1.0309253963630463
Category	Term	Count	%	PValue	Genes	List Total	Pop Hits	Pop Total	Fold Enrichment	Bonferroni	Benjamini	FDR
GOTERM_BP_ALL	GO:0043065~positive regulation of apoptotic process	7	13.2075	0.00290871	BAK1, S100B, TNFRSF12A, GSN, NDUFA13, OSGIN1, PIN1	46	577	18082	4.76882	0.994481	0.106881	4.82165
GOTERM_BP_ALL	GO:0043068~positive regulation of programmed cell death	7	13.2075	0.00303565	BAK1, S100B, TNFRSF12A, GSN, NDUFA13, OSGIN1, PIN1	46	582	18082	4.72785	0.995603	0.106903	5.02702
GOTERM_BP_ALL	GO:0001558~regulation of cell growth	6	11.3208	0.00339051	TNFRSF12A, TNR, NDUFA13, TCHP, OSGIN1, PIN1	46	410	18082	5.75249	0.997671	0.116374	5.59887
GOTERM_BP_ALL	GO:0040007~growth	9	16.9811	0.00364551	SOX10, TNFRSF12A, GSN, TNR, NDUFA13, TCHP, OSGIN1, H19, PIN1	46	1035	18082	3.41815	0.998525	0.12224	6.00782
GOTERM_BP_ALL	GO:0045926~negative regulation of growth	5	9.43396	0.00365672	TNR, NDUFA13, TCHP, OSGIN1, H19	46	255	18082	7.70759	0.998554	0.12034	6.02575
GOTERM_BP_ALL	GO:0010942~positive regulation of cell death	7	13.2075	0.00414135	BAK1, S100B, TNFRSF12A, GSN, NDUFA13, OSGIN1, PIN1	46	620	18082	4.43808	0.999393	0.126009	6.79821
GOTERM_BP_ALL	GO:0009966~regulation of signal transduction	14	26.4151	0.00574718	SOX10, PRKCQ, BAK1, CCND1, S100B, TNFRSF12A, GSN, COL3A1, CSPG4, NDUFA13, VWC2, AFAP1L2, WTIP, PIN1	46	2468	18082	2.22983	0.999966	0.165144	9.31527
GOTERM_BP_ALL	GO:0016049~cell growth	6	11.3208	0.00581972	TNFRSF12A, TNR, NDUFA13, TCHP, OSGIN1, PIN1	46	466	18082	5.06121	0.99997	0.164421	9.42746
GOTERM_BP_ALL	GO:0010646~regulation of cell communication	15	28.3019	0.0060997	SOX10, PRKCQ, BAK1, CCND1, S100B, TNFRSF12A, GSN, TNR, COL3A1, CSPG4, NDUFA13, VWC2, AFAP1L2, WTIP, PIN1	46	2785	18082	2.11716	0.999982	0.168985	9.85921
GOTERM_BP_ALL	GO:0023051~regulation of signaling	15	28.3019	0.00656728	SOX10, PRKCQ, BAK1, CCND1, S100B, TNFRSF12A, GSN, TNR, COL3A1, CSPG4, NDUFA13, VWC2, AFAP1L2, WTIP, PIN1	46	2808	18082	2.09982	0.999992	0.175359	10.5759
GOTERM_BP_ALL	GO:0040008~regulation of growth	7	13.2075	0.00683281	TNFRSF12A, TNR, NDUFA13, TCHP, OSGIN1, H19, PIN1	46	688	18082	3.99943	0.999995	0.179133	10.9806
GOTERM_BP_ALL	GO:0043085~positive regulation of catalytic activity	8	15.0943	0.00927224	PRKCQ, BAK1, CCND1, GSN, WRAP53, CSPG4, NDUFA13, PIN1	46	965	18082	3.25875	1	0.203703	14.6181
GOTERM_BP_ALL	GO:0030308~negative regulation of cell growth	4	7.54717	0.0102853	TNR, NDUFA13, TCHP, OSGIN1	46	181	18082	8.687	1	0.215588	16.0873
GOTERM_BP_ALL	GO:0006915~apoptotic process	11	20.7547	0.0106982	PRKCQ, SOX10, BAK1, S100B, TNFRSF12A, GSN, PAK4, NDUFA13, TCHP, OSGIN1, PIN1	46	1779	18082	2.43055	1	0.21575	16.6791
GOTERM_BP_ALL	GO:0012501~programmed cell death	11	20.7547	0.0148904	PRKCQ, SOX10, BAK1, S100B, TNFRSF12A, GSN, PAK4, NDUFA13, TCHP, OSGIN1, PIN1	46	1870	18082	2.31228	1	0.257363	22.4707
GOTERM_BP_ALL	GO:0009967~positive regulation of signal transduction	9	16.9811	0.0155972	PRKCQ, BAK1, S100B, TNFRSF12A, GSN, COL3A1, CSPG4, AFAP1L2, PIN1	46	1328	18082	2.66399	1	0.260458	23.4089
GOTERM_BP_ALL	GO:0051726~regulation of cell cycle	7	13.2075	0.0166045	PRKCQ, BAK1, EIF4EBP1, CCND1, AFAP1L2, JUNB, PIN1	46	834	18082	3.29929	1	0.265175	24.7277
GOTERM_BP_ALL	GO:0010638~positive regulation of organelle organization	6	11.3208	0.0167223	PRKCQ, BAK1, ARPC1B, GSN, WRAP53, CCL27A	46	605	18082	3.89838	1	0.264467	24.8804
GOTERM_BP_ALL	GO:0010941~regulation of cell death	10	18.8679	0.0167881	PRKCQ, SOX10, BAK1, S100B, TNFRSF12A, GSN, NDUFA13, OSGIN1, JUNB, PIN1	46	1620	18082	2.42646	1	0.263072	24.9658
GOTERM_BP_ALL	GO:0033043~regulation of organelle organization	8	15.0943	0.0223086	PHLDB1, PRKCQ, BAK1, ARPC1B, GSN, WRAP53, CCL27A, TCHP	46	1148	18082	2.73928	1	0.297606	31.8015
GOTERM_BP_ALL	GO:0008219~cell death	11	20.7547	0.0231302	PRKCQ, SOX10, BAK1, S100B, TNFRSF12A, GSN, PAK4, NDUFA13, TCHP, OSGIN1, PIN1	46	2003	18082	2.15874	1	0.304579	32.7672
GOTERM_BP_ALL	GO:0042981~regulation of apoptotic process	9	16.9811	0.0281938	PRKCQ, SOX10, BAK1, S100B, TNFRSF12A, GSN, NDUFA13, OSGIN1, PIN1	46	1482	18082	2.38717	1	0.330993	38.441
GOTERM_BP_ALL	GO:0045862~positive regulation of proteolysis	4	7.54717	0.0283727	BAK1, AURKAIP1, GSN, NDUFA13	46	266	18082	5.91108	1	0.33061	38.6331
GOTERM_BP_ALL	GO:0043067~regulation of programmed cell death	9	16.9811	0.0298229	PRKCQ, SOX10, BAK1, S100B, TNFRSF12A, GSN, NDUFA13, OSGIN1, PIN1	46	1498	18082	2.36167	1	0.340136	40.1685
GOTERM_BP_ALL	GO:0043280~positive regulation of cysteine-type endopeptidase activity involved in apoptotic process	3	5.66038	0.0301236	BAK1, GSN, NDUFA13	46	109	18082	10.8189	1	0.340829	40.4823
GOTERM_BP_ALL	GO:0048589~developmental growth	6	11.3208	0.0314519	SOX10, TNFRSF12A, GSN, TNR, H19, PIN1	46	714	18082	3.30325	1	0.346686	41.8502
GOTERM_BP_ALL	GO:0051130~positive regulation of cellular component organization	8	15.0943	0.0339015	PHLDB1, PRKCQ, BAK1, ARPC1B, TNFRSF12A, GSN, WRAP53, CCL27A	46	1253	18082	2.50973	1	0.357831	44.2954
GOTERM_BP_ALL	GO:0051347~positive regulation of transferase activity	5	9.43396	0.033963	PRKCQ, CCND1, WRAP53, CSPG4, PIN1	46	494	18082	3.97861	1	0.356319	44.3556
GOTERM_BP_ALL	GO:2001056~positive regulation of cysteine-type endopeptidase activity	3	5.66038	0.0353768	BAK1, GSN, NDUFA13	46	119	18082	9.90976	1	0.364128	45.7211
GOTERM_BP_ALL	GO:0044093~positive regulation of molecular function	8	15.0943	0.0361017	PRKCQ, BAK1, CCND1, GSN, WRAP53, CSPG4, NDUFA13, PIN1	46	1270	18082	2.47614	1	0.368069	46.409
GOTERM_BP_ALL	GO:0010950~positive regulation of endopeptidase activity	3	5.66038	0.0386872	BAK1, GSN, NDUFA13	46	125	18082	9.43409	1	0.374697	48.7961
GOTERM_BP_ALL	GO:0010952~positive regulation of peptidase activity	3	5.66038	0.0409576	BAK1, GSN, NDUFA13	46	129	18082	9.14156	1	0.384138	50.8095
GOTERM_BP_ALL	GO:0022603~regulation of anatomical structure morphogenesis	7	13.2075	0.0416372	PHLDB1, S100B, TNFRSF12A, GSN, TNR, TCHP, WTIP	46	1033	18082	2.66371	1	0.383396	51.3975
GOTERM_BP_ALL	GO:0048638~regulation of developmental growth	4	7.54717	0.0585363	TNFRSF12A, TNR, H19, PIN1	46	356	18082	4.41671	1	0.450182	64.0597
GOTERM_BP_ALL	GO:0051247~positive regulation of protein metabolic process	8	15.0943	0.0612343	PRKCQ, BAK1, CCND1, AURKAIP1, GSN, CSPG4, NDUFA13, PIN1	46	1428	18082	2.20217	1	0.45828	65.7676
GOTERM_CC_ALL	GO:0001726~ruffle	3	5.66038	0.0616806	S100B, TNFRSF12A, GSN	50	162	19662	7.28222	1	0.45214	57.1598
GOTERM_CC_ALL	GO:0031252~cell leading edge	4	7.54717	0.0675081	S100B, TNFRSF12A, GSN, CSPG4	50	377	19662	4.17231	1	0.472694	60.57
GOTERM_BP_ALL	GO:2001235~positive regulation of apoptotic signaling pathway	3	5.66038	0.0675675	BAK1, TNFRSF12A, GSN	46	171	18082	6.89626	1	0.47465	69.4814
GOTERM_BP_ALL	GO:2001233~regulation of apoptotic signaling pathway	4	7.54717	0.0692525	BAK1, TNFRSF12A, GSN, NDUFA13	46	382	18082	4.11609	1	0.479827	70.4037
GOTERM_BP_ALL	GO:0051246~regulation of protein metabolic process	11	20.7547	0.0808718	PRKCQ, BAK1, EIF4EBP1, CCND1, S100B, AURKAIP1, GSN, CSPG4, NDUFA13, WTIP, PIN1	46	2483	18082	1.74142	1	0.511689	76.0844
GOTERM_BP_ALL	GO:0043281~regulation of cysteine-type endopeptidase activity involved in apoptotic process	3	5.66038	0.0847394	BAK1, GSN, NDUFA13	46	195	18082	6.04749	1	0.52386	77.7355
GOTERM_BP_ALL	GO:0000902~cell morphogenesis	7	13.2075	0.0966995	PHLDB1, S100B, TNFRSF12A, GSN, TNR, TCHP, CNP	46	1283	18082	2.14467	1	0.552129	82.1885
GOTERM_BP_ALL	GO:0048588~developmental cell growth	3	5.66038	0.0999504	TNFRSF12A, TNR, PIN1	46	215	18082	5.48493	1	0.556795	83.2453
GOTERM_BP_ALL	GO:2000116~regulation of cysteine-type endopeptidase activity	3	5.66038	0.103867	BAK1, GSN, NDUFA13	46	220	18082	5.36028	1	0.568353	84.4401
GOTERM_BP_ALL	GO:0032846~positive regulation of homeostatic process	3	5.66038	0.105446	PRKCQ, BAK1, WRAP53	46	222	18082	5.31199	1	0.572588	84.8986
GOTERM_BP_ALL	GO:0051345~positive regulation of hydrolase activity	4	7.54717	0.109327	BAK1, GSN, NDUFA13, PIN1	46	466	18082	3.37414	1	0.583425	85.9724
GOTERM_BP_ALL	GO:0032270~positive regulation of cellular protein metabolic process	7	13.2075	0.111308	BAK1, CCND1, AURKAIP1, GSN, CSPG4, NDUFA13, PIN1	46	1334	18082	2.06268	1	0.587301	86.4926
GOTERM_BP_ALL	GO:0050790~regulation of catalytic activity	8	15.0943	0.114892	PRKCQ, BAK1, CCND1, GSN, WRAP53, CSPG4, NDUFA13, PIN1	46	1662	18082	1.89212	1	0.595034	87.3876
GOTERM_BP_ALL	GO:0097191~extrinsic apoptotic signaling pathway	3	5.66038	0.115053	BAK1, TNFRSF12A, NDUFA13	46	234	18082	5.03958	1	0.594062	87.4264
GOTERM_BP_ALL	GO:0051338~regulation of transferase activity	5	9.43396	0.124142	PRKCQ, CCND1, WRAP53, CSPG4, PIN1	46	771	18082	2.5492	1	0.614821	89.4465
GOTERM_BP_ALL	GO:0032989~cellular component morphogenesis	7	13.2075	0.126064	PHLDB1, S100B, TNFRSF12A, GSN, TNR, TCHP, CNP	46	1382	18082	1.99103	1	0.616443	89.8325
GOTERM_BP_ALL	GO:0035556~intracellular signal transduction	10	18.8679	0.129496	PRKCQ, BAK1, EIF4EBP1, S100B, GSN, COL3A1, CSPG4, NDUFA13, WTIP, PIN1	46	2380	18082	1.65163	1	0.621212	90.4891
GOTERM_BP_ALL	GO:0052548~regulation of endopeptidase activity	3	5.66038	0.139133	BAK1, GSN, NDUFA13	46	263	18082	4.48388	1	0.635465	92.1259
GOTERM_BP_ALL	GO:1903827~regulation of cellular protein localization	4	7.54717	0.159429	PRKCQ, GSN, WRAP53, PIN1	46	555	18082	2.83306	1	0.676093	94.7468
GOTERM_BP_ALL	GO:0061024~membrane organization	5	9.43396	0.165174	BAK1, GSN, NDUFA13, CNP, MBP	46	861	18082	2.28273	1	0.683645	95.3239
GOTERM_BP_ALL	GO:0060341~regulation of cellular localization	5	9.43396	0.166622	PRKCQ, BAK1, GSN, WRAP53, PIN1	46	864	18082	2.27481	1	0.683249	95.4595
GOTERM_BP_ALL	GO:0097190~apoptotic signaling pathway	4	7.54717	0.175865	BAK1, TNFRSF12A, GSN, NDUFA13	46	582	18082	2.70163	1	0.699704	96.2423
GOTERM_BP_ALL	GO:0030162~regulation of proteolysis	4	7.54717	0.196584	BAK1, AURKAIP1, GSN, NDUFA13	46	615	18082	2.55666	1	0.734045	97.5603
GOTERM_BP_ALL	GO:0032268~regulation of cellular protein metabolic process	9	16.9811	0.206182	BAK1, EIF4EBP1, CCND1, AURKAIP1, GSN, CSPG4, NDUFA13, WTIP, PIN1	46	2298	18082	1.53951	1	0.745714	98.0103
GOTERM_BP_ALL	GO:0051179~localization	18	33.9623	0.207547	CXCL1, SOX10, TNFRSF12A, COL3A1, CSPG4, NDUFA13, CNP, ITPR2, PIN1, BAK1, PRKCQ, CCND1, TMED3, GSN, TNR, WRAP53, CCL27A, SST	46	5623	18082	1.25833	1	0.745994	98.0676
GOTERM_BP_ALL	GO:0052547~regulation of peptidase activity	3	5.66038	0.220059	BAK1, GSN, NDUFA13	46	354	18082	3.33125	1	0.763164	98.5248
GOTERM_BP_ALL	GO:0044267~cellular protein metabolic process	15	28.3019	0.238808	PRKCQ, BAK1, CCND1, EIF4EBP1, POLE4, RPS16, AURKAIP1, GSN, PAK4, COL3A1, CSPG4, NDUFA13, DPM3, WTIP, PIN1	46	4608	18082	1.27958	1	0.784869	99.0237
GOTERM_BP_ALL	GO:0032879~regulation of localization	9	16.9811	0.289371	CXCL1, PRKCQ, BAK1, GSN, WRAP53, COL3A1, CCL27A, SST, PIN1	46	2530	18082	1.39833	1	0.832733	99.6958
GOTERM_BP_ALL	GO:0019538~protein metabolic process	16	30.1887	0.293801	AURKAIP1, COL3A1, CSPG4, NDUFA13, WTIP, PIN1, BAK1, PRKCQ, POLE4, EIF4EBP1, CCND1, S100B, RPS16, GSN, PAK4, DPM3	46	5186	18082	1.21276	1	0.835529	99.7264
GOTERM_BP_ALL	GO:0065009~regulation of molecular function	8	15.0943	0.304576	PRKCQ, BAK1, CCND1, GSN, WRAP53, CSPG4, NDUFA13, PIN1	46	2201	18082	1.42876	1	0.843984	99.7892
GOTERM_BP_ALL	GO:0032844~regulation of homeostatic process	3	5.66038	0.345551	PRKCQ, BAK1, WRAP53	46	490	18082	2.40665	1	0.878519	99.9248
GOTERM_CC_ALL	GO:0005829~cytosol	7	13.2075	0.386005	BAK1, EIF4EBP1, CCND1, RPS16, GSN, WTIP, PIN1	50	2011	19662	1.36881	1	0.873972	99.8488
GOTERM_BP_ALL	GO:0051336~regulation of hydrolase activity	4	7.54717	0.386867	BAK1, GSN, NDUFA13, PIN1	46	896	18082	1.75485	1	0.904971	99.9751
GOTERM_BP_ALL	GO:0072594~establishment of protein localization to organelle	3	5.66038	0.391488	PRKCQ, WRAP53, NDUFA13	46	541	18082	2.17978	1	0.906594	99.9781
GOTERM_BP_ALL	GO:0043066~negative regulation of apoptotic process	4	7.54717	0.41412	PRKCQ, SOX10, NDUFA13, PIN1	46	936	18082	1.67986	1	0.919917	99.9885
GOTERM_BP_ALL	GO:0043069~negative regulation of programmed cell death	4	7.54717	0.424258	PRKCQ, SOX10, NDUFA13, PIN1	46	951	18082	1.65336	1	0.925234	99.9914
GOTERM_BP_ALL	GO:0032269~negative regulation of cellular protein metabolic process	4	7.54717	0.427626	BAK1, EIF4EBP1, WTIP, PIN1	46	956	18082	1.64472	1	0.926764	99.9923
GOTERM_BP_ALL	GO:0032880~regulation of protein localization	4	7.54717	0.45698	PRKCQ, GSN, WRAP53, PIN1	46	1000	18082	1.57235	1	0.938429	99.9968
GOTERM_BP_ALL	GO:0051248~negative regulation of protein metabolic process	4	7.54717	0.466202	BAK1, EIF4EBP1, WTIP, PIN1	46	1014	18082	1.55064	1	0.942224	99.9976
GOTERM_BP_ALL	GO:0060548~negative regulation of cell death	4	7.54717	0.484454	PRKCQ, SOX10, NDUFA13, PIN1	46	1042	18082	1.50897	1	0.948768	99.9987
GOTERM_BP_ALL	GO:0046649~lymphocyte activation	3	5.66038	0.511126	PRKCQ, BAK1, GSN	46	683	18082	1.72659	1	0.957326	99.9995
GOTERM_BP_ALL	GO:0034613~cellular protein localization	5	9.43396	0.51948	PRKCQ, GSN, WRAP53, NDUFA13, PIN1	46	1500	18082	1.31029	1	0.959815	99.9996
GOTERM_BP_ALL	GO:0070727~cellular macromolecule localization	5	9.43396	0.52595	PRKCQ, GSN, WRAP53, NDUFA13, PIN1	46	1512	18082	1.29989	1	0.961523	99.9997
GOTERM_BP_ALL	GO:0006508~proteolysis	5	9.43396	0.549341	PRKCQ, BAK1, AURKAIP1, GSN, NDUFA13	46	1556	18082	1.26313	1	0.967556	99.9999
GOTERM_BP_ALL	GO:0033365~protein localization to organelle	3	5.66038	0.59239	PRKCQ, WRAP53, NDUFA13	46	792	18082	1.48897	1	0.976106	100
GOTERM_BP_ALL	GO:0045321~leukocyte activation	3	5.66038	0.597958	PRKCQ, BAK1, GSN	46	800	18082	1.47408	1	0.976833	100
GOTERM_BP_ALL	GO:0001775~cell activation	3	5.66038	0.67842	PRKCQ, BAK1, GSN	46	926	18082	1.2735	1	0.989224	100
GOTERM_BP_ALL	GO:0051641~cellular localization	6	11.3208	0.697611	PRKCQ, BAK1, GSN, WRAP53, NDUFA13, PIN1	46	2310	18082	1.02101	1	0.991114	100
GOTERM_BP_ALL	GO:0008104~protein localization	6	11.3208	0.718782	PRKCQ, TMED3, GSN, WRAP53, NDUFA13, PIN1	46	2367	18082	0.996418	1	0.99318	100
GOTERM_BP_ALL	GO:0055085~transmembrane transport	3	5.66038	0.719983	BAK1, NDUFA13, ITPR2	46	1001	18082	1.17808	1	0.99322	100
GOTERM_BP_ALL	GO:0044765~single-organism transport	7	13.2075	0.814381	CXCL1, PRKCQ, BAK1, CCND1, GSN, NDUFA13, ITPR2	46	3128	18082	0.87967	1	0.998399	100
GOTERM_BP_ALL	GO:0051234~establishment of localization	10	18.8679	0.816075	CXCL1, PRKCQ, BAK1, CCND1, TMED3, GSN, WRAP53, NDUFA13, CNP, ITPR2	46	4467	18082	0.87998	1	0.998432	100
GOTERM_BP_ALL	GO:0033036~macromolecule localization	6	11.3208	0.82364	PRKCQ, TMED3, GSN, WRAP53, NDUFA13, PIN1	46	2705	18082	0.871912	1	0.998607	100
GOTERM_BP_ALL	GO:1902578~single-organism localization	7	13.2075	0.859556	CXCL1, PRKCQ, BAK1, CCND1, GSN, NDUFA13, ITPR2	46	3325	18082	0.827551	1	0.999384	100
GOTERM_BP_ALL	GO:0045184~establishment of protein localization	4	7.54717	0.863977	PRKCQ, TMED3, WRAP53, NDUFA13	46	1894	18082	0.830173	1	0.999436	100
GOTERM_BP_ALL	GO:0006810~transport	9	16.9811	0.875782	CXCL1, PRKCQ, BAK1, CCND1, TMED3, GSN, NDUFA13, CNP, ITPR2	46	4325	18082	0.817984	1	0.999592	100
GOTERM_BP_ALL	GO:0051649~establishment of localization in cell	3	5.66038	0.93672	PRKCQ, BAK1, NDUFA13	46	1722	18082	0.68482	1	0.999963	100
GOTERM_BP_ALL	GO:0015031~protein transport	3	5.66038	0.938251	PRKCQ, TMED3, NDUFA13	46	1733	18082	0.680474	1	0.999965	100
GOTERM_BP_ALL	GO:0071702~organic substance transport	3	5.66038	0.989287	PRKCQ, TMED3, NDUFA13	46	2476	18082	0.476277	1	1	100
Annotation Cluster 22	Enrichment Score: 0.9895543880971808
Category	Term	Count	%	PValue	Genes	List Total	Pop Hits	Pop Total	Fold Enrichment	Bonferroni	Benjamini	FDR
GOTERM_BP_ALL	GO:0048585~negative regulation of response to stimulus	9	16.9811	0.0170776	PRKCQ, SOX10, CCND1, TNR, COL3A1, NDUFA13, VWC2, WTIP, PIN1	46	1350	18082	2.62058	1	0.264694	25.3396
GOTERM_BP_ALL	GO:0010648~negative regulation of cell communication	8	15.0943	0.0234668	PRKCQ, SOX10, CCND1, TNR, NDUFA13, VWC2, WTIP, PIN1	46	1160	18082	2.71094	1	0.303918	33.1592
GOTERM_BP_ALL	GO:0023057~negative regulation of signaling	8	15.0943	0.0238621	PRKCQ, SOX10, CCND1, TNR, NDUFA13, VWC2, WTIP, PIN1	46	1164	18082	2.70163	1	0.301802	33.6167
GOTERM_BP_ALL	GO:0009968~negative regulation of signal transduction	7	13.2075	0.0403265	PRKCQ, SOX10, CCND1, NDUFA13, VWC2, WTIP, PIN1	46	1025	18082	2.6845	1	0.383308	50.2575
GOTERM_BP_ALL	GO:0060070~canonical Wnt signaling pathway	3	5.66038	0.107826	SOX10, CCND1, PIN1	46	225	18082	5.24116	1	0.579633	85.566
GOTERM_BP_ALL	GO:0030111~regulation of Wnt signaling pathway	3	5.66038	0.124052	SOX10, CCND1, PIN1	46	245	18082	4.81331	1	0.616023	89.4282
GOTERM_BP_ALL	GO:0006366~transcription from RNA polymerase II promoter	8	15.0943	0.125464	SOX10, CCND1, H2AFZ, VWC2, OLIG2, MYBL1, JUNB, PIN1	46	1700	18082	1.84982	1	0.616033	89.7134
GOTERM_BP_ALL	GO:0006357~regulation of transcription from RNA polymerase II promoter	8	15.0943	0.147469	SOX10, CCND1, H2AFZ, VWC2, OLIG2, MYBL1, JUNB, PIN1	46	1774	18082	1.77266	1	0.65446	93.3241
GOTERM_BP_ALL	GO:0007267~cell-cell signaling	6	11.3208	0.217453	SOX10, CCND1, S100B, TNR, SST, PIN1	46	1294	18082	1.82266	1	0.759656	98.4389
GOTERM_BP_ALL	GO:0016055~Wnt signaling pathway	3	5.66038	0.253262	SOX10, CCND1, PIN1	46	390	18082	3.02375	1	0.797913	99.2948
GOTERM_BP_ALL	GO:0198738~cell-cell signaling by wnt	3	5.66038	0.254188	SOX10, CCND1, PIN1	46	391	18082	3.01601	1	0.797306	99.3095
GOTERM_BP_ALL	GO:1902532~negative regulation of intracellular signal transduction	3	5.66038	0.317131	NDUFA13, WTIP, PIN1	46	459	18082	2.5692	1	0.855483	99.8453
GOTERM_BP_ALL	GO:1905114~cell surface receptor signaling pathway involved in cell-cell signaling	3	5.66038	0.322654	SOX10, CCND1, PIN1	46	465	18082	2.53604	1	0.859756	99.8652
Annotation Cluster 23	Enrichment Score: 0.9677499023166819
Category	Term	Count	%	PValue	Genes	List Total	Pop Hits	Pop Total	Fold Enrichment	Bonferroni	Benjamini	FDR
GOTERM_CC_ALL	GO:0043209~myelin sheath	5	9.43396	0.00197057	MAG, GSN, CNP, MBP, ITPR2	50	214	19662	9.18785	0.438951	0.250968	2.59219
GOTERM_CC_ALL	GO:0042995~cell projection	10	18.8679	0.0760429	MAG, S100B, TNFRSF12A, GSN, CSPG4, TCHP, CNP, MBP, PIN1, ITPR2	50	2120	19662	1.85491	1	0.484229	65.1135
GOTERM_CC_ALL	GO:0097458~neuron part	6	11.3208	0.378625	MAG, S100B, SST, MBP, PIN1, ITPR2	50	1620	19662	1.45644	1	0.875173	99.8228
GOTERM_CC_ALL	GO:0030424~axon	3	5.66038	0.417514	MAG, MBP, ITPR2	50	570	19662	2.06968	1	0.882332	99.925
GOTERM_CC_ALL	GO:0043005~neuron projection	4	7.54717	0.611956	MAG, MBP, PIN1, ITPR2	50	1253	19662	1.25536	1	0.963189	99.9997
Annotation Cluster 24	Enrichment Score: 0.9524645844416113
Category	Term	Count	%	PValue	Genes	List Total	Pop Hits	Pop Total	Fold Enrichment	Bonferroni	Benjamini	FDR
GOTERM_CC_ALL	GO:0005912~adherens junction	7	13.2075	0.00708225	ARPC1B, RPS16, GSN, PAK4, HIST1H3A, CSPG4, WTIP	50	690	19662	3.98939	0.87538	0.257326	9.02951
GOTERM_BP_ALL	GO:0051495~positive regulation of cytoskeleton organization	4	7.54717	0.0127442	PRKCQ, ARPC1B, GSN, CCL27A	46	196	18082	8.02218	1	0.236122	19.5547
GOTERM_BP_ALL	GO:0010638~positive regulation of organelle organization	6	11.3208	0.0167223	PRKCQ, BAK1, ARPC1B, GSN, WRAP53, CCL27A	46	605	18082	3.89838	1	0.264467	24.8804
GOTERM_BP_ALL	GO:0007010~cytoskeleton organization	8	15.0943	0.0197639	PHLDB1, PRKCQ, ARPC1B, GSN, CCL27A, KRT10, CNP, WTIP	46	1120	18082	2.80776	1	0.278842	28.7267
GOTERM_BP_ALL	GO:0033043~regulation of organelle organization	8	15.0943	0.0223086	PHLDB1, PRKCQ, BAK1, ARPC1B, GSN, WRAP53, CCL27A, TCHP	46	1148	18082	2.73928	1	0.297606	31.8015
GOTERM_BP_ALL	GO:0051493~regulation of cytoskeleton organization	5	9.43396	0.0238455	PHLDB1, PRKCQ, ARPC1B, GSN, CCL27A	46	442	18082	4.44669	1	0.303728	33.5975
GOTERM_BP_ALL	GO:0051130~positive regulation of cellular component organization	8	15.0943	0.0339015	PHLDB1, PRKCQ, BAK1, ARPC1B, TNFRSF12A, GSN, WRAP53, CCL27A	46	1253	18082	2.50973	1	0.357831	44.2954
GOTERM_BP_ALL	GO:0032956~regulation of actin cytoskeleton organization	4	7.54717	0.0410686	PRKCQ, ARPC1B, GSN, CCL27A	46	308	18082	5.10503	1	0.383032	50.906
GOTERM_BP_ALL	GO:0044087~regulation of cellular component biogenesis	6	11.3208	0.0458861	PHLDB1, PRKCQ, ARPC1B, EIF4EBP1, GSN, TCHP	46	792	18082	2.97793	1	0.40403	54.9266
GOTERM_BP_ALL	GO:0006996~organelle organization	15	28.3019	0.0522279	PHLDB1, NDUFA13, CNP, KRT10, WTIP, ARPC1B, BAK1, PRKCQ, POLE4, GSN, WRAP53, HIST1H3A, CCL27A, H2AFZ, TCHP	46	3620	18082	1.62881	1	0.425046	59.7481
GOTERM_BP_ALL	GO:0032970~regulation of actin filament-based process	4	7.54717	0.0542629	PRKCQ, ARPC1B, GSN, CCL27A	46	345	18082	4.55753	1	0.432112	61.1895
GOTERM_BP_ALL	GO:1902589~single-organism organelle organization	9	16.9811	0.0586114	PRKCQ, BAK1, ARPC1B, GSN, CCL27A, NDUFA13, TCHP, KRT10, CNP	46	1714	18082	2.06405	1	0.448796	64.1083
GOTERM_BP_ALL	GO:0044089~positive regulation of cellular component biogenesis	4	7.54717	0.0975803	PHLDB1, PRKCQ, ARPC1B, GSN	46	443	18082	3.54932	1	0.553976	82.4808
GOTERM_BP_ALL	GO:0030036~actin cytoskeleton organization	4	7.54717	0.16123	PRKCQ, ARPC1B, GSN, CCL27A	46	558	18082	2.81783	1	0.677929	94.9346
GOTERM_BP_ALL	GO:0060341~regulation of cellular localization	5	9.43396	0.166622	PRKCQ, BAK1, GSN, WRAP53, PIN1	46	864	18082	2.27481	1	0.683249	95.4595
GOTERM_BP_ALL	GO:0007015~actin filament organization	3	5.66038	0.203616	PRKCQ, ARPC1B, GSN	46	336	18082	3.5097	1	0.743132	97.8984
GOTERM_BP_ALL	GO:0030029~actin filament-based process	4	7.54717	0.223136	PRKCQ, ARPC1B, GSN, CCL27A	46	656	18082	2.39687	1	0.767429	98.6205
GOTERM_BP_ALL	GO:0043254~regulation of protein complex assembly	3	5.66038	0.232933	ARPC1B, EIF4EBP1, GSN	46	368	18082	3.20451	1	0.780662	98.8877
GOTERM_BP_ALL	GO:0044085~cellular component biogenesis	9	16.9811	0.337399	PHLDB1, PRKCQ, ARPC1B, EIF4EBP1, RPS16, GSN, WRAP53, HIST1H3A, TCHP	46	2654	18082	1.333	1	0.873016	99.9072
GOTERM_BP_ALL	GO:0022607~cellular component assembly	8	15.0943	0.396432	PHLDB1, PRKCQ, ARPC1B, EIF4EBP1, GSN, WRAP53, HIST1H3A, TCHP	46	2418	18082	1.30054	1	0.909002	99.9809
GOTERM_BP_ALL	GO:0071822~protein complex subunit organization	5	9.43396	0.472106	ARPC1B, EIF4EBP1, GSN, COL3A1, HIST1H3A	46	1414	18082	1.38998	1	0.944664	99.998
GOTERM_BP_ALL	GO:0043933~macromolecular complex subunit organization	7	13.2075	0.485365	ARPC1B, EIF4EBP1, POLE4, GSN, COL3A1, HIST1H3A, H2AFZ	46	2229	18082	1.23446	1	0.948792	99.9987
GOTERM_BP_ALL	GO:0006461~protein complex assembly	4	7.54717	0.624882	ARPC1B, EIF4EBP1, GSN, HIST1H3A	46	1277	18082	1.23128	1	0.981777	100
GOTERM_BP_ALL	GO:0070271~protein complex biogenesis	4	7.54717	0.625424	ARPC1B, EIF4EBP1, GSN, HIST1H3A	46	1278	18082	1.23032	1	0.98155	100
GOTERM_BP_ALL	GO:0034622~cellular macromolecular complex assembly	3	5.66038	0.654962	ARPC1B, GSN, HIST1H3A	46	887	18082	1.32949	1	0.986263	100
GOTERM_BP_ALL	GO:0051641~cellular localization	6	11.3208	0.697611	PRKCQ, BAK1, GSN, WRAP53, NDUFA13, PIN1	46	2310	18082	1.02101	1	0.991114	100
GOTERM_BP_ALL	GO:0065003~macromolecular complex assembly	4	7.54717	0.751197	ARPC1B, EIF4EBP1, GSN, HIST1H3A	46	1544	18082	1.01836	1	0.995475	100
Annotation Cluster 25	Enrichment Score: 0.9519798644367717
Category	Term	Count	%	PValue	Genes	List Total	Pop Hits	Pop Total	Fold Enrichment	Bonferroni	Benjamini	FDR
GOTERM_BP_ALL	GO:0007167~enzyme linked receptor protein signaling pathway	7	13.2075	0.0157305	PRKCQ, EIF4EBP1, COL3A1, CSPG4, VWC2, AFAP1L2, PIN1	46	824	18082	3.33933	1	0.257637	23.5846
GOTERM_BP_ALL	GO:0071495~cellular response to endogenous stimulus	8	15.0943	0.0264387	PRKCQ, EIF4EBP1, COL3A1, H2AFZ, VWC2, JUNB, PIN1, ITPR2	46	1189	18082	2.64482	1	0.315857	36.5275
GOTERM_BP_ALL	GO:0007178~transmembrane receptor protein serine/threonine kinase signaling pathway	3	5.66038	0.204526	COL3A1, VWC2, PIN1	46	337	18082	3.49929	1	0.743714	97.9387
GOTERM_BP_ALL	GO:0071363~cellular response to growth factor stimulus	3	5.66038	0.442026	COL3A1, VWC2, PIN1	46	599	18082	1.96872	1	0.932663	99.995
GOTERM_BP_ALL	GO:0070848~response to growth factor	3	5.66038	0.462299	COL3A1, VWC2, PIN1	46	623	18082	1.89287	1	0.940708	99.9973
Annotation Cluster 26	Enrichment Score: 0.8655715413139715
Category	Term	Count	%	PValue	Genes	List Total	Pop Hits	Pop Total	Fold Enrichment	Bonferroni	Benjamini	FDR
GOTERM_BP_ALL	GO:0010035~response to inorganic substance	5	9.43396	0.0494163	BAK1, CCND1, GSN, KRT10, JUNB	46	558	18082	3.52228	1	0.418236	57.6738
GOTERM_BP_ALL	GO:0009888~tissue development	9	16.9811	0.092071	SOX10, BAK1, CCND1, S100B, GSN, COL3A1, KRT10, JUNB, PIN1	46	1889	18082	1.87283	1	0.541659	80.5752
GOTERM_BP_ALL	GO:0060429~epithelium development	4	7.54717	0.556278	SOX10, BAK1, CCND1, KRT10	46	1157	18082	1.35899	1	0.968621	99.9999
Annotation Cluster 27	Enrichment Score: 0.8159533414058684
Category	Term	Count	%	PValue	Genes	List Total	Pop Hits	Pop Total	Fold Enrichment	Bonferroni	Benjamini	FDR
GOTERM_BP_ALL	GO:0042127~regulation of cell proliferation	9	16.9811	0.0475456	CXCL1, PRKCQ, SOX10, BAK1, CCND1, S100B, JUNB, H19, PIN1	46	1642	18082	2.15456	1	0.409619	56.2382
GOTERM_BP_ALL	GO:0008283~cell proliferation	9	16.9811	0.0888313	CXCL1, PRKCQ, SOX10, BAK1, CCND1, S100B, CSPG4, JUNB, H19	46	1874	18082	1.88782	1	0.533134	79.3652
GOTERM_BP_ALL	GO:0008284~positive regulation of cell proliferation	5	9.43396	0.206339	CXCL1, PRKCQ, SOX10, CCND1, S100B	46	943	18082	2.08424	1	0.744858	98.017
GOTERM_BP_ALL	GO:0042592~homeostatic process	5	9.43396	0.62507	CXCL1, PRKCQ, BAK1, S100B, WRAP53	46	1707	18082	1.1514	1	0.981647	100
Annotation Cluster 28	Enrichment Score: 0.7832058853784066
Category	Term	Count	%	PValue	Genes	List Total	Pop Hits	Pop Total	Fold Enrichment	Bonferroni	Benjamini	FDR
GOTERM_CC_ALL	GO:0070161~anchoring junction	8	15.0943	0.00175466	ARPC1B, RPS16, GSN, PAK4, HIST1H3A, CSPG4, TCHP, WTIP	50	708	19662	4.44339	0.40224	0.40224	2.31123
GOTERM_CC_ALL	GO:0044421~extracellular region part	16	30.1887	0.0503015	CXCL1, COL3A1, CSPG4, NDUFA13, CNP, KRT10, ARPC1B, S100B, RPS16, GSN, TNR, HIST1H3A, CCL27A, H2AFZ, VWC2, SST	50	3920	19662	1.60506	1	0.406338	49.7013
GOTERM_CC_ALL	GO:0005576~extracellular region	17	32.0755	0.0752081	CXCL1, MATN4, COL3A1, CSPG4, NDUFA13, CNP, KRT10, ARPC1B, S100B, RPS16, GSN, TNR, HIST1H3A, CCL27A, H2AFZ, VWC2, SST	50	4493	19662	1.48789	1	0.490224	64.6915
GOTERM_CC_ALL	GO:0070062~extracellular exosome	9	16.9811	0.347211	ARPC1B, RPS16, GSN, HIST1H3A, CSPG4, H2AFZ, NDUFA13, KRT10, CNP	50	2674	19662	1.32355	1	0.875412	99.6582
GOTERM_CC_ALL	GO:1903561~extracellular vesicle	9	16.9811	0.353136	ARPC1B, RPS16, GSN, HIST1H3A, CSPG4, H2AFZ, NDUFA13, KRT10, CNP	50	2689	19662	1.31616	1	0.876609	99.6973
GOTERM_CC_ALL	GO:0031988~membrane-bounded vesicle	11	20.7547	0.355698	ARPC1B, RPS16, TMED3, GSN, HIST1H3A, CSPG4, H2AFZ, NDUFA13, KRT10, CNP, ITPR2	50	3455	19662	1.25199	1	0.874745	99.7129
GOTERM_CC_ALL	GO:0043230~extracellular organelle	9	16.9811	0.355907	ARPC1B, RPS16, GSN, HIST1H3A, CSPG4, H2AFZ, NDUFA13, KRT10, CNP	50	2696	19662	1.31274	1	0.870741	99.7141
GOTERM_CC_ALL	GO:0031982~vesicle	11	20.7547	0.416695	ARPC1B, RPS16, TMED3, GSN, HIST1H3A, CSPG4, H2AFZ, NDUFA13, KRT10, CNP, ITPR2	50	3624	19662	1.19361	1	0.885085	99.9236
GOTERM_CC_ALL	GO:0043232~intracellular non-membrane-bounded organelle	11	20.7547	0.585553	ARPC1B, POLE4, RPS16, GSN, HIST1H3A, H2AFZ, TCHP, KRT10, WTIP, CCDC106, JUNB	50	4096	19662	1.05606	1	0.955371	99.9992
GOTERM_CC_ALL	GO:0043228~non-membrane-bounded organelle	11	20.7547	0.585553	ARPC1B, POLE4, RPS16, GSN, HIST1H3A, H2AFZ, TCHP, KRT10, WTIP, CCDC106, JUNB	50	4096	19662	1.05606	1	0.955371	99.9992
Annotation Cluster 29	Enrichment Score: 0.7769456932191539
Category	Term	Count	%	PValue	Genes	List Total	Pop Hits	Pop Total	Fold Enrichment	Bonferroni	Benjamini	FDR
GOTERM_BP_ALL	GO:0009725~response to hormone	7	13.2075	0.0155596	PRKCQ, EIF4EBP1, CCND1, S100B, H2AFZ, SST, JUNB	46	822	18082	3.34746	1	0.262333	23.3593
GOTERM_BP_ALL	GO:0007167~enzyme linked receptor protein signaling pathway	7	13.2075	0.0157305	PRKCQ, EIF4EBP1, COL3A1, CSPG4, VWC2, AFAP1L2, PIN1	46	824	18082	3.33933	1	0.257637	23.5846
GOTERM_BP_ALL	GO:0051726~regulation of cell cycle	7	13.2075	0.0166045	PRKCQ, BAK1, EIF4EBP1, CCND1, AFAP1L2, JUNB, PIN1	46	834	18082	3.29929	1	0.265175	24.7277
GOTERM_BP_ALL	GO:0007346~regulation of mitotic cell cycle	4	7.54717	0.0863987	PRKCQ, EIF4EBP1, CCND1, AFAP1L2	46	420	18082	3.74369	1	0.527731	78.4104
GOTERM_BP_ALL	GO:0007169~transmembrane receptor protein tyrosine kinase signaling pathway	4	7.54717	0.129317	PRKCQ, EIF4EBP1, CSPG4, AFAP1L2	46	503	18082	3.12594	1	0.622112	90.4559
GOTERM_BP_ALL	GO:0044772~mitotic cell cycle phase transition	3	5.66038	0.186439	PRKCQ, EIF4EBP1, CCND1	46	317	18082	3.72007	1	0.715499	96.9815
GOTERM_BP_ALL	GO:0006954~inflammatory response	4	7.54717	0.195311	CXCL1, PRKCQ, CSPG4, AFAP1L2	46	613	18082	2.565	1	0.732682	97.4939
GOTERM_BP_ALL	GO:0044770~cell cycle phase transition	3	5.66038	0.216393	PRKCQ, EIF4EBP1, CCND1	46	350	18082	3.36932	1	0.758877	98.4027
GOTERM_BP_ALL	GO:0007049~cell cycle	6	11.3208	0.286832	PRKCQ, EIF4EBP1, CCND1, PAK4, AFAP1L2, PIN1	46	1440	18082	1.63786	1	0.831351	99.6768
GOTERM_BP_ALL	GO:0006468~protein phosphorylation	6	11.3208	0.437095	PRKCQ, BAK1, CCND1, PAK4, CSPG4, PIN1	46	1737	18082	1.35781	1	0.930349	99.9942
GOTERM_BP_ALL	GO:0006952~defense response	5	9.43396	0.509161	CXCL1, PRKCQ, HIST1H3A, CSPG4, AFAP1L2	46	1481	18082	1.3271	1	0.9569	99.9994
GOTERM_BP_ALL	GO:1903047~mitotic cell cycle process	3	5.66038	0.526001	PRKCQ, EIF4EBP1, CCND1	46	702	18082	1.67986	1	0.961234	99.9997
GOTERM_BP_ALL	GO:0022402~cell cycle process	4	7.54717	0.526961	PRKCQ, EIF4EBP1, CCND1, PIN1	46	1109	18082	1.41781	1	0.961269	99.9997
GOTERM_BP_ALL	GO:0000278~mitotic cell cycle	3	5.66038	0.588882	PRKCQ, EIF4EBP1, CCND1	46	787	18082	1.49843	1	0.975451	100
GOTERM_BP_ALL	GO:0016310~phosphorylation	6	11.3208	0.594743	PRKCQ, BAK1, CCND1, PAK4, CSPG4, PIN1	46	2063	18082	1.14325	1	0.97647	100
Annotation Cluster 30	Enrichment Score: 0.7574609737498124
Category	Term	Count	%	PValue	Genes	List Total	Pop Hits	Pop Total	Fold Enrichment	Bonferroni	Benjamini	FDR
GOTERM_BP_ALL	GO:0030030~cell projection organization	9	16.9811	0.0201859	MAG, PRKCQ, TNFRSF12A, GSN, TNR, PAK4, CSPG4, TCHP, CNP	46	1392	18082	2.54151	1	0.279588	29.2455
GOTERM_CC_ALL	GO:0042995~cell projection	10	18.8679	0.0760429	MAG, S100B, TNFRSF12A, GSN, CSPG4, TCHP, CNP, MBP, PIN1, ITPR2	50	2120	19662	1.85491	1	0.484229	65.1135
GOTERM_CC_ALL	GO:0071944~cell periphery	14	26.4151	0.746781	MAG, PHLDB1, TNFRSF12A, CSPG4, RABEPK, CNP, AFAP1L2, WTIP, ITPR2, MBP, PRKCQ, GSN, VWC2, TCHP	50	5885	19662	0.93549	1	0.98857	100
GOTERM_CC_ALL	GO:0005886~plasma membrane	13	24.5283	0.814435	MAG, TNFRSF12A, CSPG4, RABEPK, CNP, AFAP1L2, WTIP, ITPR2, MBP, PRKCQ, GSN, VWC2, TCHP	50	5762	19662	0.887213	1	0.994455	100
Annotation Cluster 31	Enrichment Score: 0.7220243210652733
Category	Term	Count	%	PValue	Genes	List Total	Pop Hits	Pop Total	Fold Enrichment	Bonferroni	Benjamini	FDR
GOTERM_BP_ALL	GO:0007006~mitochondrial membrane organization	3	5.66038	0.0189688	BAK1, NDUFA13, CNP	46	85	18082	13.8737	1	0.284765	27.7397
GOTERM_CC_ALL	GO:0005741~mitochondrial outer membrane	3	5.66038	0.0616806	SOX10, BAK1, CNP	50	162	19662	7.28222	1	0.45214	57.1598
GOTERM_CC_ALL	GO:0005739~mitochondrion	9	16.9811	0.0737452	SOX10, BAK1, AURKAIP1, NDUFA13, TCHP, ECHDC2, CNP, SARDH, PIN1	50	1792	19662	1.97498	1	0.493468	63.9405
GOTERM_CC_ALL	GO:0031968~organelle outer membrane	3	5.66038	0.0776833	SOX10, BAK1, CNP	50	185	19662	6.37686	1	0.482199	65.9292
GOTERM_CC_ALL	GO:0019867~outer membrane	3	5.66038	0.0805886	SOX10, BAK1, CNP	50	189	19662	6.2419	1	0.485912	67.3309
GOTERM_CC_ALL	GO:0044455~mitochondrial membrane part	3	5.66038	0.0879978	SOX10, BAK1, NDUFA13	50	199	19662	5.92824	1	0.49944	70.6675
GOTERM_CC_ALL	GO:0098805~whole membrane	7	13.2075	0.0984002	SOX10, BAK1, TMED3, TNR, RABEPK, CNP, ITPR2	50	1285	19662	2.14216	1	0.523006	74.8225
GOTERM_BP_ALL	GO:0006839~mitochondrial transport	3	5.66038	0.103867	BAK1, NDUFA13, CNP	46	220	18082	5.36028	1	0.568353	84.4401
GOTERM_BP_ALL	GO:0061024~membrane organization	5	9.43396	0.165174	BAK1, GSN, NDUFA13, CNP, MBP	46	861	18082	2.28273	1	0.683645	95.3239
GOTERM_CC_ALL	GO:0044429~mitochondrial part	5	9.43396	0.170469	SOX10, BAK1, NDUFA13, CNP, SARDH	50	870	19662	2.26	1	0.70385	91.6964
GOTERM_CC_ALL	GO:0031966~mitochondrial membrane	4	7.54717	0.192219	SOX10, BAK1, NDUFA13, CNP	50	607	19662	2.59137	1	0.735721	94.1706
GOTERM_CC_ALL	GO:0005740~mitochondrial envelope	4	7.54717	0.221263	SOX10, BAK1, NDUFA13, CNP	50	652	19662	2.41252	1	0.782714	96.42
GOTERM_CC_ALL	GO:0031967~organelle envelope	5	9.43396	0.275739	SOX10, BAK1, TRA2B, NDUFA13, CNP	50	1069	19662	1.83929	1	0.815094	98.6369
GOTERM_CC_ALL	GO:0031975~envelope	5	9.43396	0.278544	SOX10, BAK1, TRA2B, NDUFA13, CNP	50	1074	19662	1.83073	1	0.813298	98.7056
GOTERM_CC_ALL	GO:0098588~bounding membrane of organelle	6	11.3208	0.311417	SOX10, BAK1, TMED3, RABEPK, CNP, ITPR2	50	1487	19662	1.58671	1	0.848155	99.3043
GOTERM_CC_ALL	GO:0031090~organelle membrane	8	15.0943	0.358672	SOX10, BAK1, TMED3, TRA2B, RABEPK, NDUFA13, CNP, ITPR2	50	2326	19662	1.3525	1	0.869146	99.73
GOTERM_BP_ALL	GO:0007005~mitochondrion organization	3	5.66038	0.505572	BAK1, NDUFA13, CNP	46	676	18082	1.74447	1	0.956175	99.9994
GOTERM_BP_ALL	GO:0044802~single-organism membrane organization	3	5.66038	0.542857	BAK1, NDUFA13, CNP	46	724	18082	1.62881	1	0.96578	99.9998
GOTERM_CC_ALL	GO:0016023~cytoplasmic, membrane-bounded vesicle	3	5.66038	0.762047	TMED3, CNP, ITPR2	50	1087	19662	1.0853	1	0.989666	100
GOTERM_CC_ALL	GO:0031410~cytoplasmic vesicle	3	5.66038	0.811004	TMED3, CNP, ITPR2	50	1205	19662	0.979021	1	0.994747	100
GOTERM_CC_ALL	GO:0097708~intracellular vesicle	3	5.66038	0.812499	TMED3, CNP, ITPR2	50	1209	19662	0.975782	1	0.994581	100
Annotation Cluster 32	Enrichment Score: 0.7032950920084131
Category	Term	Count	%	PValue	Genes	List Total	Pop Hits	Pop Total	Fold Enrichment	Bonferroni	Benjamini	FDR
GOTERM_BP_ALL	GO:0009605~response to external stimulus	13	24.5283	0.00888851	CXCL1, MAG, COL3A1, CNP, JUNB, BAK1, PRKCQ, CCND1, EIF4EBP1, GSN, TNR, HIST1H3A, CCL27A	46	2301	18082	2.22083	1	0.201055	14.0553
GOTERM_BP_ALL	GO:0080134~regulation of response to stress	7	13.2075	0.0732206	CXCL1, PRKCQ, BAK1, TNFRSF12A, GSN, TNR, HIST1H3A	46	1191	18082	2.31033	1	0.492701	72.473
GOTERM_BP_ALL	GO:0002682~regulation of immune system process	6	11.3208	0.197322	CXCL1, PRKCQ, GSN, COL3A1, HIST1H3A, CCL27A	46	1249	18082	1.88833	1	0.734328	97.5981
GOTERM_BP_ALL	GO:0043903~regulation of symbiosis, encompassing mutualism through parasitism	3	5.66038	0.201799	CXCL1, GSN, HIST1H3A	46	334	18082	3.53072	1	0.741961	97.8155
GOTERM_BP_ALL	GO:0043900~regulation of multi-organism process	3	5.66038	0.30144	CXCL1, GSN, HIST1H3A	46	442	18082	2.66801	1	0.842032	99.7725
GOTERM_BP_ALL	GO:0002376~immune system process	8	15.0943	0.363861	CXCL1, PRKCQ, BAK1, GSN, COL3A1, HIST1H3A, CCL27A, JUNB	46	2342	18082	1.34274	1	0.890532	99.9535
GOTERM_BP_ALL	GO:0044403~symbiosis, encompassing mutualism through parasitism	3	5.66038	0.475585	CXCL1, GSN, HIST1H3A	46	639	18082	1.84548	1	0.945898	99.9982
GOTERM_BP_ALL	GO:0044419~interspecies interaction between organisms	3	5.66038	0.475585	CXCL1, GSN, HIST1H3A	46	639	18082	1.84548	1	0.945898	99.9982
GOTERM_BP_ALL	GO:0051704~multi-organism process	6	11.3208	0.728105	CXCL1, BAK1, GSN, HIST1H3A, CNP, JUNB	46	2393	18082	0.985592	1	0.993822	100
Annotation Cluster 33	Enrichment Score: 0.6367219038509934
Category	Term	Count	%	PValue	Genes	List Total	Pop Hits	Pop Total	Fold Enrichment	Bonferroni	Benjamini	FDR
GOTERM_BP_ALL	GO:0051726~regulation of cell cycle	7	13.2075	0.0166045	PRKCQ, BAK1, EIF4EBP1, CCND1, AFAP1L2, JUNB, PIN1	46	834	18082	3.29929	1	0.265175	24.7277
GOTERM_BP_ALL	GO:0010035~response to inorganic substance	5	9.43396	0.0494163	BAK1, CCND1, GSN, KRT10, JUNB	46	558	18082	3.52228	1	0.418236	57.6738
GOTERM_BP_ALL	GO:0009314~response to radiation	4	7.54717	0.0902217	BAK1, CCND1, COL3A1, JUNB	46	428	18082	3.67371	1	0.535679	79.8929
GOTERM_BP_ALL	GO:0042493~response to drug	4	7.54717	0.0995835	BAK1, CCND1, SST, JUNB	46	447	18082	3.51756	1	0.556961	83.129
GOTERM_BP_ALL	GO:0048608~reproductive structure development	3	5.66038	0.345551	BAK1, CCND1, JUNB	46	490	18082	2.40665	1	0.878519	99.9248
GOTERM_BP_ALL	GO:0061458~reproductive system development	3	5.66038	0.350104	BAK1, CCND1, JUNB	46	495	18082	2.38235	1	0.880562	99.9332
GOTERM_BP_ALL	GO:0003006~developmental process involved in reproduction	3	5.66038	0.617682	BAK1, CCND1, JUNB	46	829	18082	1.42251	1	0.980482	100
GOTERM_BP_ALL	GO:0044702~single organism reproductive process	3	5.66038	0.902683	BAK1, CCND1, JUNB	46	1525	18082	0.773286	1	0.99983	100
GOTERM_BP_ALL	GO:0022414~reproductive process	3	5.66038	0.928999	BAK1, CCND1, JUNB	46	1670	18082	0.706144	1	0.999945	100
GOTERM_BP_ALL	GO:0000003~reproduction	3	5.66038	0.929311	BAK1, CCND1, JUNB	46	1672	18082	0.7053	1	0.999945	100
Annotation Cluster 34	Enrichment Score: 0.5438899366996661
Category	Term	Count	%	PValue	Genes	List Total	Pop Hits	Pop Total	Fold Enrichment	Bonferroni	Benjamini	FDR
GOTERM_BP_ALL	GO:1902531~regulation of intracellular signal transduction	7	13.2075	0.18557	PRKCQ, S100B, COL3A1, CSPG4, NDUFA13, WTIP, PIN1	46	1552	18082	1.77294	1	0.716095	96.9264
GOTERM_BP_ALL	GO:0007517~muscle organ development	3	5.66038	0.25141	S100B, COL3A1, PIN1	46	388	18082	3.03933	1	0.797149	99.2645
GOTERM_BP_ALL	GO:0060537~muscle tissue development	3	5.66038	0.297741	S100B, COL3A1, PIN1	46	438	18082	2.69238	1	0.838532	99.7512
GOTERM_BP_ALL	GO:0061061~muscle structure development	3	5.66038	0.480519	S100B, COL3A1, PIN1	46	645	18082	1.82831	1	0.947771	99.9985
Annotation Cluster 35	Enrichment Score: 0.514969626793214
Category	Term	Count	%	PValue	Genes	List Total	Pop Hits	Pop Total	Fold Enrichment	Bonferroni	Benjamini	FDR
GOTERM_BP_ALL	GO:0043085~positive regulation of catalytic activity	8	15.0943	0.00927224	PRKCQ, BAK1, CCND1, GSN, WRAP53, CSPG4, NDUFA13, PIN1	46	965	18082	3.25875	1	0.203703	14.6181
GOTERM_BP_ALL	GO:0051347~positive regulation of transferase activity	5	9.43396	0.033963	PRKCQ, CCND1, WRAP53, CSPG4, PIN1	46	494	18082	3.97861	1	0.356319	44.3556
GOTERM_BP_ALL	GO:0044093~positive regulation of molecular function	8	15.0943	0.0361017	PRKCQ, BAK1, CCND1, GSN, WRAP53, CSPG4, NDUFA13, PIN1	46	1270	18082	2.47614	1	0.368069	46.409
GOTERM_BP_ALL	GO:0051247~positive regulation of protein metabolic process	8	15.0943	0.0612343	PRKCQ, BAK1, CCND1, AURKAIP1, GSN, CSPG4, NDUFA13, PIN1	46	1428	18082	2.20217	1	0.45828	65.7676
GOTERM_BP_ALL	GO:0051246~regulation of protein metabolic process	11	20.7547	0.0808718	PRKCQ, BAK1, EIF4EBP1, CCND1, S100B, AURKAIP1, GSN, CSPG4, NDUFA13, WTIP, PIN1	46	2483	18082	1.74142	1	0.511689	76.0844
GOTERM_BP_ALL	GO:0032270~positive regulation of cellular protein metabolic process	7	13.2075	0.111308	BAK1, CCND1, AURKAIP1, GSN, CSPG4, NDUFA13, PIN1	46	1334	18082	2.06268	1	0.587301	86.4926
GOTERM_BP_ALL	GO:0050790~regulation of catalytic activity	8	15.0943	0.114892	PRKCQ, BAK1, CCND1, GSN, WRAP53, CSPG4, NDUFA13, PIN1	46	1662	18082	1.89212	1	0.595034	87.3876
GOTERM_BP_ALL	GO:0051338~regulation of transferase activity	5	9.43396	0.124142	PRKCQ, CCND1, WRAP53, CSPG4, PIN1	46	771	18082	2.5492	1	0.614821	89.4465
GOTERM_BP_ALL	GO:0035556~intracellular signal transduction	10	18.8679	0.129496	PRKCQ, BAK1, EIF4EBP1, S100B, GSN, COL3A1, CSPG4, NDUFA13, WTIP, PIN1	46	2380	18082	1.65163	1	0.621212	90.4891
GOTERM_MF_ALL	GO:0019901~protein kinase binding	4	7.54717	0.183365	MAG, CCND1, CSPG4, PIN1	44	600	17446	2.64333	1	0.955595	92.7546
GOTERM_BP_ALL	GO:0032268~regulation of cellular protein metabolic process	9	16.9811	0.206182	BAK1, EIF4EBP1, CCND1, AURKAIP1, GSN, CSPG4, NDUFA13, WTIP, PIN1	46	2298	18082	1.53951	1	0.745714	98.0103
GOTERM_MF_ALL	GO:0019900~kinase binding	4	7.54717	0.224113	MAG, CCND1, CSPG4, PIN1	44	664	17446	2.38855	1	0.968817	96.2674
GOTERM_MF_ALL	GO:0016772~transferase activity, transferring phosphorus-containing groups	5	9.43396	0.233955	PRKCQ, POLE4, CCND1, AURKAIP1, PAK4	44	1005	17446	1.97264	1	0.962301	96.8365
GOTERM_BP_ALL	GO:0044267~cellular protein metabolic process	15	28.3019	0.238808	PRKCQ, BAK1, CCND1, EIF4EBP1, POLE4, RPS16, AURKAIP1, GSN, PAK4, COL3A1, CSPG4, NDUFA13, DPM3, WTIP, PIN1	46	4608	18082	1.27958	1	0.784869	99.0237
GOTERM_CC_ALL	GO:1990234~transferase complex	4	7.54717	0.269422	POLE4, CCND1, AURKAIP1, DPM3	50	724	19662	2.1726	1	0.817918	98.4698
GOTERM_CC_ALL	GO:1902494~catalytic complex	5	9.43396	0.274059	POLE4, CCND1, AURKAIP1, NDUFA13, DPM3	50	1066	19662	1.84447	1	0.818455	98.5942
GOTERM_BP_ALL	GO:0007049~cell cycle	6	11.3208	0.286832	PRKCQ, EIF4EBP1, CCND1, PAK4, AFAP1L2, PIN1	46	1440	18082	1.63786	1	0.831351	99.6768
GOTERM_BP_ALL	GO:0019538~protein metabolic process	16	30.1887	0.293801	AURKAIP1, COL3A1, CSPG4, NDUFA13, WTIP, PIN1, BAK1, PRKCQ, POLE4, EIF4EBP1, CCND1, S100B, RPS16, GSN, PAK4, DPM3	46	5186	18082	1.21276	1	0.835529	99.7264
GOTERM_BP_ALL	GO:0065009~regulation of molecular function	8	15.0943	0.304576	PRKCQ, BAK1, CCND1, GSN, WRAP53, CSPG4, NDUFA13, PIN1	46	2201	18082	1.42876	1	0.843984	99.7892
GOTERM_MF_ALL	GO:0016301~kinase activity	4	7.54717	0.351007	PRKCQ, CCND1, AURKAIP1, PAK4	44	852	17446	1.8615	1	0.971135	99.631
GOTERM_BP_ALL	GO:0010564~regulation of cell cycle process	3	5.66038	0.369119	PRKCQ, CCND1, PIN1	46	516	18082	2.28539	1	0.894237	99.9596
GOTERM_BP_ALL	GO:0006468~protein phosphorylation	6	11.3208	0.437095	PRKCQ, BAK1, CCND1, PAK4, CSPG4, PIN1	46	1737	18082	1.35781	1	0.930349	99.9942
GOTERM_BP_ALL	GO:0043412~macromolecule modification	11	20.7547	0.449727	PRKCQ, BAK1, POLE4, CCND1, AURKAIP1, PAK4, COL3A1, HIST1H3A, CSPG4, DPM3, PIN1	46	3719	18082	1.16267	1	0.935949	99.996
GOTERM_BP_ALL	GO:0018193~peptidyl-amino acid modification	4	7.54717	0.452346	PRKCQ, BAK1, POLE4, CSPG4	46	993	18082	1.58343	1	0.936892	99.9963
GOTERM_MF_ALL	GO:0004672~protein kinase activity	3	5.66038	0.469842	PRKCQ, CCND1, PAK4	44	638	17446	1.86442	1	0.986915	99.9732
GOTERM_BP_ALL	GO:0036211~protein modification process	10	18.8679	0.506293	PRKCQ, BAK1, POLE4, CCND1, AURKAIP1, PAK4, COL3A1, CSPG4, DPM3, PIN1	46	3474	18082	1.13151	1	0.956118	99.9994
GOTERM_BP_ALL	GO:0006464~cellular protein modification process	10	18.8679	0.506293	PRKCQ, BAK1, POLE4, CCND1, AURKAIP1, PAK4, COL3A1, CSPG4, DPM3, PIN1	46	3474	18082	1.13151	1	0.956118	99.9994
GOTERM_MF_ALL	GO:0019899~enzyme binding	6	11.3208	0.520825	MAG, EIF4EBP1, CCND1, CSPG4, MBP, PIN1	44	1923	17446	1.23713	1	0.991457	99.9928
GOTERM_MF_ALL	GO:0016773~phosphotransferase activity, alcohol group as acceptor	3	5.66038	0.551274	PRKCQ, CCND1, PAK4	44	742	17446	1.6031	1	0.99362	99.9969
GOTERM_BP_ALL	GO:0006796~phosphate-containing compound metabolic process	8	15.0943	0.585669	PRKCQ, BAK1, CCND1, PAK4, CSPG4, DPM3, CNP, PIN1	46	2869	18082	1.09609	1	0.975291	100
GOTERM_BP_ALL	GO:0006793~phosphorus metabolic process	8	15.0943	0.587249	PRKCQ, BAK1, CCND1, PAK4, CSPG4, DPM3, CNP, PIN1	46	2873	18082	1.09457	1	0.975471	100
GOTERM_BP_ALL	GO:0016310~phosphorylation	6	11.3208	0.594743	PRKCQ, BAK1, CCND1, PAK4, CSPG4, PIN1	46	2063	18082	1.14325	1	0.97647	100
GOTERM_BP_ALL	GO:0001932~regulation of protein phosphorylation	4	7.54717	0.64197	BAK1, CCND1, CSPG4, PIN1	46	1309	18082	1.20118	1	0.984353	100
GOTERM_BP_ALL	GO:0001934~positive regulation of protein phosphorylation	3	5.66038	0.658655	CCND1, CSPG4, PIN1	46	893	18082	1.32056	1	0.986587	100
GOTERM_BP_ALL	GO:0042327~positive regulation of phosphorylation	3	5.66038	0.683074	CCND1, CSPG4, PIN1	46	934	18082	1.26259	1	0.989623	100
GOTERM_BP_ALL	GO:0042325~regulation of phosphorylation	4	7.54717	0.691008	BAK1, CCND1, CSPG4, PIN1	46	1407	18082	1.11752	1	0.990422	100
GOTERM_MF_ALL	GO:0016740~transferase activity	6	11.3208	0.703954	PRKCQ, POLE4, CCND1, AURKAIP1, PAK4, DPM3	44	2347	17446	1.01363	1	0.997782	100
GOTERM_BP_ALL	GO:0045937~positive regulation of phosphate metabolic process	3	5.66038	0.746157	CCND1, CSPG4, PIN1	46	1053	18082	1.11991	1	0.995165	100
GOTERM_BP_ALL	GO:0010562~positive regulation of phosphorus metabolic process	3	5.66038	0.746157	CCND1, CSPG4, PIN1	46	1053	18082	1.11991	1	0.995165	100
GOTERM_BP_ALL	GO:0031401~positive regulation of protein modification process	3	5.66038	0.759852	CCND1, CSPG4, PIN1	46	1082	18082	1.08989	1	0.996008	100
GOTERM_BP_ALL	GO:0031399~regulation of protein modification process	4	7.54717	0.779748	BAK1, CCND1, CSPG4, PIN1	46	1618	18082	0.971785	1	0.997071	100
GOTERM_BP_ALL	GO:0019220~regulation of phosphate metabolic process	4	7.54717	0.784848	BAK1, CCND1, CSPG4, PIN1	46	1632	18082	0.963448	1	0.997289	100
GOTERM_BP_ALL	GO:0051174~regulation of phosphorus metabolic process	4	7.54717	0.785209	BAK1, CCND1, CSPG4, PIN1	46	1633	18082	0.962858	1	0.997272	100
GOTERM_MF_ALL	GO:0003824~catalytic activity	12	22.6415	0.908005	PRKCQ, POLE4, CCND1, AURKAIP1, PAK4, NDUFA13, ECHDC2, DPM3, OSGIN1, CNP, SARDH, PIN1	44	5911	17446	0.80494	1	0.99996	100
Annotation Cluster 36	Enrichment Score: 0.48370465068040996
Category	Term	Count	%	PValue	Genes	List Total	Pop Hits	Pop Total	Fold Enrichment	Bonferroni	Benjamini	FDR
GOTERM_MF_ALL	GO:0005509~calcium ion binding	5	9.43396	0.0923725	MATN4, S100B, GSN, RCN3, ITPR2	44	699	17446	2.83619	1	0.885538	71.5182
GOTERM_BP_ALL	GO:0035556~intracellular signal transduction	10	18.8679	0.129496	PRKCQ, BAK1, EIF4EBP1, S100B, GSN, COL3A1, CSPG4, NDUFA13, WTIP, PIN1	46	2380	18082	1.65163	1	0.621212	90.4891
GOTERM_MF_ALL	GO:0043167~ion binding	11	20.7547	0.637606	TRIM47, PRKCQ, BAK1, MATN4, S100B, GSN, COL3A1, WTIP, RCN3, PIN1, ITPR2	44	4288	17446	1.01714	1	0.996569	99.9998
GOTERM_MF_ALL	GO:0046872~metal ion binding	10	18.8679	0.70107	TRIM47, PRKCQ, BAK1, MATN4, S100B, GSN, COL3A1, WTIP, RCN3, ITPR2	44	4068	17446	0.97468	1	0.997947	100
GOTERM_MF_ALL	GO:0043169~cation binding	10	18.8679	0.713452	TRIM47, PRKCQ, BAK1, MATN4, S100B, GSN, COL3A1, WTIP, RCN3, ITPR2	44	4109	17446	0.964955	1	0.997865	100
Annotation Cluster 37	Enrichment Score: 0.44146569219348203
Category	Term	Count	%	PValue	Genes	List Total	Pop Hits	Pop Total	Fold Enrichment	Bonferroni	Benjamini	FDR
GOTERM_CC_ALL	GO:0005739~mitochondrion	9	16.9811	0.0737452	SOX10, BAK1, AURKAIP1, NDUFA13, TCHP, ECHDC2, CNP, SARDH, PIN1	50	1792	19662	1.97498	1	0.493468	63.9405
GOTERM_BP_ALL	GO:1901575~organic substance catabolic process	4	7.54717	0.787005	NDUFA13, ECHDC2, CNP, PIN1	46	1638	18082	0.959919	1	0.997325	100
GOTERM_BP_ALL	GO:0009056~catabolic process	4	7.54717	0.816379	NDUFA13, ECHDC2, CNP, PIN1	46	1725	18082	0.911506	1	0.998421	100
Annotation Cluster 38	Enrichment Score: 0.3869275938738026
Category	Term	Count	%	PValue	Genes	List Total	Pop Hits	Pop Total	Fold Enrichment	Bonferroni	Benjamini	FDR
GOTERM_BP_ALL	GO:0051707~response to other organism	5	9.43396	0.251372	CXCL1, BAK1, HIST1H3A, CNP, JUNB	46	1027	18082	1.91376	1	0.798092	99.2639
GOTERM_BP_ALL	GO:0043207~response to external biotic stimulus	5	9.43396	0.251922	CXCL1, BAK1, HIST1H3A, CNP, JUNB	46	1028	18082	1.9119	1	0.796915	99.273
GOTERM_BP_ALL	GO:0032496~response to lipopolysaccharide	3	5.66038	0.262526	CXCL1, CNP, JUNB	46	400	18082	2.94815	1	0.807412	99.4294
GOTERM_BP_ALL	GO:0002237~response to molecule of bacterial origin	3	5.66038	0.275506	CXCL1, CNP, JUNB	46	414	18082	2.84846	1	0.82228	99.5778
GOTERM_BP_ALL	GO:0009607~response to biotic stimulus	5	9.43396	0.283131	CXCL1, BAK1, HIST1H3A, CNP, JUNB	46	1084	18082	1.81313	1	0.828484	99.6472
GOTERM_BP_ALL	GO:0002376~immune system process	8	15.0943	0.363861	CXCL1, PRKCQ, BAK1, GSN, COL3A1, HIST1H3A, CCL27A, JUNB	46	2342	18082	1.34274	1	0.890532	99.9535
GOTERM_BP_ALL	GO:0009617~response to bacterium	3	5.66038	0.502382	CXCL1, CNP, JUNB	46	672	18082	1.75485	1	0.955252	99.9993
GOTERM_BP_ALL	GO:0030097~hemopoiesis	3	5.66038	0.658042	CXCL1, BAK1, JUNB	46	892	18082	1.32204	1	0.98662	100
GOTERM_BP_ALL	GO:0048534~hematopoietic or lymphoid organ development	3	5.66038	0.68653	CXCL1, BAK1, JUNB	46	940	18082	1.25453	1	0.989964	100
GOTERM_BP_ALL	GO:0002520~immune system development	3	5.66038	0.710964	CXCL1, BAK1, JUNB	46	984	18082	1.19844	1	0.992485	100
GOTERM_BP_ALL	GO:0051704~multi-organism process	6	11.3208	0.728105	CXCL1, BAK1, GSN, HIST1H3A, CNP, JUNB	46	2393	18082	0.985592	1	0.993822	100
Annotation Cluster 39	Enrichment Score: 0.3501154755707381
Category	Term	Count	%	PValue	Genes	List Total	Pop Hits	Pop Total	Fold Enrichment	Bonferroni	Benjamini	FDR
GOTERM_BP_ALL	GO:0006874~cellular calcium ion homeostasis	3	5.66038	0.275506	CXCL1, BAK1, S100B	46	414	18082	2.84846	1	0.82228	99.5778
GOTERM_BP_ALL	GO:0055074~calcium ion homeostasis	3	5.66038	0.288482	CXCL1, BAK1, S100B	46	428	18082	2.75528	1	0.832515	99.6893
GOTERM_BP_ALL	GO:0072503~cellular divalent inorganic cation homeostasis	3	5.66038	0.294039	CXCL1, BAK1, S100B	46	434	18082	2.71719	1	0.834954	99.728
GOTERM_BP_ALL	GO:0072507~divalent inorganic cation homeostasis	3	5.66038	0.31621	CXCL1, BAK1, S100B	46	458	18082	2.57481	1	0.855288	99.8417
GOTERM_BP_ALL	GO:0006875~cellular metal ion homeostasis	3	5.66038	0.37092	CXCL1, BAK1, S100B	46	518	18082	2.27657	1	0.895057	99.9615
GOTERM_BP_ALL	GO:0030003~cellular cation homeostasis	3	5.66038	0.431742	CXCL1, BAK1, S100B	46	587	18082	2.00896	1	0.928707	99.9931
GOTERM_BP_ALL	GO:0055065~metal ion homeostasis	3	5.66038	0.435181	CXCL1, BAK1, S100B	46	591	18082	1.99537	1	0.930216	99.9938
GOTERM_BP_ALL	GO:0006873~cellular ion homeostasis	3	5.66038	0.444582	CXCL1, BAK1, S100B	46	602	18082	1.95891	1	0.933613	99.9953
GOTERM_BP_ALL	GO:0055080~cation homeostasis	3	5.66038	0.49998	CXCL1, BAK1, S100B	46	669	18082	1.76272	1	0.954634	99.9992
GOTERM_BP_ALL	GO:0098771~inorganic ion homeostasis	3	5.66038	0.512705	CXCL1, BAK1, S100B	46	685	18082	1.72155	1	0.957601	99.9995
GOTERM_BP_ALL	GO:0050801~ion homeostasis	3	5.66038	0.542099	CXCL1, BAK1, S100B	46	723	18082	1.63107	1	0.965814	99.9998
GOTERM_BP_ALL	GO:0055082~cellular chemical homeostasis	3	5.66038	0.571021	CXCL1, BAK1, S100B	46	762	18082	1.54759	1	0.972122	99.9999
GOTERM_BP_ALL	GO:0042592~homeostatic process	5	9.43396	0.62507	CXCL1, PRKCQ, BAK1, S100B, WRAP53	46	1707	18082	1.1514	1	0.981647	100
GOTERM_BP_ALL	GO:0019725~cellular homeostasis	3	5.66038	0.641797	CXCL1, BAK1, S100B	46	866	18082	1.36173	1	0.98447	100
GOTERM_BP_ALL	GO:0048878~chemical homeostasis	3	5.66038	0.768485	CXCL1, BAK1, S100B	46	1101	18082	1.07108	1	0.996493	100
Annotation Cluster 40	Enrichment Score: 0.29487684167609596
Category	Term	Count	%	PValue	Genes	List Total	Pop Hits	Pop Total	Fold Enrichment	Bonferroni	Benjamini	FDR
GOTERM_CC_ALL	GO:0097458~neuron part	6	11.3208	0.378625	MAG, S100B, SST, MBP, PIN1, ITPR2	50	1620	19662	1.45644	1	0.875173	99.8228
GOTERM_CC_ALL	GO:0043025~neuronal cell body	3	5.66038	0.476031	S100B, SST, MBP	50	639	19662	1.8462	1	0.911774	99.9817
GOTERM_CC_ALL	GO:0044297~cell body	3	5.66038	0.543211	S100B, SST, MBP	50	724	19662	1.62945	1	0.943284	99.9971
GOTERM_CC_ALL	GO:0036477~somatodendritic compartment	3	5.66038	0.675585	S100B, SST, MBP	50	921	19662	1.28091	1	0.976439	100
Annotation Cluster 41	Enrichment Score: 0.2916148672205745
Category	Term	Count	%	PValue	Genes	List Total	Pop Hits	Pop Total	Fold Enrichment	Bonferroni	Benjamini	FDR
GOTERM_MF_ALL	GO:0046983~protein dimerization activity	5	9.43396	0.357717	BAK1, POLE4, S100B, H2AFZ, OLIG2	44	1226	17446	1.61705	1	0.9702	99.6775
GOTERM_MF_ALL	GO:0042803~protein homodimerization activity	3	5.66038	0.591501	BAK1, S100B, OLIG2	44	798	17446	1.4906	1	0.995353	99.9991
GOTERM_MF_ALL	GO:0042802~identical protein binding	4	7.54717	0.630464	SOX10, BAK1, S100B, OLIG2	44	1299	17446	1.22094	1	0.996638	99.9998
Annotation Cluster 42	Enrichment Score: 0.2907814988856914
Category	Term	Count	%	PValue	Genes	List Total	Pop Hits	Pop Total	Fold Enrichment	Bonferroni	Benjamini	FDR
GOTERM_BP_ALL	GO:0080134~regulation of response to stress	7	13.2075	0.0732206	CXCL1, PRKCQ, BAK1, TNFRSF12A, GSN, TNR, HIST1H3A	46	1191	18082	2.31033	1	0.492701	72.473
GOTERM_BP_ALL	GO:0051050~positive regulation of transport	3	5.66038	0.722072	CXCL1, PRKCQ, BAK1	46	1005	18082	1.17339	1	0.993343	100
GOTERM_BP_ALL	GO:0044765~single-organism transport	7	13.2075	0.814381	CXCL1, PRKCQ, BAK1, CCND1, GSN, NDUFA13, ITPR2	46	3128	18082	0.87967	1	0.998399	100
GOTERM_BP_ALL	GO:1902578~single-organism localization	7	13.2075	0.859556	CXCL1, PRKCQ, BAK1, CCND1, GSN, NDUFA13, ITPR2	46	3325	18082	0.827551	1	0.999384	100
GOTERM_BP_ALL	GO:0051049~regulation of transport	3	5.66038	0.950116	CXCL1, PRKCQ, BAK1	46	1828	18082	0.64511	1	0.999983	100
Annotation Cluster 43	Enrichment Score: 0.21237211493208047
Category	Term	Count	%	PValue	Genes	List Total	Pop Hits	Pop Total	Fold Enrichment	Bonferroni	Benjamini	FDR
GOTERM_MF_ALL	GO:0008092~cytoskeletal protein binding	4	7.54717	0.343482	ARPC1B, S100B, GSN, KRT10	44	841	17446	1.88585	1	0.971833	99.5716
GOTERM_CC_ALL	GO:0044430~cytoskeletal part	4	7.54717	0.750967	ARPC1B, GSN, TCHP, KRT10	50	1544	19662	1.01876	1	0.988622	100
GOTERM_CC_ALL	GO:0005856~cytoskeleton	4	7.54717	0.894044	ARPC1B, GSN, TCHP, KRT10	50	2032	19662	0.774094	1	0.998942	100
Annotation Cluster 44	Enrichment Score: 0.20021653146505683
Category	Term	Count	%	PValue	Genes	List Total	Pop Hits	Pop Total	Fold Enrichment	Bonferroni	Benjamini	FDR
GOTERM_CC_ALL	GO:0005829~cytosol	7	13.2075	0.386005	BAK1, EIF4EBP1, CCND1, RPS16, GSN, WTIP, PIN1	50	2011	19662	1.36881	1	0.873972	99.8488
GOTERM_BP_ALL	GO:0006412~translation	3	5.66038	0.535244	EIF4EBP1, RPS16, WTIP	46	714	18082	1.65163	1	0.963839	99.9998
GOTERM_BP_ALL	GO:0043043~peptide biosynthetic process	3	5.66038	0.551134	EIF4EBP1, RPS16, WTIP	46	735	18082	1.60444	1	0.967843	99.9999
GOTERM_BP_ALL	GO:0043604~amide biosynthetic process	3	5.66038	0.602098	EIF4EBP1, RPS16, WTIP	46	806	18082	1.4631	1	0.97741	100
GOTERM_BP_ALL	GO:0006518~peptide metabolic process	3	5.66038	0.645597	EIF4EBP1, RPS16, WTIP	46	872	18082	1.35236	1	0.984841	100
GOTERM_BP_ALL	GO:0043603~cellular amide metabolic process	3	5.66038	0.736837	EIF4EBP1, RPS16, WTIP	46	1034	18082	1.14048	1	0.9945	100
GOTERM_BP_ALL	GO:1901566~organonitrogen compound biosynthetic process	3	5.66038	0.856106	EIF4EBP1, RPS16, WTIP	46	1339	18082	0.880703	1	0.999335	100
GOTERM_BP_ALL	GO:1901564~organonitrogen compound metabolic process	4	7.54717	0.89606	EIF4EBP1, RPS16, WTIP, SARDH	46	2039	18082	0.771137	1	0.999787	100
Annotation Cluster 45	Enrichment Score: 0.19636391730821026
Category	Term	Count	%	PValue	Genes	List Total	Pop Hits	Pop Total	Fold Enrichment	Bonferroni	Benjamini	FDR
GOTERM_CC_ALL	GO:0044432~endoplasmic reticulum part	4	7.54717	0.464179	TMED3, DPM3, RCN3, ITPR2	50	1010	19662	1.55739	1	0.909781	99.9753
GOTERM_CC_ALL	GO:0005783~endoplasmic reticulum	5	9.43396	0.558132	BAK1, TMED3, DPM3, RCN3, ITPR2	50	1572	19662	1.25076	1	0.945978	99.9981
GOTERM_CC_ALL	GO:0005789~endoplasmic reticulum membrane	3	5.66038	0.657567	TMED3, DPM3, ITPR2	50	891	19662	1.32404	1	0.97404	99.9999
GOTERM_CC_ALL	GO:0042175~nuclear outer membrane-endoplasmic reticulum membrane network	3	5.66038	0.669067	TMED3, DPM3, ITPR2	50	910	19662	1.2964	1	0.975869	100
GOTERM_CC_ALL	GO:0012505~endomembrane system	7	13.2075	0.914847	BAK1, TMED3, TRA2B, RABEPK, DPM3, RCN3, ITPR2	50	3661	19662	0.751893	1	0.999413	100
Annotation Cluster 46	Enrichment Score: 0.12504967492262123
Category	Term	Count	%	PValue	Genes	List Total	Pop Hits	Pop Total	Fold Enrichment	Bonferroni	Benjamini	FDR
GOTERM_BP_ALL	GO:0030001~metal ion transport	3	5.66038	0.588178	CXCL1, BAK1, ITPR2	46	786	18082	1.50033	1	0.975489	100
GOTERM_BP_ALL	GO:0006812~cation transport	3	5.66038	0.668952	CXCL1, BAK1, ITPR2	46	910	18082	1.29589	1	0.988019	100
GOTERM_BP_ALL	GO:0044765~single-organism transport	7	13.2075	0.814381	CXCL1, PRKCQ, BAK1, CCND1, GSN, NDUFA13, ITPR2	46	3128	18082	0.87967	1	0.998399	100
GOTERM_BP_ALL	GO:1902578~single-organism localization	7	13.2075	0.859556	CXCL1, PRKCQ, BAK1, CCND1, GSN, NDUFA13, ITPR2	46	3325	18082	0.827551	1	0.999384	100
GOTERM_BP_ALL	GO:0006811~ion transport	3	5.66038	0.860491	CXCL1, BAK1, ITPR2	46	1354	18082	0.870946	1	0.99939	100
Annotation Cluster 47	Enrichment Score: 0.050095678023999085
Category	Term	Count	%	PValue	Genes	List Total	Pop Hits	Pop Total	Fold Enrichment	Bonferroni	Benjamini	FDR
GOTERM_MF_ALL	GO:0036094~small molecule binding	7	13.2075	0.653794	PRKCQ, TRA2B, PAK4, NDUFA13, CNP, SARDH, ITPR2	44	2649	17446	1.04775	1	0.996968	99.9999
GOTERM_MF_ALL	GO:1901265~nucleoside phosphate binding	6	11.3208	0.736639	PRKCQ, TRA2B, PAK4, NDUFA13, CNP, SARDH	44	2438	17446	0.9758	1	0.998397	100
GOTERM_MF_ALL	GO:0000166~nucleotide binding	6	11.3208	0.736639	PRKCQ, TRA2B, PAK4, NDUFA13, CNP, SARDH	44	2438	17446	0.9758	1	0.998397	100
GOTERM_MF_ALL	GO:0005524~ATP binding	3	5.66038	0.89617	PRKCQ, PAK4, NDUFA13	44	1507	17446	0.789317	1	0.99996	100
GOTERM_MF_ALL	GO:0032559~adenyl ribonucleotide binding	3	5.66038	0.904841	PRKCQ, PAK4, NDUFA13	44	1548	17446	0.768411	1	0.999967	100
GOTERM_MF_ALL	GO:0030554~adenyl nucleotide binding	3	5.66038	0.906454	PRKCQ, PAK4, NDUFA13	44	1556	17446	0.76446	1	0.999964	100
GOTERM_MF_ALL	GO:0035639~purine ribonucleoside triphosphate binding	3	5.66038	0.951862	PRKCQ, PAK4, NDUFA13	44	1858	17446	0.640205	1	0.999997	100
GOTERM_MF_ALL	GO:0032550~purine ribonucleoside binding	3	5.66038	0.953361	PRKCQ, PAK4, NDUFA13	44	1872	17446	0.635417	1	0.999997	100
GOTERM_MF_ALL	GO:0032549~ribonucleoside binding	3	5.66038	0.953677	PRKCQ, PAK4, NDUFA13	44	1875	17446	0.6344	1	0.999996	100
GOTERM_MF_ALL	GO:0001883~purine nucleoside binding	3	5.66038	0.953677	PRKCQ, PAK4, NDUFA13	44	1875	17446	0.6344	1	0.999996	100
GOTERM_MF_ALL	GO:0001882~nucleoside binding	3	5.66038	0.954509	PRKCQ, PAK4, NDUFA13	44	1883	17446	0.631705	1	0.999995	100
GOTERM_MF_ALL	GO:0032555~purine ribonucleotide binding	3	5.66038	0.95702	PRKCQ, PAK4, NDUFA13	44	1908	17446	0.623428	1	0.999995	100
GOTERM_MF_ALL	GO:0017076~purine nucleotide binding	3	5.66038	0.957988	PRKCQ, PAK4, NDUFA13	44	1918	17446	0.620177	1	0.999995	100
GOTERM_MF_ALL	GO:0032553~ribonucleotide binding	3	5.66038	0.958464	PRKCQ, PAK4, NDUFA13	44	1923	17446	0.618565	1	0.999994	100
GOTERM_MF_ALL	GO:0097367~carbohydrate derivative binding	3	5.66038	0.98183	PRKCQ, PAK4, NDUFA13	44	2276	17446	0.522627	1	1	100
Annotation Cluster 48	Enrichment Score: 0.002269642805214228
Category	Term	Count	%	PValue	Genes	List Total	Pop Hits	Pop Total	Fold Enrichment	Bonferroni	Benjamini	FDR
GOTERM_CC_ALL	GO:0044425~membrane part	14	26.4151	0.993521	MAG, SOX10, FAM173A, TNFRSF12A, CSPG4, NDUFA13, ITPR2, LHFPL3, BAK1, PRKCQ, TMED3, TNR, VWC2, DPM3	50	8380	19662	0.656964	1	1	100
GOTERM_CC_ALL	GO:0016021~integral component of membrane	11	20.7547	0.994795	LHFPL3, MAG, BAK1, FAM173A, TMED3, TNFRSF12A, CSPG4, NDUFA13, VWC2, DPM3, ITPR2	50	7127	19662	0.606937	1	1	100
GOTERM_CC_ALL	GO:0031224~intrinsic component of membrane	11	20.7547	0.996049	LHFPL3, MAG, BAK1, FAM173A, TMED3, TNFRSF12A, CSPG4, NDUFA13, VWC2, DPM3, ITPR2	50	7260	19662	0.595818	1	1	100
